# Supplementary material for: Shared activity patterns arising at genetic susceptibility loci reveal underlying genomic and cellular architecture of human disease
Source: PLoS Comput Biol. 2018 Mar 1;14(3):e1005934. doi: 10.1371/journal.pcbi.1005934 (PMC5849332; doi:10.1371/journal.pcbi.1005934)
Supplement: S1 Table — (XLSX) [file pcbi.1005934.s001.xlsx]

## Sheet: all_results
Height
Top promoter[SNPs in top promoter]		Linkage	Top promoter[SNPs in top promoter]	promoter snps in region	chosen promoter id	promoters	original p	Corrected coexpression score	raw p(perm)	FDR
p3@RPL17 [rs3814888]			p3@RPL17 [rs3814888]	rs3814888	chr18:47018897..47018922,-	p3@RPL17	0	0.68	0	0
		rs3814888:rs7506517 D'=1.0; rsquared=0.57. enhancer@chr18:46946352-46946456 [rs7506517]	enhancer@chr18:46946352-46946456 [rs7506517]	rs7506517	chr18:46946352-46946456	enhancer@chr18:46946352-46946456	0	0.05	0.843005	0.91
p1@CENPW [rs9388486]			p1@CENPW [rs9388486]	rs9388486	chr6:126661253..126661356,+	p2@CENPW, p1@CENPW, p3@CENPW, p4@CENPW	0	0.67	0	0
p1@TCF19 [rs720468, rs3130456]			p1@TCF19 [rs720468, rs3130456]	rs720468, rs3130456, rs2596429, rs6457401, rs6457402, rs7767216, rs2844519, rs6906175, rs2394994	chr6:31126291..31126399,+	p1@CCHCR1, p1@TCF19, enhancer@chr6:31334700-31334921, p1@DHFRP2, chr6:31371127..31371162,-, p1@MICA, p@chr6:31391394..31391405,-	0	0.65	0	0
p1@RPL35P2 [rs6457769]			p1@RPL35P2 [rs6457769]	rs6457769	chr6:34231454..34231483,-	p1@RPL35P2, p2@RPL35P2	0	0.62	0	0
p1@PSMC3 [rs7948705]			p1@PSMC3 [rs7948705]	rs7948705	chr11:47447784..47447817,-	p1@PSMC3, p2@PSMC3	0	0.6	0	0
		rs7948705:rs3740689 D'=1.0; rsquared=0.58. p@chr11:47380465..47380487,- [rs3740689]	p@chr11:47380465..47380487,- [rs3740689]	rs3740689	chr11:47380465..47380487,-	p@chr11:47380465..47380487,-	0	0.02	0.953593	0.98
p@chr1:184021069..184021077,+ [rs2274432]			p@chr1:184021069..184021077,+ [rs2274432]	rs3814333, rs2274432	chr1:184021069..184021077,+	p1@GLT25D2, p1@TSEN15, p4@TSEN15, p@chr1:184021069..184021077,+	0	0.58	0	0
p2@CPNE1, p2@RBM12 [rs6119636]			p2@CPNE1, p2@RBM12 [rs6119636]	rs3795159, rs6060369, rs6088791, rs941665, rs6087704, rs224328, rs143383, rs6060442, rs2104417, rs8825, rs11698601, rs6060516, rs6060518, rs6121015, rs6119636, rs2425083, rs2425090, rs2425112, rs6121037, rs1890470	chr20:34252847..34252864,-	enhancer@chr20:33896147-33896435, enhancer@chr20:33907005-33907177, enhancer@chr20:33907745-33907913, enhancer@chr20:33943108-33943431, p@chr20:34001017..34001019,-, enhancer@chr20:34018897-34019177, p3@GDF5, p2@GDF5, p1@GDF5, p4@GDF5, enhancer@chr20:34093619-34093844, enhancer@chr20:34127589-34128004, p2@ERGIC3, p1@SPAG4, p@chr20:34214061..34214118,-, enhancer@chr20:34217204-34217560, chr20:3424…	0	0.56	0	0
p@chr17:47039347..47039351,+ [rs2291725, rs2291726]			p@chr17:47039347..47039351,+ [rs2291725, rs2291726]	rs15563, rs2291725, rs2291726	chr17:47039347..47039351,+	p@chr17:47005250..47005261,+, p@chr17:47039007..47039034,-, p@chr17:47039342..47039353,-, p@chr17:47039347..47039351,+	0	0.54	0	0
p1@NCAPG [rs11941723, rs2074974]			p1@NCAPG [rs11941723, rs2074974]	rs11941723, rs2074974, rs16895884	chr4:17812568..17812648,+	p1@DCAF16, chr4:17812548..17812555,+, p1@NCAPG, enhancer@chr4:17853657-17853735	0	0.54	0	0
		rs2074974:rs4698210 D'=1.0; rsquared=0.62. enhancer@chr4:17827662-17827866 [rs4698210]	enhancer@chr4:17827662-17827866 [rs4698210]	rs4698210	chr4:17827662-17827866	enhancer@chr4:17827662-17827866	0	0.31	0.0591852	0.21
p2@RQCD1 [rs500422]			p2@RQCD1 [rs500422]	rs921968, rs833083, rs500422	chr2:219433281..219433406,+	enhancer@chr2:219271996-219272374, enhancer@chr2:219336861-219337006, p3@USP37, p1@USP37, p2@RQCD1	0	0.52	0	0
		rs500422:rs611203 D'=1.0; rsquared=0.98. p2@PLCD4 [rs611203]	p2@PLCD4 [rs611203]	rs611203	chr2:219472585..219472600,+	p3@PLCD4, p5@PLCD4, p2@PLCD4, p1@PLCD4	0	0.12	0.562836	0.76
p@chr6:31595842..31595910,- [rs1046080]			p@chr6:31595842..31595910,- [rs1046080]	rs3093948, rs1129640, rs2516393, rs2523512, rs2523511, rs2523502, rs2259571, rs2857694, rs2857693, rs2260000, rs2736171, rs1046080, rs805299, rs3117578, rs9267551, rs2272592	chr6:31595842..31595910,-	chr6:31501129..31501151,-, p@chr6:31506594..31506607,-, p@chr6:31513929..31513944,-, p3@AIF1, p2@AIF1, p7@AIF1, p@chr6:31587891..31587942,+, p@chr6:31588078..31588091,-, p@chr6:31588110..31588141,-, p3@PRRC2A, p1@PRRC2A, p2@PRRC2A, p8@PRRC2A, p@chr6:31595532..31595564,+, p@chr6:31595842..31595910,-, p8@BAG6, p4@BAG6, p2@APOM, chr6:31636321..31636337,+, p5@DDAH2, p1@DDAH2, chr6:31698189..31698213,…	0	0.51	0	0
		rs1046080:rs3130054 D'=0.56; rsquared=0.19. p1@MCCD1 [rs3130054]	p1@MCCD1 [rs3130054]	rs3130054	chr6:31496733..31496745,+	p1@MCCD1, p2@MCCD1, p3@MCCD1	0	0.28	0.109627	0.3
p4@HIST1H4A, p4@HIST1H4B, p4@HIST1H4D, p4@HIST1H4E, p4@HIST1H4F, p4@HIST1H4H, p4@HIST1H4I, p4@HIST1H4J, p4@HIST1H4K, p4@HIST1H4L, p4@HIST2H4A, p4@HIST2H4B, p4@HIST4H4, p5@HIST1H4C [rs2393593, rs3999544]			p4@HIST1H4A, p4@HIST1H4B, p4@HIST1H4D, p4@HIST1H4E, p4@HIST1H4F, p4@HIST1H4H, p4@HIST1H4I, p4@HIST1H4J, p4@HIST1H4K, p4@HIST1H4L, p4@HIST2H4A, p4@HIST2H4B, p4@HIST4H4, p5@HIST1H4C [rs2393593, rs3999544]	rs198853, rs198852, rs2183947, rs9379829, rs806977, rs4145878, rs806795, rs10946808, rs9393690, rs9393691, rs2393592, rs2393593, rs3999544, rs9358925	chr6:26285754..26285769,-	p1@HIST1H4C, p@chr6:26104437..26104461,-, p@chr6:26159499..26159503,+, p1@BC042589, p2@BC042589, p3@HIST1H4A,p3@HIST1H4B,p3@HIST1H4D,p3@HIST1H4E,p3@HIST1H4F,p3@HIST1H4H,p3@HIST1H4I,p3@HIST1H4J,p3@HIST1H4K,p3@HIST1H4L,p3@HIST2H4A,p3@HIST2H4B,p3@HIST4H4,p4@HIST1H4C, p@chr6:26198106..26198110,-, p@chr6:26205042..26205052,-, enhancer@chr6:26232920-26233434, p8@HIST1H3A,p8@HIST1H3B,p8@HIST1H3C,p8@HIST…	0	0.51	0	0
p@chr20:47679880..47679883,+ [rs6019621]			p@chr20:47679880..47679883,+ [rs6019621]	rs6019621	chr20:47679880..47679883,+	p@chr20:47679880..47679883,+	0	0.49	0	0
p1@JMJD4 [rs2295994]			p1@JMJD4 [rs2295994]	rs2295994	chr1:227922934..227923013,-	p1@JMJD4, p1@SNAP47	0	0.49	0	0
p1@ZNFX1-AS1 [rs6648]			p1@ZNFX1-AS1 [rs6648]	rs13038202, rs6648	chr20:47895175..47895182,+	p2@DDX27, p2@ZNFX1, p1@ZNFX1-AS1	0	0.48	0	0
p1@EXOSC5 [rs10853751]			p1@EXOSC5 [rs10853751]	rs10853751, rs892044, rs1043413, rs13344547, rs13346603	chr19:41903234..41903303,-	p1@EXOSC5, p1@BCKDHA, p@chr19:41939081..41939097,-, p1@ATP5SL	0	0.48	0	0
		same SNP, different promoter: chr19:41903221..41903222,+ [rs10853751]	chr19:41903221..41903222,+ [rs10853751]	rs10853751	chr19:41903221..41903222,+	chr19:41903221..41903222,+	0	0.07	0.737221	0.85
p@chr2:242192880..242192896,- [rs7578199]			p@chr2:242192880..242192896,- [rs7578199]	rs7578199	chr2:242192880..242192896,-	p@chr2:242192880..242192896,-	0	0.47	0	0
p12@ZBTB38 [rs1863868]			p12@ZBTB38 [rs1863868]	rs6795197, rs6795377, rs6765857, rs9823774, rs9823785, rs1863868, rs6763931, rs724016, rs2871960, rs13091182, rs6789653, rs1077181, rs3821712, rs6808837, rs10513140	chr3:141087562..141087594,+	enhancer@chr3:141047061-141047339, enhancer@chr3:141050524-141051086, chr3:141051082..141051091,+, p@chr3:141061589..141061593,+, p12@ZBTB38, enhancer@chr3:141102647-141102881, chr3:141105460..141105505,+, p@chr3:141105560..141105572,-, p@chr3:141105574..141105581,-, p@chr3:141105589..141105621,-, p4@ZBTB38, p@chr3:141105795..141105814,+, p@chr3:141105820..141105861,+, p9@ZBTB38, p5@ZBTB38, p13@Z…	0	0.47	0	0
p@chr7:23507613..23507647,+ [rs4496867]			p@chr7:23507613..23507647,+ [rs4496867]	rs4496867	chr7:23507613..23507647,+	p10@IGF2BP3, p@chr7:23507613..23507647,+	0	0.46	0	0
chr16:2257216..2257230,+ [rs26862]			chr16:2257216..2257230,+ [rs26862]	rs26862	chr16:2257216..2257230,+	chr16:2257216..2257230,+	0	0.45	0.0004804	0
p@chr9:95691523..95691530,- [rs13296126]			p@chr9:95691523..95691530,- [rs13296126]	rs13296126	chr9:95691523..95691530,-	p@chr9:95691523..95691530,-	0	0.43	0.00105688	0.01
		rs13296126:rs13293147 D'=0.97; rsquared=0.6. enhancer@chr9:95727493-95728071 [rs13293147]	enhancer@chr9:95727493-95728071 [rs13293147]	rs13293147	chr9:95727493-95728071	enhancer@chr9:95727493-95728071	0	0.04	0.889316	0.93
chr9:86593333..86593367,- [rs167203]			chr9:86593333..86593367,- [rs167203]	rs167203	chr9:86593333..86593367,-	p3@HNRNPK, chr9:86593333..86593367,-	0	0.43	0.00134512	0.01
p@chr7:92244110..92244132,- [rs42039]			p@chr7:92244110..92244132,- [rs42039]	rs12386703, rs10261596, rs10276838, rs6955925, rs17687886, rs6956251, rs42039, rs2282978	chr7:92244110..92244132,-	p2@PEX1, p3@PEX1, p1@PEX1, p1@RBM48, p@chr7:92164834..92164839,+, p@chr7:92200840..92200846,-, p@chr7:92213359..92213360,-, p@chr7:92244110..92244132,-, enhancer@chr7:92264263-92264527	0	0.43	0.00182552	0.01
p@chr6:28926723..28926729,+ [rs6901599]			p@chr6:28926723..28926729,+ [rs6901599]	rs6901599, rs6916161	chr6:28926723..28926729,+	p@chr6:28926723..28926729,+, p@chr6:28983846..28983850,+	0	0.41	0.00374712	0.03
p@chr4:145568170..145568180,- [rs7689420]			p@chr4:145568170..145568180,- [rs7689420]	rs7689420, rs6537301	chr4:145568170..145568180,-	p@chr4:145568170..145568180,-, p@chr4:145568348..145568363,-, p@chr4:145568421..145568432,-, p@chr4:145580204..145580215,+	0	0.41	0.00441968	0.03
enhancer@chr7:46431809-46432084 [rs12534091]			enhancer@chr7:46431809-46432084 [rs12534091]	rs12534091	chr7:46431809-46432084	enhancer@chr7:46431809-46432084	0	0.39	0.00634128	0.04
		rs12534091:rs13231201 D'=1.0; rsquared=0.85. p@chr7:46385081..46385087,+ [rs13231201, rs13233996]; rs12534091:rs13233996 D'=1.0; rsquared=0.85. p@chr7:46385081..46385087,+ [rs13231201, rs13233996]	p@chr7:46385081..46385087,+ [rs13231201, rs13233996]	rs13231201, rs13233996	chr7:46385081..46385087,+	p@chr7:46385081..46385087,+	0	0.24	0.194562	0.41
p1@ENST00000408001 [rs2764205]			p1@ENST00000408001 [rs2764205]	rs2764205	chr6:34711914..34711921,+	p1@ENST00000408001	0	0.39	0.00643736	0.04
		rs2764205:rs3800457 D'=1.0; rsquared=0.96. enhancer@chr6:34663389-34663600 [rs3800457]	enhancer@chr6:34663389-34663600 [rs3800457]	rs3800457	chr6:34663389-34663600	enhancer@chr6:34663389-34663600	0	0.16	0.41372	0.62
p@chr17:59485435..59485452,+ [rs2240736]			p@chr17:59485435..59485452,+ [rs2240736]	rs887258, rs2240736	chr17:59485435..59485452,+	p@chr17:59479775..59479790,+, p@chr17:59485435..59485452,+	0	0.39	0.00816679	0.05
chr11:75277935..75277984,+ [rs651581]			chr11:75277935..75277984,+ [rs651581]	rs584961, rs651581	chr11:75277935..75277984,+	chr11:75277700..75277754,+, chr11:75277865..75277893,+, chr11:75277935..75277984,+	0	0.39	0.00816679	0.05
enhancer@chr2:241860652-241861096 [rs10207380]			enhancer@chr2:241860652-241861096 [rs10207380]	rs10207380	chr2:241860652-241861096	enhancer@chr2:241860652-241861096	0	0.37	0.010857	0.06
		rs10207380:rs7591322 D'=1.0; rsquared=0.9. enhancer@chr2:241899989-241900661 [rs7591322]	enhancer@chr2:241899989-241900661 [rs7591322]	rs7591322	chr2:241899989-241900661	enhancer@chr2:241899989-241900661	0	0.06	0.782571	0.88
enhancer@chr15:74226590-74227025 [rs2028386, rs4337252]			enhancer@chr15:74226590-74227025 [rs2028386, rs4337252]	rs1992314, rs2028386, rs4337252, rs5742914	chr15:74226590-74227025	enhancer@chr15:74223574-74223817, enhancer@chr15:74226590-74227025, p3@PML, p1@PML, p2@PML	0	0.37	0.0136434	0.07
p1@ENST00000438379 [rs1182175]			p1@ENST00000438379 [rs1182175]	rs4719641, rs6461534, rs1182175	chr7:2875244..2875267,+	enhancer@chr7:2744937-2745164, p1@ENST00000438379	0	0.37	0.0137394	0.07
p3@SLC38A9 [rs6450345]			p3@SLC38A9 [rs6450345]	rs6450345	chr5:55008072..55008098,-	p3@SLC38A9, p2@SLC38A9, p1@SLC38A9	0	0.36	0.0153728	0.08
		rs6450345:rs2408204 D'=1.0; rsquared=0.91. p4@SLC38A9 [rs2408204]	p4@SLC38A9 [rs2408204]	rs2408204	chr5:54988526..54988545,-	p4@SLC38A9, p7@SLC38A9	0	0.27	0.117698	0.31
p2@MFAP2 [rs9435732]			p2@MFAP2 [rs9435732]	rs9435732	chr1:17308057..17308149,-	p2@MFAP2	0	0.35	0.0197925	0.09
		rs9435732:rs732679 D'=0.64; rsquared=0.26. chr1:17371735..17371757,- [rs732679, rs10887994]; rs9435732:rs10887994 D'=0.95; rsquared=0.35. chr1:17371735..17371757,- [rs732679, rs10887994]	chr1:17371735..17371757,- [rs732679, rs10887994]	rs732679, rs10887994	chr1:17371735..17371757,-	chr1:17371735..17371757,-	0	0.13	0.513451	0.72
p@chr13:92001646..92001654,+ [rs4284505]			p@chr13:92001646..92001654,+ [rs4284505]	rs4284505	chr13:92001646..92001654,+	chr13:92001257..92001286,-, p@chr13:92001646..92001654,+	0	0.35	0.0197925	0.09
p1@ENST00000544890 [rs6633]			p1@ENST00000544890 [rs6633]	rs6633	chr12:123745847..123745904,-	p1@ENST00000544890, chr12:123745907..123746008,-	0	0.35	0.0227709	0.1
		rs6633:rs12817892 D'=1.0; rsquared=1.0. p1@ENST00000545406 [rs12817892]	p1@ENST00000545406 [rs12817892]	rs12817892	chr12:123728548..123728574,-	p1@ENST00000545406	0	0.09	0.677364	0.83
enhancer@chr13:51103280-51103738 [rs536338]			enhancer@chr13:51103280-51103738 [rs536338]	rs536338	chr13:51103280-51103738	enhancer@chr13:51103280-51103738	0	0.35	0.022867	0.1
chr6:81442621..81442640,+ [rs11756729]			chr6:81442621..81442640,+ [rs11756729]	rs11756729, rs7773045	chr6:81442621..81442640,+	chr6:81442621..81442640,+, enhancer@chr6:81443202-81443816	0	0.34	0.0281514	0.12
p@chr15:84408895..84408904,+ [rs1426160]			p@chr15:84408895..84408904,+ [rs1426160]	rs1426160	chr15:84408895..84408904,+	p@chr15:84408895..84408904,+	0	0.34	0.0292083	0.12
chr6:32148013..32148032,+ [rs3134943]			chr6:32148013..32148032,+ [rs3134943]	rs2071295, rs8111, rs3131283, rs2269424, rs1061807, rs3134943	chr6:32148013..32148032,+	enhancer@chr6:32038612-32038798, p3@TNXB, p1@PRRT1, p3@PRRT1, p4@EGFL8, chr6:32136781..32136802,-, chr6:32148013..32148032,+	0	0.33	0.0349731	0.15
chr6:31237739..31237758,+ [rs9264606, rs9264608]			chr6:31237739..31237758,+ [rs9264606, rs9264608]	rs9263879, rs9263957, rs3869109, rs2001181, rs9264594, rs9264606, rs9264608, rs9264664, rs7767581, rs2844622, rs5010528, rs2596501, rs1058026, rs2770, rs6911024, rs2523452	chr6:31237739..31237758,+	p@chr6:31171864..31171888,+, p@chr6:31184194..31184242,+, p@chr6:31184444..31184457,+, p@chr6:31236747..31236823,-, chr6:31237739..31237758,+, p12@HLA-C, p5@HLA-C, p6@HLA-C, p@chr6:31239406..31239455,+, p1@HLA-C, p@chr6:31240053..31240069,+, p@chr6:31240851..31240879,-, p@chr6:31321095..31321105,-, p3@X07061,p3@X07062, p2@X07061,p2@X07062, p1@X07061,p1@X07062, p2@HCP5	0	0.33	0.0443889	0.18
p@chr5:33229308..33229311,- [rs7443939]			p@chr5:33229308..33229311,- [rs7443939]	rs7443939, rs4498262	chr5:33229308..33229311,-	p@chr5:33229308..33229311,-, p2@ENST00000503577	0	0.32	0.049289	0.19
p3@PMPCA [rs3812584]			p3@PMPCA [rs3812584]	rs3812584	chr9:139313013..139313034,+	p3@PMPCA	0	0.32	0.0495772	0.19
		same SNP, different promoter: p4@PMPCA [rs3812584]	p4@PMPCA [rs3812584]	rs3812584	chr9:139312981..139312986,+	p4@PMPCA	0	0.08	0.705899	0.84
enhancer@chr20:34471781-34472424 [rs3787173]			enhancer@chr20:34471781-34472424 [rs3787173]	rs3787173	chr20:34471781-34472424	enhancer@chr20:34471781-34472424	0	0.31	0.0567832	0.21
		rs3787173:rs11699815 D'=1.0; rsquared=1.0. p7@SCAND1 [rs11699815]	p7@SCAND1 [rs11699815]	rs11699815	chr20:34542920..34542943,-	p7@SCAND1	0	0.11	0.611645	0.8
p6@ACSS2 [rs3818273]			p6@ACSS2 [rs3818273]	rs3818273	chr20:33509208..33509220,+	p6@ACSS2	0	0.31	0.0578401	0.21
		rs3818273:rs6120778 D'=1.0; rsquared=0.75. p9@MYH7B [rs6120778]	p9@MYH7B [rs6120778]	rs6120778	chr20:33565465..33565475,+	p7@MYH7B, p6@MYH7B, p10@MYH7B, p9@MYH7B	0	0	0.990488	1
p@chr5:134364600..134364638,- [rs479632]			p@chr5:134364600..134364638,- [rs479632]	rs479632	chr5:134364600..134364638,-	p@chr5:134364600..134364638,-	0	0.31	0.0588009	0.21
p@chr5:32829061..32829092,+ [rs7733331]			p@chr5:32829061..32829092,+ [rs7733331]	rs1421811, rs7733331	chr5:32829061..32829092,+	enhancer@chr5:32714238-32714628, p@chr5:32829061..32829092,+	0	0.31	0.067256	0.23
enhancer@chr19:2182828-2183132 [rs12609327]			enhancer@chr19:2182828-2183132 [rs12609327]	rs12983458, rs1015670, rs12609327	chr19:2182828-2183132	enhancer@chr19:2168320-2168637, p@chr19:2168550..2168572,+, p@chr19:2168580..2168592,+, p@chr19:2168627..2168637,+, enhancer@chr19:2171377-2171588, enhancer@chr19:2182828-2183132	0	0.3	0.0716756	0.24
enhancer@chr10:80918312-80918688 [rs779932, rs779933]			enhancer@chr10:80918312-80918688 [rs779932, rs779933]	rs779932, rs779933, rs697241	chr10:80918312-80918688	enhancer@chr10:80918312-80918688, p8@ZMIZ1	0	0.3	0.0724443	0.24
p3@ANP32E [rs6679147]			p3@ANP32E [rs6679147]	rs6679147	chr1:150192499..150192512,-	p3@ANP32E	0	0.3	0.0798424	0.26
p4@EHMT2 [rs7887]			p4@EHMT2 [rs7887]	rs605203, rs535586, rs7887	chr6:31864456..31864473,-	p1@SLC44A4, p@chr6:31860322..31860338,-, p4@EHMT2	0	0.29	0.084166	0.27
		rs7887:rs2072633 D'=0.74; rsquared=0.19. p37@CFB [rs2072633]	p37@CFB [rs2072633]	rs2072633	chr6:31919711..31919718,+	p37@CFB	0	0.1	0.638836	0.8
p5@NARFL [rs12597563]			p5@NARFL [rs12597563]	rs12597563	chr16:787771..787781,-	p2@NARFL, p5@NARFL	0	0.29	0.0846464	0.27
p5@ITCH [rs6579167]			p5@ITCH [rs6579167]	rs2184836, rs2225837, rs6579167, rs6059878, rs6059887, rs6058070, rs8116198	chr20:33033114..33033125,+	p@chr20:32963536..32963540,+, p@chr20:33005531..33005535,+, p5@ITCH, p@chr20:33087112..33087113,+, enhancer@chr20:33100877-33101215, p@chr20:33103404..33103422,+, p@chr20:33114311..33114314,+	0	0.29	0.0864719	0.27
p@chr5:131541116..131541121,- [rs10075459]			p@chr5:131541116..131541121,- [rs10075459]	rs10075459	chr5:131541116..131541121,-	p@chr5:131541116..131541121,-	0	0.29	0.0878171	0.27
enhancer@chr6:7692548-7692711 [rs7756651]			enhancer@chr6:7692548-7692711 [rs7756651]	rs7756651, rs911748	chr6:7692548-7692711	enhancer@chr6:7692548-7692711, p@chr6:7698781..7698794,+, p@chr6:7698822..7698832,+	0	0.29	0.0942544	0.28
p@chr6:7786714..7786717,+ [rs5009024]			p@chr6:7786714..7786717,+ [rs5009024]	rs5009024	chr6:7786714..7786717,+	p@chr6:7786714..7786717,+	0	0.28	0.0956956	0.28
p@chr20:33734472..33734476,- [rs1415771]			p@chr20:33734472..33734476,- [rs1415771]	rs1415771, rs945959	chr20:33734472..33734476,-	p@chr20:33734472..33734476,-, p4@EDEM2	0	0.28	0.104535	0.3
enhancer@chr3:136492102-136492187 [rs9819856]			enhancer@chr3:136492102-136492187 [rs9819856]	rs9819856	chr3:136492102-136492187	enhancer@chr3:136492102-136492187	0	0.28	0.107321	0.3
p3@TNPO1 [rs34651]			p3@TNPO1 [rs34651]	rs34651	chr5:72143988..72144006,+	p5@TNPO1, p1@TNPO1, p3@TNPO1	0	0.28	0.109627	0.3
enhancer@chr11:12697923-12698543 [rs7926971]			enhancer@chr11:12697923-12698543 [rs7926971]	rs7926971, rs7949728, rs7949010, rs7935997, rs6486059	chr11:12697923-12698543	enhancer@chr11:12697923-12698543, p@chr11:12728684..12728687,+, enhancer@chr11:12824175-12824668	0	0.28	0.110684	0.3
p@chr10:81113959..81113978,+ [rs7332]			p@chr10:81113959..81113978,+ [rs7332]	rs7332	chr10:81113959..81113978,+	p@chr10:81113959..81113978,+	0	0.27	0.117794	0.31
enhancer@chr15:99214674-99215061 [rs2311767]			enhancer@chr15:99214674-99215061 [rs2311767]	rs2871865, rs2311767	chr15:99214674-99215061	chr15:99195137..99195161,+, enhancer@chr15:99214674-99215061	0	0.27	0.124039	0.32
enhancer@chr3:13555627-13555924 [rs2597513, rs2655226]			enhancer@chr3:13555627-13555924 [rs2597513, rs2655226]	rs2597513, rs2655226	chr3:13555627-13555924	enhancer@chr3:13555627-13555924	0	0.27	0.125673	0.32
p@chr12:123616405..123616412,- [rs1727294]			p@chr12:123616405..123616412,- [rs1727294]	rs655293, rs7964876, rs1727294, rs884548	chr12:123616405..123616412,-	enhancer@chr12:123528001-123528432, p@chr12:123528254..123528260,-, enhancer@chr12:123558604-123558942, enhancer@chr12:123616405-123617083, p@chr12:123616405..123616412,-, p@chr12:123634313..123634322,+	0	0.27	0.129228	0.32
p10@SCUBE3 [rs2071920]			p10@SCUBE3 [rs2071920]	rs3800398, rs1888822, rs2071920, rs4713845, rs9380501	chr6:35216360..35216374,+	enhancer@chr6:35159725-35159966, enhancer@chr6:35182884-35183485, p10@SCUBE3, enhancer@chr6:35228332-35228733, enhancer@chr6:35270455-35270931, p@chr6:35270867..35270878,+	0	0.26	0.134128	0.33
		rs2071920:rs6899744 D'=1.0; rsquared=0.05. p@chr6:35286250..35286262,+ [rs6899744]	p@chr6:35286250..35286262,+ [rs6899744]	rs6899744	chr6:35286250..35286262,+	p@chr6:35286250..35286262,+	0	0.24	0.197348	0.41
enhancer@chr5:54886412-54886788 [rs1983189]			enhancer@chr5:54886412-54886788 [rs1983189]	rs1983189	chr5:54886412-54886788	enhancer@chr5:54886412-54886788	0	0.26	0.143832	0.35
		rs1983189:rs3936310 D'=0.89; rsquared=0.64. enhancer@chr5:54896440-54896979 [rs3936310]	enhancer@chr5:54896440-54896979 [rs3936310]	rs3936310	chr5:54896440-54896979	enhancer@chr5:54896440-54896979	0	0.13	0.518351	0.72
p5@NOS3 [rs743507]			p5@NOS3 [rs743507]	rs743507	chr7:150707617..150707643,+	p5@NOS3, p6@NOS3	0	0.26	0.149212	0.35
p@chr17:30326770..30326783,+ [rs537166]			p@chr17:30326770..30326783,+ [rs537166]	rs537166	chr17:30326770..30326783,+	p@chr17:30326770..30326783,+	0	0.25	0.154304	0.36
enhancer@chr5:32768263-32768639 [rs3792752]			enhancer@chr5:32768263-32768639 [rs3792752]	rs3792752	chr5:32768263-32768639	enhancer@chr5:32768263-32768639	0	0.25	0.156226	0.36
enhancer@chr1:23448967-23449247 [rs1571466]			enhancer@chr1:23448967-23449247 [rs1571466]	rs1571466	chr1:23448967-23449247	enhancer@chr1:23448967-23449247	0	0.25	0.162471	0.37
		rs1571466:rs2806561 D'=1.0; rsquared=1.0. p3@LUZP1 [rs2806561]	p3@LUZP1 [rs2806561]	rs2806561	chr1:23504597..23504621,-	p3@LUZP1	0	0.13	0.527863	0.73
p@chr6:32575596..32575598,- [rs9461776]			p@chr6:32575596..32575598,- [rs9461776]	rs9461776	chr6:32575596..32575598,-	p@chr6:32575596..32575598,-	0	0.24	0.172463	0.39
enhancer@chr9:95288173-95288480 [rs4744137]			enhancer@chr9:95288173-95288480 [rs4744137]	rs4744137	chr9:95288173-95288480	enhancer@chr9:95288173-95288480	0	0.24	0.175346	0.39
p@chr19:7184803..7184814,- [rs891088]			p@chr19:7184803..7184814,- [rs891088]	rs891088	chr19:7184803..7184814,-	p@chr19:7184762..7184771,-, p@chr19:7184803..7184814,-, p@chr19:7184828..7184838,-	0	0.24	0.190911	0.41
p@chr6:142702634..142702638,+ [rs7757571]			p@chr6:142702634..142702638,+ [rs7757571]	rs7757571	chr6:142702634..142702638,+	p@chr6:142702634..142702638,+	0	0.24	0.193889	0.41
p@chr1:172134755..172134764,+ [rs537444]			p@chr1:172134755..172134764,+ [rs537444]	rs537444	chr1:172134755..172134764,+	p@chr1:172134755..172134764,+	0	0.23	0.200999	0.42
		same SNP, different promoter: p@chr1:172134736..172134739,+ [rs537444]	p@chr1:172134736..172134739,+ [rs537444]	rs537444	chr1:172134736..172134739,+	p@chr1:172134667..172134711,+, p@chr1:172134736..172134739,+	0	0.1	0.628075	0.8
p@chr12:56727954..56727978,+ [rs2371494]			p@chr12:56727954..56727978,+ [rs2371494]	rs2371494, rs2066818	chr12:56727954..56727978,+	p1@PAN2, p@chr12:56727954..56727978,+, p@chr12:56753722..56753726,-, p1@STAT2	0	0.23	0.203017	0.42
enhancer@chr8:135628946-135629314 [rs7010948, rs7011157]			enhancer@chr8:135628946-135629314 [rs7010948, rs7011157]	rs7010948, rs7011157	chr8:135628946-135629314	enhancer@chr8:135628946-135629314	0	0.23	0.216949	0.44
		rs7010948:rs894344 D'=0.89; rsquared=0.59. p@chr8:135612764..135612786,- [rs894344]; rs7011157:rs894344 D'=0.89; rsquared=0.59. p@chr8:135612764..135612786,- [rs894344]	p@chr8:135612764..135612786,- [rs894344]	rs894344	chr8:135612764..135612786,-	p@chr8:135612764..135612786,-	0	0.18	0.338201	0.56
p1@C20orf173 [rs6060450]			p1@C20orf173 [rs6060450]	rs6060450	chr20:34117447..34117481,-	p1@C20orf173	0	0.23	0.218005	0.44
p13@TGFB2 [rs991967]			p13@TGFB2 [rs991967]	rs991967, rs1418556	chr1:218615509..218615516,+	p13@TGFB2, p19@TGFB2	0	0.22	0.23136	0.46
p@chr20:33356385..33356390,- [rs2295353]			p@chr20:33356385..33356390,- [rs2295353]	rs910869, rs910870, rs6060003, rs2295353	chr20:33356385..33356390,-	p@chr20:33293061..33293072,+, p@chr20:33293077..33293086,+, enhancer@chr20:33294754-33295084, p@chr20:33356385..33356390,-	0	0.22	0.240968	0.47
p@chr13:33232408..33232414,+ [rs2301393, rs7335546]			p@chr13:33232408..33232414,+ [rs2301393, rs7335546]	rs2301393, rs7335546, rs9596075, rs3492	chr13:33232408..33232414,+	p@chr13:33232408..33232414,+, p@chr13:33266578..33266582,+, p@chr13:33349249..33349253,+	0	0.21	0.249904	0.48
p@chr12:93967885..93967910,+ [rs3782415]			p@chr12:93967885..93967910,+ [rs3782415]	rs3782415	chr12:93967885..93967910,+	p@chr12:93967700..93967714,-, p@chr12:93967885..93967910,+, p@chr12:93967919..93967936,+, p@chr12:93968004..93968009,+	0	0.21	0.255765	0.49
enhancer@chr5:131406243-131406684 [rs721121]			enhancer@chr5:131406243-131406684 [rs721121]	rs721121	chr5:131406243-131406684	enhancer@chr5:131406243-131406684, p@chr5:131406570..131406590,+	0	0.21	0.26201	0.49
p@chr19:3434311..3434347,+ [rs2074977]			p@chr19:3434311..3434347,+ [rs2074977]	rs7507204, rs2074977	chr19:3434311..3434347,+	enhancer@chr19:3428769-3429112, p@chr19:3434311..3434347,+	0	0.21	0.26422	0.49
enhancer@chr1:77980165-77980378 [rs12729914]			enhancer@chr1:77980165-77980378 [rs12729914]	rs12729914	chr1:77980165-77980378	enhancer@chr1:77980165-77980378	0	0.21	0.26422	0.49
enhancer@chr2:25457688-25458068 [rs11695471]			enhancer@chr2:25457688-25458068 [rs11695471]	rs11695471	chr2:25457688-25458068	enhancer@chr2:25457688-25458068	0	0.21	0.268543	0.49
		rs11695471:rs7594432 D'=1.0; rsquared=0.35. enhancer@chr2:25482494-25482888 [rs7594432]	enhancer@chr2:25482494-25482888 [rs7594432]	rs7594432	chr2:25482494-25482888	enhancer@chr2:25482494-25482888	0	0.17	0.376441	0.6
p13@ESR1 [rs2077647]			p13@ESR1 [rs2077647]	rs2077647	chr6:152129265..152129276,+	p13@ESR1	0	0.2	0.277383	0.5
enhancer@chr7:2749963-2750288 [rs7798875]			enhancer@chr7:2749963-2750288 [rs7798875]	rs7798875, rs7803527, rs798518, rs798517, rs798494, rs798488, rs7807978, rs997496, rs2644295, rs1182175, rs1636249	chr7:2749963-2750288	enhancer@chr7:2749963-2750288, enhancer@chr7:2750956-2751140, p@chr7:2778019..2778050,+, p@chr7:2798080..2798106,-, p@chr7:2802438..2802450,+, p@chr7:2814742..2814772,+, enhancer@chr7:2843425-2843709, enhancer@chr7:2860040-2860490, enhancer@chr7:2875013-2875360, p1@GNA12	0	0.2	0.279977	0.5
enhancer@chr6:131327805-131328036 [rs6921207]			enhancer@chr6:131327805-131328036 [rs6921207]	rs6921207	chr6:131327805-131328036	enhancer@chr6:131327805-131328036	0	0.2	0.284204	0.5
p@chr3:171965372..171965436,+ [rs1039027]			p@chr3:171965372..171965436,+ [rs1039027]	rs1039027	chr3:171965372..171965436,+	p@chr3:171965372..171965436,+	0	0.2	0.29852	0.52
enhancer@chr12:94178297-94178734 [rs10859579]			enhancer@chr12:94178297-94178734 [rs10859579]	rs10859571, rs10437877, rs903173, rs10859579, rs10859582	chr12:94178297-94178734	p@chr12:94157973..94157976,+, enhancer@chr12:94158186-94158524, enhancer@chr12:94178297-94178734, p@chr12:94180927..94180931,+	0	0.19	0.305822	0.53
p@chr12:11898277..11898290,+ [rs1009954]			p@chr12:11898277..11898290,+ [rs1009954]	rs2856344, rs1009953, rs1009954	chr12:11898277..11898290,+	p@chr12:11891065..11891095,+, enhancer@chr12:11893113-11893308, p@chr12:11898277..11898290,+	0	0.19	0.313701	0.54
p10@FAM134A [rs3210652]			p10@FAM134A [rs3210652]	rs3210652	chr2:220046914..220046929,+	p10@FAM134A, p1@BC111856	0	0.19	0.316391	0.54
enhancer@chr14:68699331-68699744 [rs1314913]			enhancer@chr14:68699331-68699744 [rs1314913]	rs1314913	chr14:68699331-68699744	enhancer@chr14:68699331-68699744	0	0.19	0.333013	0.56
p@chr18:46582506..46582523,+ [rs16950294, rs16950298, rs16950303]			p@chr18:46582506..46582523,+ [rs16950294, rs16950298, rs16950303]	rs11082726, rs16950294, rs16950298, rs16950303	chr18:46582506..46582523,+	enhancer@chr18:46557935-46558394, enhancer@chr18:46582084-46582553, p@chr18:46582277..46582288,-, p@chr18:46582302..46582324,-, p@chr18:46582337..46582366,-, p@chr18:46582506..46582523,+, p@chr18:46582525..46582553,+	0	0.18	0.360588	0.59
enhancer@chr20:6594261-6594618 [rs6038557, rs6054392]			enhancer@chr20:6594261-6594618 [rs6038557, rs6054392]	rs6038557, rs6054392	chr20:6594261-6594618	enhancer@chr20:6594261-6594618	0	0.18	0.361453	0.59
enhancer@chr2:88899554-88899981 [rs1913671]			enhancer@chr2:88899554-88899981 [rs1913671]	rs1913671	chr2:88899554-88899981	enhancer@chr2:88899554-88899981	0	0.17	0.36568	0.59
p@chr6:26500524..26500540,+ [rs13194984]			p@chr6:26500524..26500540,+ [rs13194984]	rs13194984	chr6:26500524..26500540,+	p@chr6:26500524..26500540,+	0	0.17	0.375192	0.6
enhancer@chr17:61639369-61639739 [rs9906747]			enhancer@chr17:61639369-61639739 [rs9906747]	rs9906747	chr17:61639369-61639739	enhancer@chr17:61639369-61639739	0	0.17	0.386722	0.61
p2@SLFNL1 [rs17357954]			p2@SLFNL1 [rs17357954]	rs17357954	chr1:41487421..41487426,-	p1@SLFNL1, p2@SLFNL1	0	0.17	0.395753	0.61
p@chr6:35765153..35765158,+ [rs2766597]			p@chr6:35765153..35765158,+ [rs2766597]	rs2817017, rs2766597	chr6:35765153..35765158,+	p@chr6:35762794..35762810,-, p@chr6:35762867..35762888,+, p@chr6:35762894..35762939,+, p@chr6:35762947..35762969,+, p1@CLPS, p@chr6:35765153..35765158,+	0	0.17	0.396426	0.61
p@chr6:32412808..32412821,- [rs3135388]			p@chr6:32412808..32412821,- [rs3135388]	rs3135391, rs3135388	chr6:32412808..32412821,-	p4@HLA-DQA1, p@chr6:32411003..32411021,-, p@chr6:32411062..32411086,-, p3@HLA-DQA1, p6@HLA-DQA1, p10@HLA-DQA1, p@chr6:32412808..32412821,-	0	0.16	0.403055	0.61
p@chr15:84295121..84295125,+ [rs2585070]			p@chr15:84295121..84295125,+ [rs2585070]	rs2585070	chr15:84295121..84295125,+	p@chr15:84295121..84295125,+	0	0.16	0.41151	0.62
enhancer@chr13:51210187-51210463 [rs7991818]			enhancer@chr13:51210187-51210463 [rs7991818]	rs7991818	chr13:51210187-51210463	enhancer@chr13:51210187-51210463	0	0.16	0.415065	0.62
p4@SLC3A1 [rs3738985]			p4@SLC3A1 [rs3738985]	rs3738985	chr2:44502711..44502719,+	p4@SLC3A1	0	0.16	0.430342	0.63
enhancer@chr2:233181304-233181393 [rs6743962]			enhancer@chr2:233181304-233181393 [rs6743962]	rs6743962	chr2:233181304-233181393	enhancer@chr2:233181304-233181393	0	0.16	0.435626	0.63
enhancer@chr20:47471567-47471956 [rs6012541, rs6095329]			enhancer@chr20:47471567-47471956 [rs6012541, rs6095329]	rs6012541, rs6095329	chr20:47471567-47471956	enhancer@chr20:47471567-47471956	0	0.15	0.446964	0.65
		rs6012541:rs752421 D'=0.98; rsquared=0.95. enhancer@chr20:47434951-47435381 [rs752421]; rs6095329:rs752421 D'=0.98; rsquared=0.95. enhancer@chr20:47434951-47435381 [rs752421]	enhancer@chr20:47434951-47435381 [rs752421]	rs752421	chr20:47434951-47435381	enhancer@chr20:47434951-47435381	0	0.07	0.740008	0.85
enhancer@chr11:65248969-65249218 [rs1787666]			enhancer@chr11:65248969-65249218 [rs1787666]	rs1787666	chr11:65248969-65249218	enhancer@chr11:65248969-65249218	0	0.15	0.459935	0.66
p@chr7:20392799..20392811,+ [rs2214442]			p@chr7:20392799..20392811,+ [rs2214442]	rs2214442	chr7:20392799..20392811,+	p@chr7:20392799..20392811,+	0	0.13	0.516718	0.72
p@chr9:98245687..98245692,- [rs17369383]			p@chr9:98245687..98245692,- [rs17369383]	rs17369383, rs473902	chr9:98245687..98245692,-	p@chr9:98245687..98245692,-, p@chr9:98256475..98256486,+	0	0.13	0.531418	0.73
enhancer@chr15:70047760-70048370 [rs10152590, rs10152591]			enhancer@chr15:70047760-70048370 [rs10152590, rs10152591]	rs10152590, rs10152591	chr15:70047760-70048370	enhancer@chr15:70047760-70048370, p@chr15:70047915..70047929,-, p@chr15:70048070..70048094,-	0	0.12	0.565046	0.76
enhancer@chr2:25136821-25136958 [rs10203386]			enhancer@chr2:25136821-25136958 [rs10203386]	rs10203386	chr2:25136821-25136958	enhancer@chr2:25136821-25136958	0	0.12	0.577729	0.77
		rs10203386:rs9631062 D'=0.96; rsquared=0.52. p@chr2:25110228..25110248,+ [rs9631062]	p@chr2:25110228..25110248,+ [rs9631062]	rs7567997, rs11892869, rs7580081, rs2033656, rs2033655, rs10195271, rs9631062	chr2:25110228..25110248,+	enhancer@chr2:25096617-25097268, p10@ADCY3, enhancer@chr2:25108646-25108862, p@chr2:25110043..25110059,-, p@chr2:25110228..25110248,+	0	0.09	0.656899	0.81
p@chr1:184128142..184128173,+ [rs6424925]			p@chr1:184128142..184128173,+ [rs6424925]	rs6424925	chr1:184128142..184128173,+	enhancer@chr1:184128022-184128982, p@chr1:184128142..184128173,+, p@chr1:184128188..184128200,-, p@chr1:184128363..184128395,+	0	0.11	0.581956	0.77
chr5:168233584..168233600,- [rs17553840]			chr5:168233584..168233600,- [rs17553840]	rs17553840	chr5:168233584..168233600,-	chr5:168233584..168233600,-	0	0.1	0.627882	0.8
		rs17553840:rs17635284 D'=1.0; rsquared=1.0. p@chr5:168246378..168246386,+ [rs17635284]	p@chr5:168246378..168246386,+ [rs17635284]	rs17635284	chr5:168246378..168246386,+	p@chr5:168246378..168246386,+	0	0.02	0.949942	0.98
p9@ITIH4 [rs13072536]			p9@ITIH4 [rs13072536]	rs2276817, rs13072536	chr3:52861162..52861170,-	p@chr3:52860633..52860642,-, p@chr3:52860656..52860666,-, p2@ITIH4, p9@ITIH4	0	0.1	0.62942	0.8
p1@C2CD4A [rs8039105]			p1@C2CD4A [rs8039105]	rs8039105	chr15:62359175..62359179,+	p1@C2CD4A	0	0.1	0.632975	0.8
p@chr6:76415669..76415672,+ [rs9343320]			p@chr6:76415669..76415672,+ [rs9343320]	rs9343320	chr6:76415669..76415672,+	p@chr6:76415669..76415672,+	0	0.1	0.638547	0.8
p4@MICAL1 [rs2277113]			p4@MICAL1 [rs2277113]	rs2277113	chr6:109775447..109775474,-	p4@MICAL1, p8@MICAL1	0	0.1	0.646138	0.81
		rs2277113:rs9398202 D'=1.0; rsquared=0.88. enhancer@chr6:109780095-109780443 [rs9398202]	enhancer@chr6:109780095-109780443 [rs9398202]	rs9398202	chr6:109780095-109780443	enhancer@chr6:109780095-109780443	0	0.07	0.73847	0.85
enhancer@chr3:135861520-135861675 [rs9881400]			enhancer@chr3:135861520-135861675 [rs9881400]	rs9881400	chr3:135861520-135861675	enhancer@chr3:135861520-135861675	0	0.09	0.692929	0.84
p@chr1:149875845..149875874,- [rs7534365]			p@chr1:149875845..149875874,- [rs7534365]	rs7534365	chr1:149875845..149875874,-	p@chr1:149875845..149875874,-	0	0.08	0.698117	0.84
enhancer@chr11:48102794-48103200 [rs6485807]			enhancer@chr11:48102794-48103200 [rs6485807]	rs7934659, rs6485807	chr11:48102794-48103200	chr11:48066327..48066358,+, enhancer@chr11:48102794-48103200	0	0.08	0.704458	0.84
p8@PRKG2 [rs788861]			p8@PRKG2 [rs788861]	rs788861	chr4:82136547..82136556,-	p3@PRKG2, p2@PRKG2, p1@PRKG2, p9@PRKG2, p13@PRKG2, p5@PRKG2, p8@PRKG2	0	0.08	0.704842	0.84
p@chr5:131675781..131675785,+ [rs272872]			p@chr5:131675781..131675785,+ [rs272872]	rs272872	chr5:131675781..131675785,+	p@chr5:131675781..131675785,+	0	0.08	0.710992	0.84
p@chr6:6884633..6884678,- [rs4960263]			p@chr6:6884633..6884678,- [rs4960263]	rs4960263	chr6:6884633..6884678,-	enhancer@chr6:6884588-6884911, p@chr6:6884633..6884678,-	0	0.08	0.718294	0.84
enhancer@chr20:34689096-34689267 [rs2746102]			enhancer@chr20:34689096-34689267 [rs2746102]	rs2746102	chr20:34689096-34689267	enhancer@chr20:34689096-34689267	0	0.07	0.760377	0.86
p@chr3:11643506..11643527,- [rs2276749]			p@chr3:11643506..11643527,- [rs2276749]	rs2345339, rs2276749	chr3:11643506..11643527,-	p@chr3:11632954..11632958,-, p@chr3:11643506..11643527,-	0	0.06	0.773059	0.87
p@chr2:219610047..219610074,- [rs2272189]			p@chr2:219610047..219610074,- [rs2272189]	rs2272189	chr2:219610047..219610074,-	p@chr2:219610047..219610074,-, p4@TTLL4, p10@TTLL4	0	0.06	0.792179	0.88
p@chr5:179737830..179737831,- [rs888926]			p@chr5:179737830..179737831,- [rs888926]	rs888926	chr5:179737830..179737831,-	p@chr5:179737830..179737831,-	0	0.05	0.818793	0.91
enhancer@chr6:34358644-34359014 [rs3798564]			enhancer@chr6:34358644-34359014 [rs3798564]	rs3798564	chr6:34358644-34359014	enhancer@chr6:34358644-34359014	0	0.05	0.82475	0.91
p2@ENST00000473753 [rs11049416]			p2@ENST00000473753 [rs11049416]	rs11049416, rs11049476, rs11049488	chr12:28343259..28343287,-	p2@ENST00000473753, p3@CCDC91, p1@CCDC91, p2@CCDC91, p@chr12:28397458..28397462,+, chr12:28412415..28412417,+	0	0.05	0.838394	0.91
enhancer@chr7:28122864-28123088 [rs10951191]			enhancer@chr7:28122864-28123088 [rs10951191]	rs10951191	chr7:28122864-28123088	enhancer@chr7:28122864-28123088	0	0.04	0.862125	0.93
p6@CCDC91 [rs10843172]			p6@CCDC91 [rs10843172]	rs10843172	chr12:28605426..28605440,+	p6@CCDC91	0	0.04	0.870292	0.93
p@chr9:139118938..139118947,- [rs10858250]			p@chr9:139118938..139118947,- [rs10858250]	rs10858250	chr9:139118938..139118947,-	p@chr9:139118938..139118947,-	0	0.04	0.878555	0.93
p3@HCG22 [rs4713429, rs9262615]			p3@HCG22 [rs4713429, rs9262615]	rs4713429, rs9262615	chr6:31021225..31021239,+	p3@HCG22	0	0.04	0.886722	0.93
		rs4713429:rs7744253 D'=0.94; rsquared=0.86. p@chr6:31023284..31023287,- [rs7744253]; rs9262615:rs7744253 D'=0.92; rsquared=0.84. p@chr6:31023284..31023287,- [rs7744253]	p@chr6:31023284..31023287,- [rs7744253]	rs7744253	chr6:31023284..31023287,-	p@chr6:31023284..31023287,-	0	0.03	0.917948	0.96
chr17:21279520..21279522,+ [rs7213608]			chr17:21279520..21279522,+ [rs7213608]	rs7213608	chr17:21279520..21279522,+	chr17:21279520..21279522,+	0	0.02	0.939662	0.97
p2@SOCS5 [rs3829835]			p2@SOCS5 [rs3829835]	rs3829835	chr2:46926048..46926095,+	p2@SOCS5	0	0.01	0.972137	0.99
p@chr20:34820071..34820089,+ [rs3813918]			p@chr20:34820071..34820089,+ [rs3813918]	rs3813918	chr20:34820071..34820089,+	p@chr20:34820071..34820089,+	0	0.01	0.981264	0.99
p@chr15:100749314..100749319,- [rs5026360]			p@chr15:100749314..100749319,- [rs5026360]	rs5026360	chr15:100749314..100749319,-	p@chr15:100749314..100749319,-	0	0	1	1
HDL cholesterol
Top promoter[SNPs in top promoter]		Linkage	Top promoter[SNPs in top promoter]	promoter snps in region	chosen promoter id	promoters	original p	Corrected coexpression score	raw p(perm)	FDR
p@chr9:107669326..107669336,+ [rs4100654, rs13284054]			p@chr9:107669326..107669336,+ [rs4100654, rs13284054]	rs2000069, rs4149267, rs1800978, rs3905001, rs4100654, rs2575879, rs2777794, rs13284054, rs2515616, rs1800977	chr9:107669326..107669336,+	enhancer@chr9:107635337-107635884, p@chr9:107635759..107635781,+, p@chr9:107635820..107635841,+, p10@ABCA1, p11@ABCA1, p3@ABCA1, p5@ABCA1, p7@ABCA1, p@chr9:107667895..107667910,-, p@chr9:107667938..107667949,-, enhancer@chr9:107668768-107669725, p@chr9:107668768..107668795,-, p@chr9:107669028..107669032,-, p@chr9:107669218..107669251,+, p@chr9:107669298..107669311,+, p@chr9:107669326..107669336,+…	0	0.71	0	0
p2@ENST00000518619 [rs9987289, rs4841132]			p2@ENST00000518619 [rs9987289, rs4841132]	rs9987289, rs17149760, rs4841132	chr8:9183625..9183635,+	p1@ENST00000518619, p2@ENST00000518619	0	0.67	0	0
		rs9987289:rs7357361 D'=1.0; rsquared=0.57. enhancer@chr8:9219931-9220273 [rs7357361]; rs4841132:rs7357361 D'=1.0; rsquared=0.57. enhancer@chr8:9219931-9220273 [rs7357361]	enhancer@chr8:9219931-9220273 [rs7357361]	rs7357361	chr8:9219931-9220273	enhancer@chr8:9219931-9220273	0	0.1	0.617214	0.76
chr11:47281010..47281020,+ [rs11039155]			chr11:47281010..47281020,+ [rs11039155]	rs4319472, rs2018527, rs747650, rs75393320, rs2242262, rs2242261, rs2167079, rs3758673, rs11039155, rs1449626, rs1449627, rs10742799, rs326217, rs10769255, rs11039197, rs181832479, rs35600396, rs1542321, rs190503781, rs10734557, rs3740689, rs7105851, rs4752992, rs4752993, rs10769262, rs11605672, rs78524236, rs12798982, rs4752999, rs7948705, rs4752843	chr11:47281010..47281020,+	enhancer@chr11:47109490-47109615, p@chr11:47109565..47109602,-, p3@C11orf49, chr11:47266566..47266582,-, p1@ACP2, p2@NR1H3, p4@NR1H3, p10@NR1H3, chr11:47281010..47281020,+, p3@MADD, p2@MADD, p13@MADD, p@chr11:47303410..47303414,+, p@chr11:47367243..47367257,-, p@chr11:47378250..47378262,-, p@chr11:47378273..47378303,+, p@chr11:47378382..47378395,-, p@chr11:47378437..47378450,-, p@chr11:47378460..…	0	0.64	0	0
p13@BC172787 [rs693]			p13@BC172787 [rs693]	rs1801695, rs1042034, rs676210, rs693, rs533617, rs673548, rs1801700, rs1367117	chr2:21232174..21232177,-	p@chr2:21224617..21224627,-, p@chr2:21224794..21224805,-, p@chr2:21224850..21224851,-, p@chr2:21224881..21224895,-, p@chr2:21224901..21224912,-, p@chr2:21224940..21224950,-, p@chr2:21224999..21225013,-, p@chr2:21225044..21225056,-, p44@APOB, p60@APOB, p3@APOB, p19@APOB, p67@APOB, p84@APOB, p35@APOB, p32@APOB, p20@APOB, p13@APOB, p5@APOB, p7@APOB, p2@BC172787, p5@BC172787, p1@BC172787, p3@BC172787…	0	0.64	0	0
p1@SLC17A3 [rs13198474]			p1@SLC17A3 [rs13198474]	rs13198474	chr6:25874444..25874482,-	p1@SLC17A3, p2@SLC17A3	0	0.6	0	0
p@chr18:47176875..47176889,+ [rs4939886, rs4939887, rs4939888]			p@chr18:47176875..47176889,+ [rs4939886, rs4939887, rs4939888]	rs9958947, rs4245232, rs12955001, rs4939886, rs4939887, rs4939888, rs7238063	chr18:47176875..47176889,+	p4@LIPG, p6@LIPG, p2@LIPG, p@chr18:47139060..47139064,+, p@chr18:47176875..47176889,+, enhancer@chr18:47250062-47250416	0	0.55	0	0
p@chr19:45411878..45411884,- [rs7412]			p@chr19:45411878..45411884,- [rs7412]	rs7412, rs2288911, rs2288912, rs5120, rs7248162, rs3760629	chr19:45411878..45411884,-	p@chr19:45411878..45411884,-, p@chr19:45412009..45412026,+, p3@AJ249921, p3@APOC2, p2@APOC2, p1@APOC2, p6@APOC2, p4@APOC2, enhancer@chr19:45454604-45454881, p@chr19:45458158..45458217,-, p3@CLPTM1, p4@CLPTM1	0	0.52	0.000156495	0
p2@F2 [rs2070852, rs5896]			p2@F2 [rs2070852, rs5896]	rs2070852, rs5896	chr11:46745010..46745020,+	p2@F2	0	0.51	0.000156495	0
		rs2070852:rs4752927 D'=1.0; rsquared=0.29. p@chr11:46702222..46702264,- [rs4752927]; rs5896:rs4752927 D'=1.0; rsquared=0.84. p@chr11:46702222..46702264,- [rs4752927]	p@chr11:46702222..46702264,- [rs4752927]	rs4752927, rs7932354	chr11:46702222..46702264,-	p@chr11:46702222..46702264,-, p1@ARHGAP1, p3@ARHGAP1	0	0.26	0.153991	0.38
p1@APOA5 [rs651821]			p1@APOA5 [rs651821]	rs651821	chr11:116662593..116662620,-	p1@APOA5	0	0.5	0.000312989	0
		rs651821:rs11216164 D'=1.0; rsquared=0.06. p@chr11:116734451..116734464,- [rs11216164]	p@chr11:116734451..116734464,- [rs11216164]	rs11216164	chr11:116734451..116734464,-	p@chr11:116734451..116734464,-	0	0.09	0.675117	0.79
p8@ALDH1A2 [rs1122208]			p8@ALDH1A2 [rs1122208]	rs4544186, rs17240566, rs4774292, rs1122208, rs11637094	chr15:58623617..58623628,-	p@chr15:58445945..58445961,+, p@chr15:58445997..58446018,+, p@chr15:58446250..58446284,+, p@chr15:58448335..58448353,+, enhancer@chr15:58542075-58542356, p8@ALDH1A2, p@chr15:58624491..58624496,+, p@chr15:58624655..58624684,+	0	0.48	0.000625978	0.01
chr8:19824080..19824096,+ [rs1059507, rs3735964]			chr8:19824080..19824096,+ [rs1059507, rs3735964]	rs28522139, rs1800590, rs3779787, rs1534649, rs1801177, rs73667469, rs343, rs303, rs3289, rs1059507, rs3735964	chr8:19824080..19824096,+	p@chr8:19782798..19782817,-, p1@LPL, p2@LPL, p3@LPL, enhancer@chr8:19797796-19798054, enhancer@chr8:19799323-19799727, p@chr8:19799565..19799589,-, chr8:19805701..19805712,+, p@chr8:19805739..19805766,-, p@chr8:19805751..19805767,+, chr8:19810816..19810835,+, chr8:19817317..19817319,+, p@chr8:19823146..19823158,+, p@chr8:19823393..19823436,+, chr8:19824080..19824096,+, chr8:19824121..19824133,+	0	0.48	0.000782473	0.01
		rs3735964:rs1569209 D'=1.0; rsquared=0.87. p@chr8:19830089..19830095,+ [rs1569209]	p@chr8:19830089..19830095,+ [rs1569209]	rs1569209	chr8:19830089..19830095,+	p@chr8:19830089..19830095,+	0	0.29	0.107668	0.29
enhancer@chr7:73037168-73037552 [rs55747707]			enhancer@chr7:73037168-73037552 [rs55747707]	rs55747707	chr7:73037168-73037552	enhancer@chr7:73037168-73037552	0	0.48	0.000782473	0.01
p2@ENST00000519197 [rs28597716]			p2@ENST00000519197 [rs28597716]	rs28597716, rs11204085	chr8:19936775..19936791,+	p3@ENST00000519197, p1@ENST00000519197, p2@ENST00000519197, enhancer@chr8:19940572-19940865	0	0.48	0.000938967	0.01
p@chr2:165603312..165603317,- [rs10178921]			p@chr2:165603312..165603317,- [rs10178921]	rs10178921	chr2:165603312..165603317,-	p@chr2:165603312..165603317,-, p@chr2:165603346..165603357,-	0	0.45	0.00234742	0.02
		rs10178921:rs355894 D'=1.0; rsquared=0.22. enhancer@chr2:165635333-165635585 [rs355894]	enhancer@chr2:165635333-165635585 [rs355894]	rs355894	chr2:165635333-165635585	enhancer@chr2:165635333-165635585	0	0.11	0.58529	0.76
		rs10178921:rs355863 D'=1.0; rsquared=1.0. p10@COBLL1 [rs355863]	p10@COBLL1 [rs355863]	rs355863	chr2:165630270..165630300,-	p10@COBLL1	0	0.1	0.633177	0.77
p@chr8:116588829..116588841,+ [rs2049867]			p@chr8:116588829..116588841,+ [rs2049867]	rs10097784, rs2049867	chr8:116588829..116588841,+	p@chr8:116561894..116561899,-, p@chr8:116588829..116588841,+	0	0.44	0.00344288	0.02
p8@MMP9 [rs2236416]			p8@MMP9 [rs2236416]	rs3746497, rs435306, rs378114, rs2294212, rs2294213, rs11696196, rs13040272, rs3918253, rs2274755, rs17576, rs2236416, rs3918256, rs13925, rs10432735	chr20:44640603..44640610,+	chr20:44509839..44509853,+, p1@ZSWIM1, p@chr20:44538235..44538254,-, p7@PLTP, p3@PLTP, p1@PLTP, p@chr20:44574464..44574477,+, p@chr20:44574497..44574511,+, p@chr20:44574577..44574612,+, p@chr20:44574643..44574652,+, p@chr20:44574660..44574683,+, p@chr20:44574687..44574695,+, enhancer@chr20:44632907-44633142, p@chr20:44639404..44639426,+, p@chr20:44639498..44639509,+, p@chr20:44639584..44639604,+,…	0	0.43	0.00547731	0.03
p@chr19:11334017..11334033,- [rs4804154, rs4804155]			p@chr19:11334017..11334033,- [rs4804154, rs4804155]	rs4804154, rs4804155	chr19:11334017..11334033,-	p@chr19:11334017..11334033,-	0	0.43	0.00547731	0.03
		rs4804154:rs737337 D'=0.92; rsquared=0.66. p@chr19:11347228..11347241,- [rs737337]; rs4804155:rs737337 D'=0.92; rsquared=0.66. p@chr19:11347228..11347241,- [rs737337]	p@chr19:11347228..11347241,- [rs737337]	rs737337	chr19:11347228..11347241,-	p@chr19:11347228..11347241,-	0	0.35	0.0452269	0.17
p@chr19:52327915..52327926,+ [rs3752125]			p@chr19:52327915..52327926,+ [rs3752125]	rs10422101, rs763782, rs17695224, rs7252487, rs3752125	chr19:52327915..52327926,+	enhancer@chr19:52320046-52320281, p@chr19:52320046..52320049,-, enhancer@chr19:52324157-52325118, p@chr19:52324157..52324167,-, p@chr19:52324357..52324368,+, p@chr19:52324821..52324834,-, p@chr19:52325105..52325118,+, p@chr19:52327915..52327926,+	0	0.4	0.0140845	0.08
chr11:122526685..122526694,+ [rs7127978]			chr11:122526685..122526694,+ [rs7127978]	rs7127978	chr11:122526685..122526694,+	p3@UBASH3B, p1@UBASH3B, p9@UBASH3B, p5@UBASH3B, p6@UBASH3B, chr11:122526685..122526694,+, p8@UBASH3B, p2@UBASH3B	0	0.39	0.0164319	0.09
p@chr7:17287199..17287204,+ [rs6968554]			p@chr7:17287199..17287204,+ [rs6968554]	rs6968554	chr7:17287199..17287204,+	p@chr7:17287199..17287204,+, p@chr7:17287208..17287213,+, p@chr7:17287217..17287228,+, p@chr7:17287230..17287241,+, p@chr7:17287262..17287269,+	0	0.38	0.0206573	0.1
p@chr15:58576429..58576468,- [rs1711037]			p@chr15:58576429..58576468,- [rs1711037]	rs1711037	chr15:58576429..58576468,-	p@chr15:58576429..58576468,-	0	0.38	0.0211268	0.1
p@chr12:20473724..20473755,+ [rs7134375]			p@chr12:20473724..20473755,+ [rs7134375]	rs7134375	chr12:20473724..20473755,+	p@chr12:20473724..20473755,+	0	0.38	0.0220657	0.1
p@chr4:88057279..88057283,+ [rs1408]			p@chr4:88057279..88057283,+ [rs1408]	rs11097127, rs236984, rs236985, rs1408	chr4:88057279..88057283,+	p@chr4:87990444..87990448,+, enhancer@chr4:88008599-88008816, p@chr4:88057279..88057283,+	0	0.37	0.0316119	0.14
p5@INHBE [rs3809114]			p5@INHBE [rs3809114]	rs3809114	chr12:57848897..57848937,+	p5@INHBE	0	0.36	0.0336463	0.14
p3@LIPC [rs2070895]			p3@LIPC [rs2070895]	rs2070895	chr15:58724170..58724183,+	p3@LIPC, p2@LIPC	0	0.36	0.0359937	0.15
chr11:48066327..48066358,+ [rs7934659]			chr11:48066327..48066358,+ [rs7934659]	rs7946766, rs17198607, rs7934659	chr11:48066327..48066358,+	enhancer@chr11:48004294-48004631, enhancer@chr11:48028073-48028508, chr11:48066327..48066358,+	0	0.35	0.0449139	0.17
enhancer@chr15:58884938-58885321 [rs11637365]			enhancer@chr15:58884938-58885321 [rs11637365]	rs11637365	chr15:58884938-58885321	enhancer@chr15:58884938-58885321	0	0.34	0.0505477	0.18
p@chr19:8468345..8468362,+ [rs2230876]			p@chr19:8468345..8468362,+ [rs2230876]	rs2230876	chr19:8468345..8468362,+	p@chr19:8468345..8468362,+, chr19:8468459..8468502,+, p@chr19:8468613..8468632,+	0	0.33	0.0580595	0.2
p@chr2:211540478..211540490,+ [rs1047891]			p@chr2:211540478..211540490,+ [rs1047891]	rs1047891	chr2:211540478..211540490,+	p@chr2:211540478..211540490,+	0	0.33	0.0586854	0.2
p@chr16:68114139..68114174,+ [rs7188085]			p@chr16:68114139..68114174,+ [rs7188085]	rs7199443, rs7196789, rs20549, rs3785098, rs3785100, rs7204974, rs16957696, rs2285910, rs7188085, rs3743735, rs78537727	chr16:68114139..68114174,+	p2@TSNAXIP1, p1@PSKH1, p@chr16:67969524..67969643,-, p@chr16:67969649..67969718,-, p@chr16:67969838..67969863,+, enhancer@chr16:67993555-67993691, p8@SLC12A4, p1@DPEP2, p@chr16:68033515..68033528,+, enhancer@chr16:68039646-68040046, enhancer@chr16:68104327-68104520, enhancer@chr16:68113537-68113949, p@chr16:68113591..68113602,-, p@chr16:68114139..68114174,+, p4@NFATC3, p@chr16:68119821..68119868,…	0	0.32	0.0719875	0.23
p@chr6:32412666..32412686,+ [rs7194]			p@chr6:32412666..32412686,+ [rs7194]	rs7192, rs7194	chr6:32412666..32412686,+	p4@HLA-DRA, p1@CU687129, p@chr6:32412417..32412458,+, p@chr6:32412534..32412660,+, p@chr6:32412666..32412686,+, p@chr6:32412702..32412709,+, p@chr6:32412734..32412747,+	0	0.32	0.0726135	0.23
p@chr12:124433988..124434017,- [rs2178663]			p@chr12:124433988..124434017,- [rs2178663]	rs2178663	chr12:124433988..124434017,-	p@chr12:124433988..124434017,-	0	0.32	0.0744914	0.23
		rs2178663:rs9863 D'=1.0; rsquared=0.92. p@chr12:124421545..124421559,- [rs9863]	p@chr12:124421545..124421559,- [rs9863]	rs9863	chr12:124421545..124421559,-	p@chr12:124421545..124421559,-	0	0.1	0.609546	0.76
p7@ZDHHC18 [rs12760759]			p7@ZDHHC18 [rs12760759]	rs12760759	chr1:27158483..27158501,+	p7@ZDHHC18, p4@ZDHHC18, p8@ZDHHC18	0	0.3	0.0945227	0.28
		rs12760759:rs17162313 D'=1.0; rsquared=1.0. enhancer@chr1:27175784-27176273 [rs17162313]	enhancer@chr1:27175784-27176273 [rs17162313]	rs17162313	chr1:27175784-27176273	enhancer@chr1:27175784-27176273	0	0.19	0.31471	0.57
		rs12760759:rs1883660 D'=1.0; rsquared=0.59. enhancer@chr1:27191386-27191927 [rs1883660]	enhancer@chr1:27191386-27191927 [rs1883660]	rs1883660, rs11538549	chr1:27191386-27191927	enhancer@chr1:27191386-27191927, p1@NUDC, p2@NUDC	0	0.06	0.759311	0.84
p@chr11:126226533..126226546,- [rs73632737]			p@chr11:126226533..126226546,- [rs73632737]	rs73632737	chr11:126226533..126226546,-	p@chr11:126226533..126226546,-, p@chr11:126226587..126226599,-	0	0.3	0.0964006	0.28
chr15:63346713..63346752,+ [rs4468558]			chr15:63346713..63346752,+ [rs4468558]	rs4468558, rs4238372, rs4775614	chr15:63346713..63346752,+	chr15:63346713..63346752,+, p@chr15:63351752..63351785,+, p@chr15:63351782..63351815,-, chr15:63351808..63351853,+	0	0.29	0.105008	0.29
		rs4468558:rs7174174 D'=0.94; rsquared=0.83. chr15:63372403..63372411,- [rs7174174]	chr15:63372403..63372411,- [rs7174174]	rs7174174	chr15:63372403..63372411,-	chr15:63372403..63372411,-	0	0.19	0.322848	0.57
p14@FADS1 [rs174548, rs174549, rs174550]			p14@FADS1 [rs174548, rs174549, rs174550]	rs509360, rs174532, rs174538, rs174548, rs174549, rs174550, rs174561, rs2072114	chr11:61571172..61571181,-	chr11:61548480..61548492,+, p@chr11:61548732..61548749,-, p1@C11orf10, p1@FEN1, p14@FADS1, p7@FADS1, p@chr11:61582877..61582920,+, p@chr11:61605283..61605303,+	0	0.29	0.117527	0.31
p@chr16:56742451..56742454,- [rs4238789]			p@chr16:56742451..56742454,- [rs4238789]	rs4238789, rs4783958, rs11643731, rs8063870, rs955513, rs3764263, rs2217332, rs72786786, rs12448528, rs1991515, rs12928552, rs158481	chr16:56742451..56742454,-	enhancer@chr16:56742451-56742889, p@chr16:56742451..56742454,-, p8@AB385278, p3@AB385278, p7@AB385278, p2@NUP93, p4@NUP93, p@chr16:56886554..56886556,+, enhancer@chr16:56945707-56946108, p4@HERPUD1, p@chr16:56969284..56969295,+, enhancer@chr16:56985400-56985562, enhancer@chr16:57034523-57034824, enhancer@chr16:57048506-57048777, p7@NLRC5	0	0.27	0.138185	0.36
p4@NISCH [rs4687618]			p4@NISCH [rs4687618]	rs1011064, rs4687618, rs758800, rs13326165	chr3:52514172..52514193,+	p25@NISCH, p4@NISCH, p@chr3:52529298..52529302,-, p1@STAB1, p2@STAB1, p3@STAB1, enhancer@chr3:52531917-52532418	0	0.27	0.143192	0.36
		rs4687618:rs887515 D'=1.0; rsquared=0.25. p33@NISCH [rs887515]	p33@NISCH [rs887515]	rs887515	chr3:52523693..52523697,+	p33@NISCH	0	0.1	0.613772	0.76
p3@TGOLN2 [rs10460587]			p3@TGOLN2 [rs10460587]	rs1061782, rs1554110, rs17026212, rs2366404, rs10460585, rs10460587	chr2:85555385..85555424,-	p10@TGOLN2, p1@AK025805, p@chr2:85551750..85551752,-, p2@TGOLN2, p1@TGOLN2, p@chr2:85555169..85555184,+, p4@TGOLN2, p3@TGOLN2	0	0.26	0.16651	0.4
enhancer@chr6:30796195-30796565 [rs1264350]			enhancer@chr6:30796195-30796565 [rs1264350]	rs1264350	chr6:30796195-30796565	enhancer@chr6:30796195-30796565	0	0.25	0.169797	0.4
p@chr19:54775040..54775082,- [rs419304]			p@chr19:54775040..54775082,- [rs419304]	rs419304, rs1645781	chr19:54775040..54775082,-	p@chr19:54775040..54775082,-, enhancer@chr19:54828104-54828567, p@chr19:54828407..54828412,+	0	0.25	0.17543	0.4
p@chr17:76377571..76377602,- [rs4082919]			p@chr17:76377571..76377602,- [rs4082919]	rs4082919, rs4366775	chr17:76377571..76377602,-	enhancer@chr17:76377337-76378350, p@chr17:76377496..76377519,-, p@chr17:76377547..76377554,-, p@chr17:76377571..76377602,-, enhancer@chr17:76382008-76383398, p@chr17:76382279..76382292,+	0	0.25	0.188732	0.42
p@chr16:68299481..68299485,- [rs12596500]			p@chr16:68299481..68299485,- [rs12596500]	rs12596500	chr16:68299481..68299485,-	p@chr16:68299481..68299485,-	0	0.24	0.193271	0.42
		rs12596500:rs12447119 D'=1.0; rsquared=0.87. p5@SLC7A6 [rs12447119]	p5@SLC7A6 [rs12447119]	rs12447119, rs9933029	chr16:68298202..68298215,+	p3@SLC7A6, p5@SLC7A6, enhancer@chr16:68303268-68303682	0	0.18	0.349765	0.57
		rs12596500:rs7184821 D'=1.0; rsquared=0.5. p2@ESRP2 [rs7184821]	p2@ESRP2 [rs7184821]	rs7184821	chr16:68270072..68270086,-	p1@ESRP2, p2@ESRP2, p6@ESRP2, p4@ESRP2, chr16:68270218..68270248,+	0	0.17	0.380438	0.57
p@chr16:67581701..67581719,- [rs13334205]			p@chr16:67581701..67581719,- [rs13334205]	rs13334205	chr16:67581701..67581719,-	enhancer@chr16:67581625-67581971, p@chr16:67581701..67581719,-, p@chr16:67581738..67581747,-	0	0.24	0.198592	0.42
chr10:5799591..5799598,+ [rs2275774]			chr10:5799591..5799598,+ [rs2275774]	rs2275774	chr10:5799591..5799598,+	chr10:5799591..5799598,+	0	0.24	0.203756	0.42
p@chr19:45242420..45242462,+ [rs1531517]			p@chr19:45242420..45242462,+ [rs1531517]	rs1531517	chr19:45242420..45242462,+	enhancer@chr19:45242034-45242469, p@chr19:45242084..45242119,-, p@chr19:45242401..45242412,+, p@chr19:45242420..45242462,+	0	0.24	0.205321	0.42
p@chr4:103212519..103212530,- [rs233807]			p@chr4:103212519..103212530,- [rs233807]	rs233807	chr4:103212519..103212530,-	p@chr4:103212519..103212530,-	0	0.24	0.211268	0.43
enhancer@chr1:230289705-230290142 [rs7551742]			enhancer@chr1:230289705-230290142 [rs7551742]	rs7551742	chr1:230289705-230290142	enhancer@chr1:230289705-230290142	0	0.23	0.232707	0.46
		rs7551742:rs4846905 D'=0.93; rsquared=0.83. enhancer@chr1:230279464-230279771 [rs4846905]	enhancer@chr1:230279464-230279771 [rs4846905]	rs4846905	chr1:230279464-230279771	enhancer@chr1:230279464-230279771	0	0.18	0.361502	0.57
p@chr17:37970009..37970013,- [rs9909593]			p@chr17:37970009..37970013,- [rs9909593]	rs1495099, rs113612868, rs1053651, rs3764351, rs876493, rs2941505, rs9303274, rs907091, rs907092, rs9909593, rs12936231, rs12603332	chr17:37970009..37970013,-	p9@PPP1R1B, p4@PPP1R1B, p1@TCAP, p@chr17:37822165..37822185,-, p@chr17:37822260..37822273,+, p@chr17:37822314..37822323,+, p@chr17:37822397..37822419,+, p@chr17:37822426..37822439,+, p@chr17:37822456..37822461,+, p@chr17:37822481..37822514,+, p@chr17:37822552..37822559,+, p@chr17:37822572..37822583,+, p@chr17:37822585..37822591,+, p1@PNMT, p11@PNMT, p6@PNMT, p15@PNMT, p2@PNMT, enhancer@chr17:3783…	0	0.22	0.237089	0.46
p@chr4:157683775..157683778,- [rs1425486]			p@chr4:157683775..157683778,- [rs1425486]	rs1425486	chr4:157683775..157683778,-	p@chr4:157683775..157683778,-	0	0.2	0.290767	0.55
p@chr11:45880009..45880015,+ [rs1401417]			p@chr11:45880009..45880015,+ [rs1401417]	rs1401417	chr11:45880009..45880015,+	p@chr11:45880009..45880015,+	0	0.2	0.308138	0.57
p@chr10:46076251..46076291,- [rs7086046]			p@chr10:46076251..46076291,- [rs7086046]	rs7086046	chr10:46076251..46076291,-	p@chr10:46076251..46076291,-, p@chr10:46076299..46076317,-	0	0.19	0.321127	0.57
p@chr9:15298766..15298791,+ [rs675849]			p@chr9:15298766..15298791,+ [rs675849]	rs675849	chr9:15298766..15298791,+	p@chr9:15298766..15298791,+	0	0.18	0.341628	0.57
p2@CU690121 [rs12225230]			p2@CU690121 [rs12225230]	rs12225230	chr11:116728907..116728948,+	p2@CU690121	0	0.18	0.357433	0.57
p1@ENST00000438127 [rs3181]			p1@ENST00000438127 [rs3181]	rs3181	chr11:116906800..116906803,-	p1@ENST00000438127	0	0.18	0.358216	0.57
		rs3181:rs10892074 D'=1.0; rsquared=0.17. p@chr11:116980715..116980720,- [rs10892074]	p@chr11:116980715..116980720,- [rs10892074]	rs10892074	chr11:116980715..116980720,-	p@chr11:116980715..116980720,-	0	0.14	0.457277	0.64
		rs3181:rs7930264 D'=1.0; rsquared=0.89. enhancer@chr11:116870646-116870996 [rs7930264]	enhancer@chr11:116870646-116870996 [rs7930264]	rs7930264	chr11:116870646-116870996	enhancer@chr11:116870646-116870996	0	0.07	0.738967	0.83
enhancer@chr6:34663389-34663600 [rs3800457, rs3800458]			enhancer@chr6:34663389-34663600 [rs3800457, rs3800458]	rs3800457, rs3800458	chr6:34663389-34663600	enhancer@chr6:34663389-34663600	0	0.17	0.37011	0.57
		rs3800457:rs11757370 D'=1.0; rsquared=0.3. enhancer@chr6:34760607-34760986 [rs11757370, rs11755420]; rs3800457:rs11755420 D'=1.0; rsquared=0.3. enhancer@chr6:34760607-34760986 [rs11757370, rs11755420]; rs3800458:rs11757370 D'=1.0; rsquared=0.89. enhancer@chr6:34760607-34760986 [rs11757370, rs11755420]; rs3800458:rs11755420 D'=1.0; rsquared=0.89. enhancer@chr6:34760607-34760986 [rs11757370, rs1175…	enhancer@chr6:34760607-34760986 [rs11757370, rs11755420]	rs11757370, rs11755420	chr6:34760607-34760986	enhancer@chr6:34760607-34760986	0	0.15	0.428326	0.62
		rs3800457:rs2764205 D'=1.0; rsquared=0.96. p1@ENST00000408001 [rs2764205]; rs3800458:rs2764205 D'=1.0; rsquared=0.28. p1@ENST00000408001 [rs2764205]	p1@ENST00000408001 [rs2764205]	rs2764205	chr6:34711914..34711921,+	p1@ENST00000408001	0	0.07	0.740845	0.83
p5@BAZ1B [rs1178979]			p5@BAZ1B [rs1178979]	rs1178979	chr7:72856463..72856467,-	p5@BAZ1B	0	0.17	0.371049	0.57
p@chr8:126447258..126447275,+ [rs2385114]			p@chr8:126447258..126447275,+ [rs2385114]	rs2385114	chr8:126447258..126447275,+	enhancer@chr8:126446642-126447323, p@chr8:126447258..126447275,+	0	0.17	0.373552	0.57
p@chr1:93627656..93627659,- [rs4847235]			p@chr1:93627656..93627659,- [rs4847235]	rs4847235, rs1335679, rs12030549	chr1:93627656..93627659,-	p@chr1:93627656..93627659,-, p4@CCDC18, enhancer@chr1:93669062-93669462	0	0.17	0.374648	0.57
enhancer@chr10:65274637-65275000 [rs10761779]			enhancer@chr10:65274637-65275000 [rs10761779]	rs10761779	chr10:65274637-65275000	enhancer@chr10:65274637-65275000	0	0.16	0.402191	0.59
p2@APOM [rs3117583]			p2@APOM [rs3117583]	rs3117583	chr6:31619827..31619857,+	p2@APOM	0	0.16	0.40579	0.59
		rs3117583:rs3130618 D'=1.0; rsquared=1.0. p6@GPANK1 [rs3130618]	p6@GPANK1 [rs3130618]	rs3130618	chr6:31631881..31631910,-	p6@GPANK1	0	0.13	0.502191	0.68
		rs3117583:rs3115663 D'=1.0; rsquared=1.0. p5@PRRC2A [rs3115663]	p5@PRRC2A [rs3115663]	rs3115663	chr6:31601765..31601770,+	p5@PRRC2A	0	0.02	0.928326	0.95
p@chr20:33356385..33356390,- [rs2295353]			p@chr20:33356385..33356390,- [rs2295353]	rs2295353	chr20:33356385..33356390,-	p@chr20:33356385..33356390,-	0	0.15	0.437246	0.62
p@chr11:117075245..117075293,- [rs508487]			p@chr11:117075245..117075293,- [rs508487]	rs508487	chr11:117075245..117075293,-	p@chr11:117075245..117075293,-	0	0.14	0.478873	0.66
p@chr11:46934513..46934519,+ [rs79920646, rs7120113]			p@chr11:46934513..46934519,+ [rs79920646, rs7120113]	rs79920646, rs7120113, rs17787930	chr11:46934513..46934519,+	p@chr11:46934513..46934519,+, p1@C11orf49, p2@C11orf49	0	0.13	0.508294	0.68
p@chr6:139843931..139843972,+ [rs4896469]			p@chr6:139843931..139843972,+ [rs4896469]	rs4896469	chr6:139843931..139843972,+	p@chr6:139843931..139843972,+	0	0.13	0.526604	0.7
p4@TMEM110 [rs11720228]			p4@TMEM110 [rs11720228]	rs11720228	chr3:52877178..52877189,-	p4@TMEM110	0	0.12	0.547731	0.72
enhancer@chr15:58712788-58712944 [rs11854624]			enhancer@chr15:58712788-58712944 [rs11854624]	rs11854624	chr15:58712788-58712944	enhancer@chr15:58712788-58712944	0	0.1	0.613928	0.76
		rs11854624:rs17821310 D'=1.0; rsquared=0.86. p1@LIPC [rs17821310]	p1@LIPC [rs17821310]	rs17821310	chr15:58702742..58702777,+	p1@LIPC	0	0.1	0.638967	0.77
p@chr10:65121474..65121480,- [rs12355784]			p@chr10:65121474..65121480,- [rs12355784]	rs12355784	chr10:65121474..65121480,-	p@chr10:65121474..65121480,-	0	0.09	0.660563	0.78
enhancer@chr12:123387713-123388070 [rs10847980]			enhancer@chr12:123387713-123388070 [rs10847980]	rs10847980	chr12:123387713-123388070	enhancer@chr12:123387713-123388070	0	0.08	0.682629	0.79
p6@PSORS1C1 [rs1265099]			p6@PSORS1C1 [rs1265099]	rs1265099	chr6:31105427..31105438,+	p6@PSORS1C1	0	0.08	0.705947	0.81
		same SNP, different promoter: chr6:31105474..31105493,+ [rs1265099]	chr6:31105474..31105493,+ [rs1265099]	rs1265099	chr6:31105474..31105493,+	chr6:31105474..31105493,+	0	0.01	0.967606	0.98
enhancer@chr6:127481688-127482073 [rs9491700]			enhancer@chr6:127481688-127482073 [rs9491700]	rs9491700	chr6:127481688-127482073	enhancer@chr6:127481688-127482073	0	0.06	0.764789	0.84
enhancer@chr2:227172292-227172683 [rs2713556]			enhancer@chr2:227172292-227172683 [rs2713556]	rs2713556	chr2:227172292-227172683	enhancer@chr2:227172292-227172683	0	0.06	0.777152	0.84
p7@RBM6 [rs6772095]			p7@RBM6 [rs6772095]	rs6772095	chr3:49978342..49978346,+	p7@RBM6	0	0.05	0.806416	0.86
enhancer@chr1:39736190-39736575 [rs4660603]			enhancer@chr1:39736190-39736575 [rs4660603]	rs4660603	chr1:39736190-39736575	enhancer@chr1:39736190-39736575	0	0.05	0.812989	0.86
p5@NOL3 [rs2233455]			p5@NOL3 [rs2233455]	rs2233455	chr16:67207821..67207836,+	p5@NOL3, p2@NOL3, p4@NOL3	0	0.03	0.891549	0.93
p@chr17:37405559..37405561,- [rs2061342]			p@chr17:37405559..37405561,- [rs2061342]	rs2061342	chr17:37405559..37405561,-	p@chr17:37405559..37405561,-	0	0.03	0.893897	0.93
p@chr16:19871741..19871755,- [rs11865578]			p@chr16:19871741..19871755,- [rs11865578]	rs11865578	chr16:19871741..19871755,-	p@chr16:19871670..19871687,-, p@chr16:19871741..19871755,-	0	0.03	0.906886	0.93
p3@PACSIN1 [rs11758326]			p3@PACSIN1 [rs11758326]	rs11758326	chr6:34482603..34482614,+	p3@PACSIN1, p2@PACSIN1	0	0	1	1
Diastolic blood pressure
Top promoter[SNPs in top promoter]		Linkage	Top promoter[SNPs in top promoter]	promoter snps in region	chosen promoter id	promoters	original p	Corrected coexpression score	raw p(perm)	FDR
p@chr11:16916978..16916996,- [rs11024074]			p@chr11:16916978..16916996,- [rs11024074]	rs11024074	chr11:16916978..16916996,-	p@chr11:16916978..16916996,-	0	0.58	0.0206061	0.29
enhancer@chr7:107939769-107940082 [rs11561991]			enhancer@chr7:107939769-107940082 [rs11561991]	rs11561991	chr7:107939769-107940082	enhancer@chr7:107939769-107940082	0	0.49	0.0424242	0.3
p@chr3:27490147..27490174,+ [rs13096477]			p@chr3:27490147..27490174,+ [rs13096477]	rs13096477, rs7644466	chr3:27490147..27490174,+	p@chr3:27490147..27490174,+, p@chr3:27515194..27515196,-	0	0.43	0.0690909	0.32
p4@SH2B3 [rs739496]			p4@SH2B3 [rs739496]	rs739496	chr12:111887748..111887752,+	p4@SH2B3	0	0.36	0.123636	0.37
p@chr10:63524522..63524527,- [rs1530440]			p@chr10:63524522..63524527,- [rs1530440]	rs1530440	chr10:63524522..63524527,-	p@chr10:63524374..63524382,-, p@chr10:63524394..63524413,-, p@chr10:63524414..63524429,-, p@chr10:63524522..63524527,-	0	0.32	0.155152	0.37
p@chr6:26104437..26104461,- [rs198851]			p@chr6:26104437..26104461,- [rs198851]	rs198851	chr6:26104437..26104461,-	p@chr6:26104437..26104461,-	0	0.31	0.158788	0.37
p@chr12:90090838..90090842,- [rs12230074, rs11105378]			p@chr12:90090838..90090842,- [rs12230074, rs11105378]	rs12230074, rs11105378	chr12:90090838..90090842,-	p@chr12:90090838..90090842,-	0	0.22	0.276364	0.52
p11@MTHFR [rs13306561]			p11@MTHFR [rs13306561]	rs13306561	chr1:11865532..11865537,-	p11@MTHFR	0	0.21	0.29697	0.52
p@chr4:81208116..81208130,+ [rs3733336]			p@chr4:81208116..81208130,+ [rs3733336]	rs3733336	chr4:81208116..81208130,+	p@chr4:81208116..81208130,+	0	0.14	0.415758	0.65
p@chr12:112212004..112212016,+ [rs2238151]			p@chr12:112212004..112212016,+ [rs2238151]	rs886205, rs2238151	chr12:112212004..112212016,+	p1@ALDH2, p@chr12:112211973..112211988,+, p@chr12:112212004..112212016,+	0	0.1	0.518788	0.72
p3@NT5C2 [rs11191582]			p3@NT5C2 [rs11191582]	rs11191580, rs11191582	chr10:104913367..104913393,-	p@chr10:104905924..104905930,-, p@chr10:104905957..104905982,-, p5@NT5C2, p3@NT5C2	0	0.08	0.566061	0.72
p8@ATXN2 [rs695871]			p8@ATXN2 [rs695871]	rs695871	chr12:112036874..112036883,-	p8@ATXN2, p6@ATXN2, p1@ATXN2	0	0.03	0.730909	0.85
p14@CSK [rs2168519, rs8033381]			p14@CSK [rs2168519, rs8033381]	rs1378942, rs2168519, rs8033381	chr15:75080883..75080890,+	enhancer@chr15:75077206-75078007, p14@CSK	0	0.02	0.791515	0.85
enhancer@chr11:16357706-16357868 [rs12798854]			enhancer@chr11:16357706-16357868 [rs12798854]	rs12798854	chr11:16357706-16357868	enhancer@chr11:16357706-16357868	0	0	1	1
Systolic blood pressure
Top promoter[SNPs in top promoter]		Linkage	Top promoter[SNPs in top promoter]	promoter snps in region	chosen promoter id	promoters	original p	Corrected coexpression score	raw p(perm)	FDR
p@chr1:11905830..11905839,- [rs5068]			p@chr1:11905830..11905839,- [rs5068]	rs13306561, rs5068	chr1:11905830..11905839,-	p11@MTHFR, p@chr1:11905799..11905806,-, p@chr1:11905830..11905839,-, p@chr1:11905915..11905921,-, p@chr1:11906020..11906041,+, p@chr1:11906044..11906050,-	0	0.54	0.00846024	0.09
enhancer@chr11:10350347-10350728 [rs7129220]			enhancer@chr11:10350347-10350728 [rs7129220]	rs7129220	chr11:10350347-10350728	enhancer@chr11:10350347-10350728	0	0.46	0.0186125	0.09
p@chr11:16916978..16916996,- [rs11024074]			p@chr11:16916978..16916996,- [rs11024074]	rs11024074	chr11:16916978..16916996,-	p@chr11:16916978..16916996,-	0	0.44	0.0203046	0.09
p@chr5:32829061..32829092,+ [rs7733331]			p@chr5:32829061..32829092,+ [rs7733331]	rs7733331	chr5:32829061..32829092,+	p@chr5:32829061..32829092,+	0	0.37	0.0592217	0.19
p@chr10:75409754..75409787,- [rs9664184, rs12247028]			p@chr10:75409754..75409787,- [rs9664184, rs12247028]	rs9664184, rs12247028	chr10:75409754..75409787,-	p@chr10:75409754..75409787,-	0	0.27	0.130288	0.34
p14@CSK [rs2168519, rs8033381]			p14@CSK [rs2168519, rs8033381]	rs1378942, rs2168519, rs8033381	chr15:75080883..75080890,+	enhancer@chr15:75077206-75078007, p14@CSK	0	0.18	0.235195	0.48
p@chr10:104905957..104905982,- [rs11191580]			p@chr10:104905957..104905982,- [rs11191580]	rs11191580, rs11191582	chr10:104905957..104905982,-	p@chr10:104905924..104905930,-, p@chr10:104905957..104905982,-, p5@NT5C2, p3@NT5C2	0	0.17	0.260575	0.48
enhancer@chr20:57740587-57741260 [rs6026742]			enhancer@chr20:57740587-57741260 [rs6026742]	rs6026742	chr20:57740587-57741260	enhancer@chr20:57740587-57741260	0	0.12	0.348562	0.57
p@chr10:104591351..104591362,+ [rs17115100]			p@chr10:104591351..104591362,+ [rs17115100]	rs17115100, rs3824754	chr10:104591351..104591362,+	p@chr10:104591230..104591263,-, p@chr10:104591351..104591362,+, p@chr10:104614236..104614277,-	0	0.09	0.450085	0.65
p@chr17:43195790..43195798,- [rs3744760]			p@chr17:43195790..43195798,- [rs3744760]	rs3744760	chr17:43195790..43195798,-	p@chr17:43195790..43195798,-	0	0.06	0.531303	0.69
p@chr12:90090838..90090842,- [rs11105378, rs12230074]			p@chr12:90090838..90090842,- [rs11105378, rs12230074]	rs11105378, rs12230074	chr12:90090838..90090842,-	p@chr12:90090838..90090842,-	0	0.02	0.724196	0.79
p5@FURIN [rs4932178]			p5@FURIN [rs4932178]	rs4932178	chr15:91411874..91411885,+	p1@FURIN, p5@FURIN	0	0.02	0.732657	0.79
enhancer@chr10:104769429-104769711 [rs11191511]			enhancer@chr10:104769429-104769711 [rs11191511]	rs11191511	chr10:104769429-104769711	enhancer@chr10:104769429-104769711	0	0	1	1
LDL cholesterol
Top promoter[SNPs in top promoter]		Linkage	Top promoter[SNPs in top promoter]	promoter snps in region	chosen promoter id	promoters	original p	Corrected coexpression score	raw p(perm)	FDR
p94@APOB [rs1801701]			p94@APOB [rs1801701]	rs1042034, rs1801702, rs1042031, rs1801701, rs676210, rs6413458, rs693, rs533617, rs1801699, rs673548, rs12713843, rs1800478, rs1367117, rs12714264, rs1800481, rs9282606, rs7567653, rs79428416	chr2:21228923..21228930,-	p@chr2:21224999..21225013,-, p@chr2:21225044..21225056,-, p44@APOB, p60@APOB, p3@APOB, p19@APOB, p9@APOB, p23@APOB, p47@APOB, p40@APOB, p30@APOB, p28@APOB, p4@APOB, p94@APOB, p67@APOB, p84@APOB, p35@APOB, p32@APOB, p15@APOB, p75@APOB, p20@APOB, p13@APOB, p5@APOB, p7@APOB, p2@BC172787, p5@BC172787, p1@BC172787, p3@BC172787, p13@BC172787, p4@BC172787, p6@BC172787, p57@APOB, p39@APOB, p29@APOB, p58@…	0	0.77	0	0
p@chr17:64210704..64210723,+ [rs1801689]			p@chr17:64210704..64210723,+ [rs1801689]	rs1801689	chr17:64210704..64210723,+	p@chr17:64210610..64210619,-, p@chr17:64210704..64210723,+	0	0.73	0	0
p3@ABCG5 [rs11887534]			p3@ABCG5 [rs11887534]	rs10208987, rs6756629, rs11887534	chr2:44065946..44065958,-	p@chr2:44043042..44043044,-, p@chr2:44065065..44065102,-, p3@ABCG5, p2@ABCG5	0	0.66	0	0
		rs11887534:rs13395550 D'=0.25; rsquared=0.06. enhancer@chr2:44007303-44007575 [rs13395550]	enhancer@chr2:44007303-44007575 [rs13395550]	rs13395550	chr2:44007303-44007575	enhancer@chr2:44007303-44007575	0	0.06	0.767169	0.87
p2@ENST00000518619 [rs9987289, rs4841132]			p2@ENST00000518619 [rs9987289, rs4841132]	rs9987289, rs4841132	chr8:9183625..9183635,+	p1@ENST00000518619, p2@ENST00000518619	0	0.64	0	0
		rs9987289:rs7357361 D'=1.0; rsquared=0.57. enhancer@chr8:9219931-9220273 [rs7357361]; rs4841132:rs7357361 D'=1.0; rsquared=0.57. enhancer@chr8:9219931-9220273 [rs7357361]	enhancer@chr8:9219931-9220273 [rs7357361]	rs7357361	chr8:9219931-9220273	enhancer@chr8:9219931-9220273	0	0.21	0.23632	0.46
p2@ASCC2 [rs4823054]			p2@ASCC2 [rs4823054]	rs4823054	chr22:30198075..30198098,-	p2@ASCC2	0	0.57	0	0
p1@APOA5 [rs651821]			p1@APOA5 [rs651821]	rs651821	chr11:116662593..116662620,-	p1@APOA5	0	0.55	0	0
p6@HNF1A-AS1 [rs1169286]			p6@HNF1A-AS1 [rs1169286]	rs1169286	chr12:121418749..121418758,-	p6@HNF1A-AS1, p3@HNF1A-AS1	0	0.54	0	0
		rs1169286:rs2258287 D'=0.68; rsquared=0.39. p1@C12orf43 [rs2258287]	p1@C12orf43 [rs2258287]	rs2258287	chr12:121454282..121454304,-	p1@C12orf43	0	0.18	0.324642	0.55
p@chr19:19616795..19616800,+ [rs1063966]			p@chr19:19616795..19616800,+ [rs1063966]	rs1063966	chr19:19616795..19616800,+	p@chr19:19616795..19616800,+	0	0.53	0	0
		rs1063966:rs4808967 D'=1.0; rsquared=1.0. p@chr19:19640454..19640461,+ [rs4808967]	p@chr19:19640454..19640461,+ [rs4808967]	rs4808967	chr19:19640454..19640461,+	p@chr19:19640431..19640450,+, p@chr19:19640454..19640461,+	0	0.24	0.169299	0.36
p2@LPIN3 [rs6029636]			p2@LPIN3 [rs6029636]	rs6029636	chr20:39969519..39969596,+	p1@LPIN3, p2@LPIN3	0	0.53	0.000183621	0
p@chr16:72075048..72075055,- [rs9932951]			p@chr16:72075048..72075055,- [rs9932951]	rs4788600, rs3764310, rs9932951, rs2000999	chr16:72075048..72075055,-	p@chr16:72047835..72047846,-, p@chr16:72048279..72048295,+, p@chr16:72048310..72048324,+, p@chr16:72048344..72048355,+, p@chr16:72048389..72048422,+, p@chr16:72075048..72075055,-, p@chr16:72108070..72108089,+, p@chr16:72108093..72108100,+, p@chr16:72108103..72108121,+	0	0.52	0.000183621	0
		rs9932951:rs3213422 D'=0.29; rsquared=0.08. p1@DHODH [rs34270657, rs3213422]	p1@DHODH [rs34270657, rs3213422]	rs34270657, rs3213422	chr16:72042636..72042660,+	p1@DHODH	0	0.43	0.00569225	0.03
p2@NPC1L1 [rs41279633, rs17655652]			p2@NPC1L1 [rs41279633, rs17655652]	rs41279633, rs17655652	chr7:44580918..44580934,-	p1@NPC1L1, p2@NPC1L1, p@chr7:44581054..44581057,+	0	0.51	0.000183621	0
		rs17655652:rs732797 D'=0.92; rsquared=0.4. p@chr7:44646674..44646689,+ [rs732797]	p@chr7:44646674..44646689,+ [rs732797]	rs732797, rs1434961, rs1295021	chr7:44646674..44646689,+	p@chr7:44646674..44646689,+, enhancer@chr7:44657226-44657498, p@chr7:44657448..44657459,+, p@chr7:44661060..44661101,-	0	0.17	0.363753	0.57
p@chr1:109727753..109727759,+ [rs12239854]			p@chr1:109727753..109727759,+ [rs12239854]	rs12239854, rs688386, rs12746961, rs653635, rs1337248, rs6698843, rs464218, rs2228604, rs11581665, rs3768494, rs3768493, rs10858091, rs4970764, rs552101	chr1:109727753..109727759,+	p@chr1:109727753..109727759,+, p@chr1:109784420..109784424,+, enhancer@chr1:109800134-109800539, p8@CELSR2, p4@CELSR2, p2@CELSR2, p10@CELSR2, p@chr1:109856077..109856090,-, p@chr1:109856117..109856176,-, p@chr1:109856200..109856211,-, p@chr1:109884725..109884745,-, p@chr1:109910094..109910108,-, p@chr1:109935515..109935518,-, p1@SYPL2, p3@SYPL2, p2@SYPL2, p1@GPR61, p2@GPR61	0	0.49	0.000550863	0
p1@SPC24 [rs892114, rs7251031]			p1@SPC24 [rs892114, rs7251031]	rs3786721, rs6511720, rs8102912, rs17248748, rs1010679, rs2738456, rs892114, rs7251031	chr19:11266449..11266467,-	p@chr19:11146457..11146463,-, enhancer@chr19:11202212-11202837, p@chr19:11202456..11202473,+, enhancer@chr19:11205696-11206011, p@chr19:11205723..11205737,-, p@chr19:11205793..11205800,-, enhancer@chr19:11206953-11207150, p@chr19:11207131..11207150,+, p@chr19:11237072..11237076,+, p1@SPC24, p2@SPC24	0	0.47	0.00183621	0.01
p1@FRK [rs1999929]			p1@FRK [rs1999929]	rs1999929	chr6:116381918..116381977,-	p1@FRK, p3@FRK, p2@FRK	0	0.45	0.00330518	0.02
p3@SLC22A1 [rs12208357]			p3@SLC22A1 [rs12208357]	rs12208357	chr6:160543369..160543379,+	p3@SLC22A1	0	0.43	0.0069776	0.04
p4@HMGCR [rs3761740]			p4@HMGCR [rs3761740]	rs3761740	chr5:74632334..74632364,+	p4@HMGCR	0	0.42	0.00863019	0.05
p12@TRIB1 [rs17405319]			p12@TRIB1 [rs17405319]	rs2385114, rs17405319	chr8:126449613..126449621,+	enhancer@chr8:126446642-126447323, p@chr8:126447258..126447275,+, p12@TRIB1	0	0.42	0.00881381	0.05
p1@FEN1 [rs174538, rs412334]			p1@FEN1 [rs174538, rs412334]	rs2269928, rs149803, rs174532, rs174538, rs412334, rs174548, rs174549, rs174550, rs174561, rs968567, rs2072114	chr11:61560348..61560419,+	p@chr11:61537818..61537845,+, chr11:61538963..61538976,+, p@chr11:61538994..61539023,+, p@chr11:61539002..61539027,-, p@chr11:61548732..61548749,-, p1@C11orf10, p1@FEN1, p14@FADS1, p7@FADS1, p@chr11:61582877..61582920,+, p6@FADS2, p3@FADS2, p1@FADS2, p@chr11:61605283..61605303,+	0	0.41	0.00973191	0.05
		rs174538:rs412334 D'=1.0; rsquared=0.07. p4@C11orf10 [rs412334]; same SNP, different promoter: p4@C11orf10 [rs412334]	p4@C11orf10 [rs412334]	rs412334	chr11:61560254..61560264,-	p4@C11orf10	0	0.12	0.520933	0.72
p5@ABCA1 [rs1800978]			p5@ABCA1 [rs1800978]	rs1800978	chr9:107665982..107665994,-	p5@ABCA1, p7@ABCA1	0	0.39	0.0141388	0.07
p3@TIRAP [rs10893493]			p3@TIRAP [rs10893493]	rs10893493, rs646775, rs73632737	chr11:126152941..126152949,+	p3@TIRAP, p1@AK304703, p2@AK304703, p@chr11:126226533..126226546,-, p@chr11:126226587..126226599,-	0	0.37	0.0220345	0.1
		rs10893493:rs638433 D'=0.96; rsquared=0.92. enhancer@chr11:126180283-126180636 [rs638433]	enhancer@chr11:126180283-126180636 [rs638433]	rs638433	chr11:126180283-126180636	enhancer@chr11:126180283-126180636	0	0.19	0.30022	0.53
p@chr1:63112277..63112278,+ [rs1168085]			p@chr1:63112277..63112278,+ [rs1168085]	rs1168085	chr1:63112277..63112278,+	p@chr1:63112277..63112278,+	0	0.37	0.0229526	0.1
p@chr2:121310959..121310964,- [rs940688]			p@chr2:121310959..121310964,- [rs940688]	rs940688	chr2:121310959..121310964,-	p@chr2:121310959..121310964,-	0	0.36	0.0269923	0.11
p7@PCSK9 [rs11591147, rs11583680]			p7@PCSK9 [rs11591147, rs11583680]	rs11591147, rs11583680	chr1:55505693..55505698,+	p7@PCSK9	0	0.35	0.0326845	0.12
p3@HAVCR1 [rs67960962]			p3@HAVCR1 [rs67960962]	rs67960962	chr5:156485016..156485034,-	p3@HAVCR1	0	0.35	0.0337863	0.12
		rs67960962:rs6882076 D'=0.83; rsquared=0.31. p1@TIMD4 [rs6882076]	p1@TIMD4 [rs6882076]	rs6882076	chr5:156390230..156390246,-	p1@TIMD4	0	0.07	0.730812	0.87
p@chr9:136154265..136154271,- [rs579459, rs649129]			p@chr9:136154265..136154271,- [rs579459, rs649129]	rs13295207, rs10901252, rs579459, rs649129, rs56343119	chr9:136154265..136154271,-	enhancer@chr9:136075454-136075720, p2@AK095379, p1@AK095379, p@chr9:136154265..136154271,-, p@chr9:136237734..136237750,-, p@chr9:136237940..136237954,+	0	0.34	0.0394785	0.14
chr19:19488822..19488846,+ [rs12973258]			chr19:19488822..19488846,+ [rs12973258]	rs67215661, rs12460764, rs59148799, rs12973258, rs17288409, rs7250658, rs73004933	chr19:19488822..19488846,+	p1@SUGP1, p1@MAU2, p@chr19:19431888..19431912,-, enhancer@chr19:19483893-19484092, enhancer@chr19:19488658-19488936, chr19:19488822..19488846,+, enhancer@chr19:19504149-19504345, p1@LOC100128429, p@chr19:19675738..19675742,-	0	0.33	0.0468234	0.16
chr6:160770176..160770186,- [rs539298]			chr6:160770176..160770186,- [rs539298]	rs539298, rs3105749	chr6:160770176..160770186,-	chr6:160770176..160770186,-, p@chr6:160821141..160821145,+	0	0.33	0.0488432	0.16
p4@TAP2 [rs241448, rs241447, rs241452]			p4@TAP2 [rs241448, rs241447, rs241452]	rs2857106, rs241448, rs241447, rs241452	chr6:32796444..32796464,-	enhancer@chr6:32787339-32787575, p4@TAP2	0	0.33	0.0532501	0.17
p@chr19:45411878..45411884,- [rs7412]			p@chr19:45411878..45411884,- [rs7412]	rs395908, rs405509, rs7412, rs12721109, rs5158, rs2288911, rs2288912	chr19:45411878..45411884,-	enhancer@chr19:45373382-45373614, p1@APOE, p@chr19:45411878..45411884,-, p@chr19:45412009..45412026,+, p3@AJ249921, enhancer@chr19:45447166-45447474, p3@APOC2, p2@APOC2, p1@APOC2	0	0.31	0.0650018	0.2
p3@C6orf10 [rs6913309]			p3@C6orf10 [rs6913309]	rs6913309	chr6:32339657..32339660,-	p3@C6orf10, p1@C6orf10, p2@C6orf10	0	0.31	0.0701432	0.21
		rs6913309:rs13218331 D'=0.87; rsquared=0.44. p@chr6:32411190..32411212,- [rs13218331]	p@chr6:32411190..32411212,- [rs13218331]	rs3817969, rs13218331, rs3177928	chr6:32411190..32411212,-	p@chr6:32361485..32361498,-, p@chr6:32411062..32411086,-, p@chr6:32411190..32411212,-, p4@HLA-DRA, p@chr6:32412417..32412458,+, p@chr6:32412534..32412660,+, p@chr6:32412666..32412686,+, p@chr6:32412702..32412709,+, p@chr6:32412734..32412747,+	0	0.26	0.135329	0.31
p@chr8:145010972..145010996,- [rs6993938]			p@chr8:145010972..145010996,- [rs6993938]	rs7014582, rs6993938, rs7832643, rs7015812, rs6985603	chr8:145010972..145010996,-	p@chr8:144990252..144990295,-, p@chr8:145010972..145010996,-, enhancer@chr8:145022492-145023108, p@chr8:145079498..145079535,+, p4@SPATC1, p2@SPATC1, p3@SPATC1, p1@SPATC1	0	0.3	0.073632	0.21
p@chr19:45242420..45242462,+ [rs1531517]			p@chr19:45242420..45242462,+ [rs1531517]	rs10422616, rs10421283, rs2927438, rs1531517, rs2965174	chr19:45242420..45242462,+	enhancer@chr19:45189303-45189576, enhancer@chr19:45242034-45242469, p@chr19:45242084..45242119,-, p@chr19:45242401..45242412,+, p@chr19:45242420..45242462,+, p@chr19:45245296..45245327,+	0	0.3	0.0752846	0.21
		rs1531517:rs10422182 D'=0.62; rsquared=0.22. p@chr19:45159154..45159158,+ [rs10422182]	p@chr19:45159154..45159158,+ [rs10422182]	rs10422182	chr19:45159154..45159158,+	p@chr19:45159154..45159158,+	0	0.09	0.639368	0.82
chr19:11031515..11031547,+ [rs2288842]			chr19:11031515..11031547,+ [rs2288842]	rs2288842	chr19:11031515..11031547,+	chr19:11031515..11031547,+	0	0.29	0.0877708	0.23
		rs2288842:rs11085749 D'=1.0; rsquared=0.61. p@chr19:10961151..10961183,+ [rs11085749]	p@chr19:10961151..10961183,+ [rs11085749]	rs11085749	chr19:10961151..10961183,+	p@chr19:10961151..10961183,+	0	0.17	0.347962	0.57
p4@SH2B3 [rs739496]			p4@SH2B3 [rs739496]	rs739496	chr12:111887748..111887752,+	p4@SH2B3	0	0.29	0.0899743	0.23
p@chr2:136594382..136594389,+ [rs2236783]			p@chr2:136594382..136594389,+ [rs2236783]	rs2236783	chr2:136594382..136594389,+	p@chr2:136594310..136594317,+, p@chr2:136594382..136594389,+, p@chr2:136594392..136594405,+	0	0.29	0.0907088	0.23
p1@NAT2 [rs4646246]			p1@NAT2 [rs4646246]	rs4646246	chr8:18248786..18248805,+	p2@NAT2, p1@NAT2	0	0.29	0.0952993	0.24
enhancer@chr20:34127589-34128004 [rs2104417]			enhancer@chr20:34127589-34128004 [rs2104417]	rs2104417	chr20:34127589-34128004	enhancer@chr20:34127589-34128004	0	0.27	0.127249	0.31
p5@RBM12 [rs6121015]			p5@RBM12 [rs6121015]	rs6121015	chr20:34243106..34243137,-	chr20:34242887..34242907,-, p3@RBM12, p4@RBM12, p5@RBM12	0	0.26	0.139001	0.31
p31@CORO1C [rs3741782]			p31@CORO1C [rs3741782]	rs3741782	chr12:109094948..109094959,-	p31@CORO1C	0	0.26	0.139185	0.31
p23@USP1 [rs646179]			p23@USP1 [rs646179]	rs631106, rs646179, rs998403, rs1305521	chr1:62903005..62903020,+	p4@USP1, p1@USP1, p11@USP1, p23@USP1, enhancer@chr1:62928310-62928608, p@chr1:62928606..62928608,+, enhancer@chr1:62948948-62949316	0	0.25	0.165443	0.36
p4@GSTM4 [rs1010167]			p4@GSTM4 [rs1010167]	rs1010167	chr1:110198761..110198791,+	p2@GSTM2,p5@GSTM4, p1@GSTM4, p4@GSTM4, p3@GSTM4, p2@GSTM4	0	0.23	0.201065	0.42
p16@HLX [rs17597773]			p16@HLX [rs17597773]	rs3806325, rs17597773	chr1:221054922..221054933,+	p@chr1:221051486..221051503,-, p@chr1:221054729..221054743,-, p@chr1:221054751..221054771,-, p@chr1:221054774..221054789,-, p9@HLX, p16@HLX	0	0.23	0.205288	0.42
p@chr6:32658073..32658091,- [rs9469220]			p@chr6:32658073..32658091,- [rs9469220]	rs17533167, rs17599077, rs12528365, rs12528368, rs9469220	chr6:32658073..32658091,-	enhancer@chr6:32590770-32591146, p@chr6:32590879..32590905,-, enhancer@chr6:32653438-32653801, p@chr6:32653438..32653462,-, p@chr6:32658073..32658091,-	0	0.22	0.219978	0.44
p12@PLCG1 [rs6124323]			p12@PLCG1 [rs6124323]	rs6124323	chr20:39794445..39794469,+	p12@PLCG1	0	0.21	0.248623	0.48
p@chr1:25756820..25756837,+ [rs9438904]			p@chr1:25756820..25756837,+ [rs9438904]	rs9438904	chr1:25756820..25756837,+	p1@RHCE, p@chr1:25756820..25756837,+	0	0.2	0.262027	0.49
p@chr6:31239406..31239455,+ [rs9264664]			p@chr6:31239406..31239455,+ [rs9264664]	rs9264606, rs9264608, rs9264664, rs7767581, rs5010528	chr6:31239406..31239455,+	chr6:31237739..31237758,+, p12@HLA-C, p5@HLA-C, p6@HLA-C, p@chr6:31239406..31239455,+, p1@HLA-C, p@chr6:31240053..31240069,+, p@chr6:31240851..31240879,-	0	0.2	0.276533	0.51
p1@POC5 [rs2291630]			p1@POC5 [rs2291630]	rs2291630	chr5:75013193..75013278,-	p1@POC5, p1@LOC441087	0	0.19	0.302424	0.53
		rs2291630:rs2047059 D'=1.0; rsquared=0.64. p2@POC5 [rs2047059]	p2@POC5 [rs2047059]	rs2047059	chr5:75008244..75008286,-	p2@POC5	0	0.14	0.467499	0.69
		rs2291630:rs7715806 D'=0.95; rsquared=0.39. enhancer@chr5:75034241-75034569 [rs7715806]	enhancer@chr5:75034241-75034569 [rs7715806]	rs7715806	chr5:75034241-75034569	enhancer@chr5:75034241-75034569	0	0.1	0.580242	0.76
		rs2291630:rs34358 D'=1.0; rsquared=0.47. p@chr5:74965139..74965165,+ [rs34358]	p@chr5:74965139..74965165,+ [rs34358]	rs34358	chr5:74965139..74965165,+	p@chr5:74965008..74965021,-, p@chr5:74965139..74965165,+	0	0.08	0.663423	0.82
p1@SLC44A4 [rs605203]			p1@SLC44A4 [rs605203]	rs605203	chr6:31846768..31846780,-	p1@SLC44A4	0	0.19	0.30426	0.53
chr20:39634184..39634189,- [rs1000410]			chr20:39634184..39634189,- [rs1000410]	rs1000410	chr20:39634184..39634189,-	p@chr20:39634066..39634133,-, chr20:39634184..39634189,-	0	0.17	0.360264	0.57
enhancer@chr16:56985400-56985562 [rs72786786, rs12448528]			enhancer@chr16:56985400-56985562 [rs72786786, rs12448528]	rs72786786, rs12448528	chr16:56985400-56985562	enhancer@chr16:56985400-56985562	0	0.17	0.367426	0.57
p@chr1:63266602..63266609,- [rs11208033]			p@chr1:63266602..63266609,- [rs11208033]	rs11208033	chr1:63266602..63266609,-	p@chr1:63266602..63266609,-	0	0.17	0.368711	0.57
chr19:10742301..10742328,+ [rs2288904, rs1560711]			chr19:10742301..10742328,+ [rs2288904, rs1560711]	rs2288904, rs1560711	chr19:10742301..10742328,+	chr19:10742301..10742328,+	0	0.15	0.41278	0.63
p@chr12:112212004..112212016,+ [rs2238151]			p@chr12:112212004..112212016,+ [rs2238151]	rs886205, rs2238151	chr12:112212004..112212016,+	p1@ALDH2, p@chr12:112211973..112211988,+, p@chr12:112212004..112212016,+	0	0.15	0.422512	0.64
p@chr2:216286925..216286942,- [rs1250248]			p@chr2:216286925..216286942,- [rs1250248]	rs1250248, rs13423742, rs1250242, rs1250259	chr2:216286925..216286942,-	p@chr2:216286835..216286854,-, p@chr2:216286866..216286877,-, p@chr2:216286896..216286912,-, p@chr2:216286925..216286942,-, p@chr2:216286951..216286963,-, p@chr2:216288084..216288131,+, p@chr2:216296541..216296600,+, p@chr2:216300364..216300450,+, p4@ENST00000412951, p2@ENST00000412951, p1@ENST00000412951	0	0.13	0.486963	0.7
enhancer@chr14:94813306-94813452 [rs926144]			enhancer@chr14:94813306-94813452 [rs926144]	rs926144	chr14:94813306-94813452	enhancer@chr14:94813306-94813452	0	0.13	0.48733	0.7
p4@FUT1 [rs838136]			p4@FUT1 [rs838136]	rs838136	chr19:49256171..49256183,-	p4@FUT1	0	0.13	0.5	0.7
p3@SPTY2D1 [rs7943121]			p3@SPTY2D1 [rs7943121]	rs7943121, rs10832962	chr11:18655948..18655965,-	p1@SPTY2D1, p2@SPTY2D1, p3@SPTY2D1, p5@SPTY2D1, p7@SPTY2D1, p4@SPTY2D1	0	0.12	0.502938	0.7
enhancer@chr5:74805918-74806308 [rs5744533]			enhancer@chr5:74805918-74806308 [rs5744533]	rs4704223, rs13360099, rs5744533	chr5:74805918-74806308	p@chr5:74773469..74773473,-, p@chr5:74781125..74781139,-, enhancer@chr5:74805918-74806308	0	0.11	0.560962	0.76
p@chr10:113928643..113928689,- [rs2803616]			p@chr10:113928643..113928689,- [rs2803616]	rs2803616	chr10:113928643..113928689,-	p@chr10:113928643..113928689,-	0	0.11	0.569409	0.76
p1@ENST00000364447 [rs1003116]			p1@ENST00000364447 [rs1003116]	rs1003116	chr1:93166488..93166504,-	p1@ENST00000364447	0	0.1	0.59989	0.78
enhancer@chr19:46018095-46018753 [rs7255743]			enhancer@chr19:46018095-46018753 [rs7255743]	rs7255743	chr19:46018095-46018753	enhancer@chr19:46018095-46018753	0	0.08	0.662137	0.82
enhancer@chr2:136816831-136817220 [rs749873]			enhancer@chr2:136816831-136817220 [rs749873]	rs749873	chr2:136816831-136817220	enhancer@chr2:136816831-136817220	0	0.08	0.698311	0.85
p@chr3:12704990..12705013,- [rs904453]			p@chr3:12704990..12705013,- [rs904453]	rs904453	chr3:12704990..12705013,-	p@chr3:12704956..12704973,-, p@chr3:12704990..12705013,-	0	0.07	0.69978	0.85
p@chr11:117075245..117075293,- [rs508487]			p@chr11:117075245..117075293,- [rs508487]	rs508487	chr11:117075245..117075293,-	p@chr11:117075245..117075293,-	0	0.06	0.751744	0.87
enhancer@chr1:109754796-109754995 [rs187413240]			enhancer@chr1:109754796-109754995 [rs187413240]	rs187413240	chr1:109754796-109754995	enhancer@chr1:109754796-109754995	0	0.06	0.764231	0.87
enhancer@chr11:61713558-61713889 [rs1534842]			enhancer@chr11:61713558-61713889 [rs1534842]	rs1534842	chr11:61713558-61713889	enhancer@chr11:61713558-61713889	0	0.06	0.764965	0.87
p@chr6:16131425..16131449,+ [rs2235215, rs2066905]			p@chr6:16131425..16131449,+ [rs2235215, rs2066905]	rs2235215, rs2066905	chr6:16131425..16131449,+	p@chr6:16131425..16131449,+	0	0.06	0.773228	0.87
enhancer@chr8:59311673-59312115 [rs1030431]			enhancer@chr8:59311673-59312115 [rs1030431]	rs1030431	chr8:59311673-59312115	enhancer@chr8:59311673-59312115	0	0.05	0.795079	0.88
p@chr2:135893438..135893485,+ [rs10445686]			p@chr2:135893438..135893485,+ [rs10445686]	rs10445686	chr2:135893438..135893485,+	p@chr2:135893438..135893485,+	0	0.04	0.844289	0.92
enhancer@chr6:34663389-34663600 [rs3800457]			enhancer@chr6:34663389-34663600 [rs3800457]	rs3800457	chr6:34663389-34663600	enhancer@chr6:34663389-34663600	0	0.04	0.862101	0.92
enhancer@chr1:92668364-92668570 [rs3131816]			enhancer@chr1:92668364-92668570 [rs3131816]	rs3131816	chr1:92668364-92668570	enhancer@chr1:92668364-92668570	0	0.03	0.867976	0.92
p3@C17orf57 [rs2271803]			p3@C17orf57 [rs2271803]	rs2271803	chr17:45401139..45401143,+	p3@C17orf57	0	0.03	0.870914	0.92
p@chr5:74964235..74964256,+ [rs7715739, rs369034591]			p@chr5:74964235..74964256,+ [rs7715739, rs369034591]	rs7715739, rs369034591	chr5:74964235..74964256,+	p@chr5:74964235..74964256,+	0	0.02	0.925083	0.96
p1@ATXN2 [rs695871]			p1@ATXN2 [rs695871]	rs695871	chr12:112037077..112037130,-	p8@ATXN2, p6@ATXN2, p1@ATXN2	0	0.02	0.93206	0.96
p@chr6:32078154..32078167,- [rs3807039]			p@chr6:32078154..32078167,- [rs3807039]	rs3807039	chr6:32078154..32078167,-	p@chr6:32078154..32078167,-	0	0.02	0.941241	0.96
enhancer@chr1:25802039-25802147 [rs66844552]			enhancer@chr1:25802039-25802147 [rs66844552]	rs66844552	chr1:25802039-25802147	enhancer@chr1:25802039-25802147	0	0.01	0.954462	0.96
p@chr6:31512638..31512648,- [rs2071593]			p@chr6:31512638..31512648,- [rs2071593]	rs2071593	chr6:31512638..31512648,-	p@chr6:31512450..31512515,-, p@chr6:31512638..31512648,-	0	0	1	1
Total cholesterol
Top promoter[SNPs in top promoter]		Linkage	Top promoter[SNPs in top promoter]	promoter snps in region	chosen promoter id	promoters	original p	Corrected coexpression score	raw p(perm)	FDR
p58@APOB [rs533617]			p58@APOB [rs533617]	rs1042034, rs1801702, rs1042031, rs1801701, rs676210, rs6413458, rs693, rs533617, rs673548, rs12713843, rs1800478, rs1367117, rs12714264, rs1800481, rs7567653, rs79428416	chr2:21233797..21233804,-	p@chr2:21224999..21225013,-, p@chr2:21225044..21225056,-, p44@APOB, p60@APOB, p3@APOB, p19@APOB, p9@APOB, p23@APOB, p47@APOB, p40@APOB, p30@APOB, p28@APOB, p4@APOB, p94@APOB, p67@APOB, p84@APOB, p35@APOB, p32@APOB, p15@APOB, p75@APOB, p20@APOB, p13@APOB, p5@APOB, p7@APOB, p2@BC172787, p5@BC172787, p1@BC172787, p3@BC172787, p13@BC172787, p4@BC172787, p6@BC172787, p57@APOB, p39@APOB, p29@APOB, p58@…	0	0.74	0	0
p@chr7:44581054..44581057,+ [rs41279633, rs17655652]			p@chr7:44581054..44581057,+ [rs41279633, rs17655652]	rs41279633, rs17655652	chr7:44581054..44581057,+	p1@NPC1L1, p2@NPC1L1, p@chr7:44581054..44581057,+	0	0.68	0	0
		rs17655652:rs732797 D'=0.92; rsquared=0.4. p@chr7:44646674..44646689,+ [rs732797]	p@chr7:44646674..44646689,+ [rs732797]	rs732797, rs1434961, rs1295021	chr7:44646674..44646689,+	p@chr7:44646674..44646689,+, enhancer@chr7:44657226-44657498, p@chr7:44657448..44657459,+, p@chr7:44661060..44661101,-	0	0.26	0.137899	0.3
p6@HNF1A-AS1 [rs1169286]			p6@HNF1A-AS1 [rs1169286]	rs1169286	chr12:121418749..121418758,-	p6@HNF1A-AS1, p3@HNF1A-AS1	0	0.65	0	0
		rs1169286:rs2258287 D'=0.68; rsquared=0.39. p1@C12orf43 [rs2258287]	p1@C12orf43 [rs2258287]	rs2258287	chr12:121454282..121454304,-	p1@C12orf43	0	0.16	0.393059	0.61
p2@ENST00000518619 [rs11774381, rs9987289, rs4841132]			p2@ENST00000518619 [rs11774381, rs9987289, rs4841132]	rs11774381, rs9987289, rs4841132	chr8:9183625..9183635,+	p1@ENST00000518619, p2@ENST00000518619	0	0.64	0	0
		rs9987289:rs7357361 D'=1.0; rsquared=0.57. enhancer@chr8:9219931-9220273 [rs7357361]; rs4841132:rs7357361 D'=1.0; rsquared=0.57. enhancer@chr8:9219931-9220273 [rs7357361]	enhancer@chr8:9219931-9220273 [rs7357361]	rs7357361	chr8:9219931-9220273	enhancer@chr8:9219931-9220273	0	0.26	0.142369	0.3
p3@LIPC [rs2070895]			p3@LIPC [rs2070895]	rs2070895	chr15:58724170..58724183,+	p3@LIPC, p2@LIPC	0	0.61	0	0
p5@ABCA1 [rs1800978]			p5@ABCA1 [rs1800978]	rs2000069, rs4149267, rs1800978, rs3905001, rs13284054, rs4100654, rs2575879, rs2777794	chr9:107665982..107665994,-	enhancer@chr9:107635337-107635884, p@chr9:107635759..107635781,+, p@chr9:107635820..107635841,+, p10@ABCA1, p11@ABCA1, p3@ABCA1, p5@ABCA1, p7@ABCA1, p@chr9:107667895..107667910,-, p@chr9:107667938..107667949,-, enhancer@chr9:107668768-107669725, p@chr9:107668768..107668795,-, p@chr9:107669028..107669032,-, p@chr9:107669218..107669251,+, p@chr9:107669298..107669311,+, p@chr9:107669326..107669336,+	0	0.58	0	0
p3@ABCG5 [rs11887534]			p3@ABCG5 [rs11887534]	rs10208987, rs6756629, rs11887534	chr2:44065946..44065958,-	p@chr2:44043042..44043044,-, p@chr2:44065065..44065102,-, p3@ABCG5, p2@ABCG5	0	0.54	0	0
		rs11887534:rs13395550 D'=0.25; rsquared=0.06. enhancer@chr2:44007303-44007575 [rs13395550]	enhancer@chr2:44007303-44007575 [rs13395550]	rs13395550	chr2:44007303-44007575	enhancer@chr2:44007303-44007575	0	0.08	0.674116	0.81
p1@GPN1 [rs3749147]			p1@GPN1 [rs3749147]	rs3749147	chr2:27851885..27851930,+	p1@GPN1	0	0.54	0	0
		same SNP, different promoter: p1@CCDC121 [rs3749147]	p1@CCDC121 [rs3749147]	rs3749147	chr2:27851843..27851885,-	p3@CCDC121, p1@CCDC121	0	0.06	0.780334	0.87
enhancer@chr6:30731311-30731508 [rs3095338]			enhancer@chr6:30731311-30731508 [rs3095338]	rs3129996, rs3095340, rs3095338, rs3129978, rs3132600, rs3132599, rs3129984, rs1264350, rs1264347, rs1264341	chr6:30731311-30731508	enhancer@chr6:30651242-30651620, enhancer@chr6:30726704-30727354, enhancer@chr6:30731311-30731508, p@chr6:30746129..30746152,-, enhancer@chr6:30748126-30748169, enhancer@chr6:30761567-30761766, enhancer@chr6:30796195-30796565, p1@LINC00243, p2@LINC00243, chr6:30798448..30798455,-, p@chr6:30802504..30802513,-	0	0.52	0	0
		rs3095338:rs8233 D'=0.91; rsquared=0.62. p@chr6:30692851..30692934,+ [rs8233]	p@chr6:30692851..30692934,+ [rs8233]	rs8233, rs886422, rs2532934	chr6:30692851..30692934,+	p@chr6:30692851..30692934,+, p@chr6:30693009..30693021,+, p@chr6:30693048..30693070,+, p23@DDR1, p@chr6:30895024..30895028,+	0	0.17	0.36519	0.58
p3@HAVCR1 [rs67960962]			p3@HAVCR1 [rs67960962]	rs67960962	chr5:156485016..156485034,-	p3@HAVCR1	0	0.51	0	0
		rs67960962:rs6882076 D'=0.83; rsquared=0.31. p1@TIMD4 [rs6882076]	p1@TIMD4 [rs6882076]	rs6882076	chr5:156390230..156390246,-	p1@TIMD4	0	0.06	0.758249	0.87
p1@APOA5 [rs651821]			p1@APOA5 [rs651821]	rs651821, rs5110	chr11:116662593..116662620,-	p1@APOA5, p@chr11:116691448..116691464,-, p@chr11:116691490..116691522,-, p@chr11:116691672..116691682,-	0	0.51	0	0
		rs651821:rs689243 D'=1.0; rsquared=0.21. enhancer@chr11:116722234-116722744 [rs689243]	enhancer@chr11:116722234-116722744 [rs689243]	rs689243, rs2080586, rs11216164	chr11:116722234-116722744	enhancer@chr11:116722234-116722744, p@chr11:116733003..116733018,-, p@chr11:116734451..116734464,-	0	0	0.98738	1
p1@ENST00000447070 [rs6760828]			p1@ENST00000447070 [rs6760828]	rs6760828, rs7563162	chr2:27579140..27579158,+	p5@GTF3C2, p1@ENST00000447070, enhancer@chr2:27631105-27631216	0	0.5	0	0
		rs6760828:rs4665963 D'=0.77; rsquared=0.31. p@chr2:27528919..27528940,+ [rs4665963]	p@chr2:27528919..27528940,+ [rs4665963]	rs4665963	chr2:27528919..27528940,+	p@chr2:27528919..27528940,+	0	0.33	0.0433811	0.12
p@chr16:72075048..72075055,- [rs9932951]			p@chr16:72075048..72075055,- [rs9932951]	rs4788600, rs3764310, rs9932951, rs2000999	chr16:72075048..72075055,-	p@chr16:72047835..72047846,-, p@chr16:72048279..72048295,+, p@chr16:72048310..72048324,+, p@chr16:72048344..72048355,+, p@chr16:72048389..72048422,+, p@chr16:72075048..72075055,-, p@chr16:72108070..72108089,+, p@chr16:72108093..72108100,+, p@chr16:72108103..72108121,+	0	0.48	0.000131458	0
		rs9932951:rs3213422 D'=0.29; rsquared=0.08. p1@DHODH [rs34270657, rs3213422]	p1@DHODH [rs34270657, rs3213422]	rs34270657, rs3213422	chr16:72042636..72042660,+	p1@DHODH	0	0.43	0.00131458	0.01
p1@SPTY2D1 [rs7943121]			p1@SPTY2D1 [rs7943121]	rs7943121, rs10832962	chr11:18655879..18655901,-	p1@SPTY2D1, p2@SPTY2D1, p3@SPTY2D1, p5@SPTY2D1, p7@SPTY2D1, p4@SPTY2D1	0	0.48	0.000131458	0
p@chr19:19616795..19616800,+ [rs1063966]			p@chr19:19616795..19616800,+ [rs1063966]	rs1063966	chr19:19616795..19616800,+	p@chr19:19616795..19616800,+	0	0.48	0.000131458	0
		rs1063966:rs73004933 D'=1.0; rsquared=0.19. p@chr19:19675738..19675742,- [rs73004933]	p@chr19:19675738..19675742,- [rs73004933]	rs2074296, rs67215661, rs12460764, rs59148799, rs12973258, rs17288409, rs7250658, rs73004933	chr19:19675738..19675742,-	p4@HAPLN4, p2@HAPLN4, p5@HAPLN4, p1@SUGP1, p1@MAU2, p@chr19:19431888..19431912,-, enhancer@chr19:19483893-19484092, enhancer@chr19:19488658-19488936, chr19:19488822..19488846,+, enhancer@chr19:19504149-19504345, p1@LOC100128429, p@chr19:19675738..19675742,-	0	0.37	0.015512	0.06
		rs1063966:rs4808967 D'=1.0; rsquared=1.0. p@chr19:19640454..19640461,+ [rs4808967]	p@chr19:19640454..19640461,+ [rs4808967]	rs4808967	chr19:19640454..19640461,+	p@chr19:19640431..19640450,+, p@chr19:19640454..19640461,+	0	0.11	0.555409	0.76
p@chr6:26500524..26500540,+ [rs13194984]			p@chr6:26500524..26500540,+ [rs13194984]	rs13194984	chr6:26500524..26500540,+	p@chr6:26500524..26500540,+	0	0.47	0.000131458	0
p3@SLC22A1 [rs12208357]			p3@SLC22A1 [rs12208357]	rs12208357	chr6:160543369..160543379,+	p3@SLC22A1	0	0.46	0.000525831	0
p6@RBM39 [rs2425090]			p6@RBM39 [rs2425090]	rs6121015, rs2425090	chr20:34304657..34304662,-	chr20:34242887..34242907,-, p3@RBM12, p4@RBM12, p5@RBM12, p@chr20:34304613..34304617,-, p6@RBM39	0	0.46	0.000525831	0
p16@HLA-DQA1 [rs9272775]			p16@HLA-DQA1 [rs9272775]	rs17533167, rs9271586, rs3129763, rs17599077, rs9271612, rs9271613, rs9272775, rs3891175, rs12528365, rs12528368, rs9469220, rs1049110, rs2071470, rs2857106, rs241448, rs241447, rs241452	chr6:32610515..32610535,+	enhancer@chr6:32590770-32591146, p@chr6:32590879..32590905,-, enhancer@chr6:32591414-32591731, p16@HLA-DQA1, p1@HLA-DQB1, enhancer@chr6:32653438-32653801, p@chr6:32653438..32653462,-, p@chr6:32658073..32658091,-, p@chr6:32726761..32726781,-, p1@HLA-DOB, p2@HLA-DOB, enhancer@chr6:32787339-32787575, p4@TAP2	0	0.44	0.00105166	0.01
p37@CFB [rs2072633]			p37@CFB [rs2072633]	rs2517546, rs3094216, rs3869109, rs9264594, rs9264608, rs9264606, rs68037221, rs9264664, rs7767581, rs2844622, rs5010528, rs2596501, rs2770, rs2523452, rs3099840, rs2596473, rs2516393, rs2071593, rs2071592, rs3219184, rs909253, rs1041981, rs1800629, rs2736171, rs3132450, rs3117582, rs1065356, rs3131383, rs3101018, rs3115671, rs660594, rs660550, rs605203, rs535586, rs2072633, rs389884	chr6:31919711..31919718,+	enhancer@chr6:31008975-31009347, p@chr6:31083761..31083775,-, p@chr6:31083817..31083824,-, p@chr6:31083839..31083849,-, p@chr6:31083856..31083866,-, p@chr6:31184194..31184242,+, p@chr6:31184444..31184457,+, p@chr6:31236747..31236823,-, chr6:31237739..31237758,+, p12@HLA-C, p5@HLA-C, p6@HLA-C, p@chr6:31239406..31239455,+, p1@HLA-C, p@chr6:31240053..31240069,+, p@chr6:31240851..31240879,-, p@chr6:3…	0	0.44	0.00105166	0.01
p@chr2:27975692..27975750,+ [rs6547796]			p@chr2:27975692..27975750,+ [rs6547796]	rs6547796	chr2:27975692..27975750,+	p@chr2:27975692..27975750,+	0	0.43	0.00131458	0.01
		rs6547796:rs13013484 D'=1.0; rsquared=0.9. p@chr2:27988549..27988557,- [rs13013484]	p@chr2:27988549..27988557,- [rs13013484]	rs13013484	chr2:27988549..27988557,-	enhancer@chr2:27988549-27989353, p@chr2:27988549..27988557,-	0	0.17	0.361378	0.58
chr6:160770176..160770186,- [rs474513, rs539298]			chr6:160770176..160770186,- [rs474513, rs539298]	rs474513, rs539298, rs3105749	chr6:160770176..160770186,-	chr6:160770176..160770186,-, p@chr6:160821141..160821145,+	0	0.43	0.00170895	0.01
p7@PCSK9 [rs11591147]			p7@PCSK9 [rs11591147]	rs11591147	chr1:55505693..55505698,+	p7@PCSK9	0	0.42	0.00289207	0.02
p@chr19:45411878..45411884,- [rs7412]			p@chr19:45411878..45411884,- [rs7412]	rs395908, rs405509, rs7412, rs12721109, rs5158	chr19:45411878..45411884,-	enhancer@chr19:45373382-45373614, p1@APOE, p@chr19:45411878..45411884,-, p@chr19:45412009..45412026,+, p3@AJ249921, enhancer@chr19:45447166-45447474	0	0.41	0.00446957	0.02
p1@FEN1 [rs412334, rs174538]			p1@FEN1 [rs412334, rs174538]	rs2269928, rs149803, rs174532, rs412334, rs174538, rs174548, rs174549, rs174550, rs174561, rs968567, rs2072114, rs498793, rs972354	chr11:61560348..61560419,+	p@chr11:61537818..61537845,+, chr11:61538963..61538976,+, p@chr11:61538994..61539023,+, p@chr11:61539002..61539027,-, p@chr11:61548732..61548749,-, p1@C11orf10, p1@FEN1, p14@FADS1, p7@FADS1, p@chr11:61582877..61582920,+, p6@FADS2, p3@FADS2, p1@FADS2, p@chr11:61605283..61605303,+, p10@FADS2, p16@BEST1, p1@BEST1, p6@BEST1	0	0.4	0.00670435	0.03
		same SNP, different promoter: p4@C11orf10 [rs412334]; rs174538:rs412334 D'=1.0; rsquared=0.07. p4@C11orf10 [rs412334]	p4@C11orf10 [rs412334]	rs412334	chr11:61560254..61560264,-	p4@C11orf10	0	0.35	0.0222164	0.07
p1@SPATC1 [rs6985603]			p1@SPATC1 [rs6985603]	rs7014582, rs6993938, rs7832643, rs6985603	chr8:145086574..145086611,+	p@chr8:144990252..144990295,-, p@chr8:145010972..145010996,-, enhancer@chr8:145022492-145023108, p4@SPATC1, p2@SPATC1, p3@SPATC1, p1@SPATC1	0	0.39	0.00920205	0.04
p@chr18:47176875..47176889,+ [rs4939886, rs4939887, rs4939888]			p@chr18:47176875..47176889,+ [rs4939886, rs4939887, rs4939888]	rs12955001, rs4939886, rs4939887, rs4939888	chr18:47176875..47176889,+	p@chr18:47139060..47139064,+, p@chr18:47176875..47176889,+	0	0.39	0.00933351	0.04
p1@NAT2 [rs4646246]			p1@NAT2 [rs4646246]	rs4646246	chr8:18248786..18248805,+	p2@NAT2, p1@NAT2	0	0.38	0.0106481	0.05
p@chr9:136154265..136154271,- [rs579459, rs649129]			p@chr9:136154265..136154271,- [rs579459, rs649129]	rs579459, rs649129, rs56343119	chr9:136154265..136154271,-	p@chr9:136154265..136154271,-, p@chr9:136237734..136237750,-, p@chr9:136237940..136237954,+	0	0.38	0.01262	0.05
		rs579459:rs568203 D'=1.0; rsquared=0.1. p@chr9:136151396..136151407,- [rs568203]; rs649129:rs568203 D'=1.0; rsquared=0.1. p@chr9:136151396..136151407,- [rs568203]	p@chr9:136151396..136151407,- [rs568203]	rs568203	chr9:136151396..136151407,-	p@chr9:136151341..136151346,-, p@chr9:136151396..136151407,-	0	0.26	0.129749	0.3
enhancer@chr8:126446642-126447323 [rs2385114]			enhancer@chr8:126446642-126447323 [rs2385114]	rs2980874, rs2385114, rs17405319	chr8:126446642-126447323	p@chr8:126444674..126444689,-, p19@TRIB1, p15@TRIB1, enhancer@chr8:126446642-126447323, p@chr8:126447258..126447275,+, p12@TRIB1	0	0.37	0.0163008	0.06
p@chr1:63112277..63112278,+ [rs1168085]			p@chr1:63112277..63112278,+ [rs1168085]	rs1168085	chr1:63112277..63112278,+	p@chr1:63112277..63112278,+	0	0.37	0.0163008	0.06
p3@NSMAF [rs2279460]			p3@NSMAF [rs2279460]	rs2279462, rs2279460, rs16923594	chr8:59508395..59508425,-	p15@NSMAF, p@chr8:59508065..59508084,+, p3@NSMAF, p17@NSMAF, p7@NSMAF, p@chr8:59510675..59510693,-	0	0.37	0.0170895	0.06
enhancer@chr20:34127589-34128004 [rs2104417]			enhancer@chr20:34127589-34128004 [rs2104417]	rs2104417	chr20:34127589-34128004	enhancer@chr20:34127589-34128004	0	0.36	0.0184041	0.07
p13@UGT1A6 [rs2070959]			p13@UGT1A6 [rs2070959]	rs2070959	chr2:234602245..234602255,+	p11@UGT1A6, p13@UGT1A6, p6@UGT1A6	0	0.36	0.0185356	0.07
		rs2070959:rs17864701 D'=0.92; rsquared=0.8. p2@DNAJB3 [rs17864701]	p2@DNAJB3 [rs17864701]	rs17864701	chr2:234652655..234652665,-	p1@DNAJB3, p2@DNAJB3	0	0.25	0.142895	0.3
p2@SPC24 [rs892114, rs7251031]			p2@SPC24 [rs892114, rs7251031]	rs3786721, rs6511720, rs8102912, rs17248748, rs1010679, rs2738456, rs892114, rs7251031	chr19:11266471..11266482,-	p@chr19:11146457..11146463,-, enhancer@chr19:11202212-11202837, p@chr19:11202456..11202473,+, enhancer@chr19:11205696-11206011, p@chr19:11205723..11205737,-, p@chr19:11205793..11205800,-, enhancer@chr19:11206953-11207150, p@chr19:11207131..11207150,+, p@chr19:11237072..11237076,+, p1@SPC24, p2@SPC24	0	0.36	0.0189299	0.07
enhancer@chr5:74805918-74806308 [rs5744533]			enhancer@chr5:74805918-74806308 [rs5744533]	rs4704223, rs13360099, rs5744533	chr5:74805918-74806308	p@chr5:74773469..74773473,-, p@chr5:74781125..74781139,-, enhancer@chr5:74805918-74806308	0	0.36	0.0195872	0.07
p1@AK311221 [rs9469089]			p1@AK311221 [rs9469089]	rs9469089, rs3134930	chr6:32146685..32146730,+	p1@AK311221, chr6:32191647..32191651,+	0	0.35	0.0268174	0.09
		rs9469089:rs3134931 D'=0.49; rsquared=0.14. p@chr6:32190527..32190536,- [rs3134931]	p@chr6:32190527..32190536,- [rs3134931]	rs1150754, rs3807039, rs3134931	chr6:32190527..32190536,-	enhancer@chr6:32050642-32051035, p@chr6:32078154..32078167,-, p@chr6:32190527..32190536,-	0	0.09	0.650848	0.81
p@chr16:68114139..68114174,+ [rs7188085]			p@chr16:68114139..68114174,+ [rs7188085]	rs7196789, rs20549, rs3785100, rs7204974, rs16957696, rs7188085	chr16:68114139..68114174,+	p1@PSKH1, p@chr16:67969524..67969643,-, p@chr16:67969649..67969718,-, p@chr16:67969838..67969863,+, p8@SLC12A4, p1@DPEP2, p@chr16:68033515..68033528,+, enhancer@chr16:68039646-68040046, enhancer@chr16:68113537-68113949, p@chr16:68113591..68113602,-, p@chr16:68114139..68114174,+	0	0.34	0.0311555	0.1
p@chr1:221054751..221054771,- [rs17597773]			p@chr1:221054751..221054771,- [rs17597773]	rs3806325, rs17597773	chr1:221054751..221054771,-	p@chr1:221051486..221051503,-, p@chr1:221054729..221054743,-, p@chr1:221054751..221054771,-, p@chr1:221054774..221054789,-, p9@HLX, p16@HLX	0	0.34	0.031287	0.1
p1@POC5 [rs2291630]			p1@POC5 [rs2291630]	rs2291630	chr5:75013193..75013278,-	p1@POC5, p1@LOC441087	0	0.33	0.0368082	0.11
		rs2291630:rs34358 D'=1.0; rsquared=0.47. p@chr5:74965139..74965165,+ [rs34358]	p@chr5:74965139..74965165,+ [rs34358]	rs34358	chr5:74965139..74965165,+	p@chr5:74965008..74965021,-, p@chr5:74965139..74965165,+	0	0.24	0.181543	0.37
		rs2291630:rs2047059 D'=1.0; rsquared=0.64. p2@POC5 [rs2047059]	p2@POC5 [rs2047059]	rs2047059	chr5:75008244..75008286,-	p2@POC5	0	0.17	0.366242	0.58
		rs2291630:rs7715806 D'=0.95; rsquared=0.39. enhancer@chr5:75034241-75034569 [rs7715806]	enhancer@chr5:75034241-75034569 [rs7715806]	rs7715806	chr5:75034241-75034569	enhancer@chr5:75034241-75034569	0	0.16	0.407256	0.63
p2@LY6G6C [rs805292]			p2@LY6G6C [rs805292]	rs805292	chr6:31689797..31689829,-	p2@LY6G6C	0	0.33	0.0368082	0.11
p@chr6:16131425..16131449,+ [rs2235215]			p@chr6:16131425..16131449,+ [rs2235215]	rs2235215	chr6:16131425..16131449,+	p@chr6:16131425..16131449,+	0	0.33	0.0379913	0.11
p@chr2:136594310..136594317,+ [rs2236783]			p@chr2:136594310..136594317,+ [rs2236783]	rs2236783	chr2:136594310..136594317,+	p@chr2:136594310..136594317,+, p@chr2:136594382..136594389,+, p@chr2:136594392..136594405,+	0	0.33	0.0432496	0.12
		rs2236783:rs1438307 D'=0.94; rsquared=0.85. p2@UBXN4 [rs1438307]	p2@UBXN4 [rs1438307]	rs1438307	chr2:136499305..136499381,+	p3@UBXN4, p4@UBXN4, p5@UBXN4, p2@UBXN4, p1@UBXN4	0	0.13	0.510845	0.74
enhancer@chr6:135435494-135435847 [rs9483788]			enhancer@chr6:135435494-135435847 [rs9483788]	rs9483788	chr6:135435494-135435847	enhancer@chr6:135435494-135435847	0	0.32	0.0494282	0.13
p1@HLA-DRB9 [rs13191565]			p1@HLA-DRB9 [rs13191565]	rs3817969, rs13218331, rs7192, rs3177928, rs7194, rs367566942, rs13191565	chr6:32441341..32441365,-	p@chr6:32361485..32361498,-, p@chr6:32411062..32411086,-, p@chr6:32411190..32411212,-, p4@HLA-DRA, p1@CU687129, p@chr6:32412417..32412458,+, p@chr6:32412534..32412660,+, p@chr6:32412666..32412686,+, p@chr6:32412702..32412709,+, p@chr6:32412734..32412747,+, p@chr6:32440995..32441004,+, p2@HLA-DRB9, p1@HLA-DRB9	0	0.31	0.0641514	0.17
p1@USP1 [rs646179]			p1@USP1 [rs646179]	rs631106, rs646179, rs998403, rs1305521	chr1:62902687..62902806,+	p4@USP1, p1@USP1, p11@USP1, p23@USP1, enhancer@chr1:62928310-62928608, p@chr1:62928606..62928608,+, enhancer@chr1:62948948-62949316	0	0.3	0.0767714	0.2
enhancer@chr19:45242034-45242469 [rs1531517]			enhancer@chr19:45242034-45242469 [rs1531517]	rs10422616, rs1531517	chr19:45242034-45242469	enhancer@chr19:45189303-45189576, enhancer@chr19:45242034-45242469, p@chr19:45242084..45242119,-, p@chr19:45242401..45242412,+, p@chr19:45242420..45242462,+	0	0.28	0.0920205	0.23
		rs1531517:rs10422182 D'=0.62; rsquared=0.22. p@chr19:45159154..45159158,+ [rs10422182]	p@chr19:45159154..45159158,+ [rs10422182]	rs10422182	chr19:45159154..45159158,+	p@chr19:45159154..45159158,+	0	0.09	0.658078	0.81
p@chr19:10961151..10961183,+ [rs11085749]			p@chr19:10961151..10961183,+ [rs11085749]	rs11085749	chr19:10961151..10961183,+	p@chr19:10961151..10961183,+	0	0.28	0.101354	0.25
		rs11085749:rs2288842 D'=1.0; rsquared=0.61. chr19:11031515..11031547,+ [rs2288842]	chr19:11031515..11031547,+ [rs2288842]	rs2288842	chr19:11031515..11031547,+	chr19:11031515..11031547,+	0	0.23	0.191928	0.38
p12@PLCG1 [rs6124323]			p12@PLCG1 [rs6124323]	rs6124323	chr20:39794445..39794469,+	p12@PLCG1	0	0.28	0.104378	0.25
enhancer@chr10:17254796-17255338 [rs7080366]			enhancer@chr10:17254796-17255338 [rs7080366]	rs7080366	chr10:17254796-17255338	enhancer@chr10:17254796-17255338	0	0.27	0.110162	0.26
p2@LPIN3 [rs6029636]			p2@LPIN3 [rs6029636]	rs6029636	chr20:39969519..39969596,+	p1@LPIN3, p2@LPIN3	0	0.26	0.1262	0.29
p1@ENST00000408001 [rs2764205]			p1@ENST00000408001 [rs2764205]	rs2764205	chr6:34711914..34711921,+	p1@ENST00000408001	0	0.25	0.142895	0.3
		rs2764205:rs3800457 D'=1.0; rsquared=0.96. enhancer@chr6:34663389-34663600 [rs3800457]	enhancer@chr6:34663389-34663600 [rs3800457]	rs3800457	chr6:34663389-34663600	enhancer@chr6:34663389-34663600	0	0.08	0.684501	0.81
enhancer@chr16:56985400-56985562 [rs12448528, rs72786786]			enhancer@chr16:56985400-56985562 [rs12448528, rs72786786]	rs12448528, rs72786786	chr16:56985400-56985562	enhancer@chr16:56985400-56985562	0	0.25	0.143158	0.3
p@chr9:15298766..15298791,+ [rs675849]			p@chr9:15298766..15298791,+ [rs675849]	rs675849	chr9:15298766..15298791,+	p@chr9:15298766..15298791,+	0	0.24	0.17313	0.36
p@chr1:63266602..63266609,- [rs11208033, rs10493328, rs4409690]			p@chr1:63266602..63266609,- [rs11208033, rs10493328, rs4409690]	rs11208033, rs10493328, rs4409690	chr1:63266602..63266609,-	p@chr1:63266602..63266609,-	0	0.23	0.189431	0.38
		rs11208033:rs12122434 D'=1.0; rsquared=0.22. p@chr1:63261897..63261900,+ [rs12122434]; rs10493328:rs12122434 D'=1.0; rsquared=0.22. p@chr1:63261897..63261900,+ [rs12122434]; rs4409690:rs12122434 D'=1.0; rsquared=0.22. p@chr1:63261897..63261900,+ [rs12122434]	p@chr1:63261897..63261900,+ [rs12122434]	rs12122434	chr1:63261897..63261900,+	p@chr1:63261897..63261900,+	0	0.08	0.679111	0.81
p4@SH2B3 [rs739496]			p4@SH2B3 [rs739496]	rs739496	chr12:111887748..111887752,+	p4@SH2B3	0	0.23	0.196792	0.38
p3@C6orf10 [rs6913309, rs2050189]			p3@C6orf10 [rs6913309, rs2050189]	rs6913309, rs2050189	chr6:32339657..32339660,-	p3@C6orf10, p1@C6orf10, p2@C6orf10	0	0.21	0.240174	0.45
p@chr2:113841162..113841225,+ [rs6734238]			p@chr2:113841162..113841225,+ [rs6734238]	rs13409360, rs6734238	chr2:113841162..113841225,+	enhancer@chr2:113837856-113838205, enhancer@chr2:113840552-113841422, p@chr2:113840776..113840794,-, p@chr2:113840893..113840913,-, p@chr2:113840931..113840944,-, p@chr2:113840946..113840969,-, p@chr2:113841114..113841125,+, p@chr2:113841132..113841146,+, p@chr2:113841162..113841225,+, p@chr2:113841226..113841242,+	0	0.21	0.243066	0.45
p1@FRK [rs1999929]			p1@FRK [rs1999929]	rs1999929	chr6:116381918..116381977,-	p1@FRK, p3@FRK, p2@FRK	0	0.21	0.245037	0.45
p@chr16:71934252..71934256,+ [rs4788576]			p@chr16:71934252..71934256,+ [rs4788576]	rs2335713, rs4788576	chr16:71934252..71934256,+	enhancer@chr16:71904264-71904408, p@chr16:71934252..71934256,+	0	0.2	0.261075	0.48
enhancer@chr2:136816831-136817220 [rs749873]			enhancer@chr2:136816831-136817220 [rs749873]	rs749873	chr2:136816831-136817220	enhancer@chr2:136816831-136817220	0	0.19	0.307743	0.55
		rs749873:rs309137 D'=0.86; rsquared=0.52. enhancer@chr2:136765824-136766130 [rs309137]	enhancer@chr2:136765824-136766130 [rs309137]	rs309137	chr2:136765824-136766130	enhancer@chr2:136765824-136766130	0	0.12	0.541738	0.76
		rs749873:rs6714750 D'=1.0; rsquared=0.55. enhancer@chr2:136783030-136783335 [rs6714750]	enhancer@chr2:136783030-136783335 [rs6714750]	rs6714750	chr2:136783030-136783335	enhancer@chr2:136783030-136783335	0	0.1	0.597476	0.79
p4@HMGCR [rs3761740]			p4@HMGCR [rs3761740]	rs3761740	chr5:74632334..74632364,+	p4@HMGCR	0	0.19	0.312344	0.56
enhancer@chr19:46018095-46018753 [rs7255743]			enhancer@chr19:46018095-46018753 [rs7255743]	rs7255743	chr19:46018095-46018753	enhancer@chr19:46018095-46018753	0	0.18	0.322072	0.56
p6@UBASH3B [rs7127978]			p6@UBASH3B [rs7127978]	rs7127978, rs11218771	chr11:122526607..122526614,+	p3@UBASH3B, p1@UBASH3B, p9@UBASH3B, p5@UBASH3B, p6@UBASH3B, chr11:122526685..122526694,+, p8@UBASH3B, p2@UBASH3B, enhancer@chr11:122587982-122588633	0	0.18	0.334297	0.58
enhancer@chr11:48004294-48004631 [rs7946766]			enhancer@chr11:48004294-48004631 [rs7946766]	rs7946766	chr11:48004294-48004631	enhancer@chr11:48004294-48004631	0	0.17	0.352307	0.58
chr20:39634184..39634189,- [rs1000410]			chr20:39634184..39634189,- [rs1000410]	rs1000410	chr20:39634184..39634189,-	p@chr20:39634066..39634133,-, chr20:39634184..39634189,-	0	0.17	0.359274	0.58
p@chr2:203131655..203131667,- [rs7581542]			p@chr2:203131655..203131667,- [rs7581542]	rs7581542	chr2:203131655..203131667,-	p@chr2:203131655..203131667,-	0	0.17	0.359932	0.58
chr11:118486256..118486298,+ [rs11603023]			chr11:118486256..118486298,+ [rs11603023]	rs11603023	chr11:118486256..118486298,+	chr11:118486256..118486298,+	0	0.17	0.369002	0.58
p@chr11:116980715..116980720,- [rs10892074]			p@chr11:116980715..116980720,- [rs10892074]	rs10892074, rs2306471	chr11:116980715..116980720,-	p@chr11:116980715..116980720,-, enhancer@chr11:117016262-117016599	0	0.15	0.43368	0.66
		rs10892074:rs508487 D'=1.0; rsquared=0.09. p@chr11:117075245..117075293,- [rs508487]	p@chr11:117075245..117075293,- [rs508487]	rs641620, rs2269397, rs508487	chr11:117075245..117075293,-	p@chr11:117074100..117074165,+, chr11:117074489..117074503,+, chr11:117074504..117074555,+, p@chr11:117075245..117075293,-	0	0.02	0.922834	0.96
enhancer@chr16:31129616-31130225 [rs9925964]			enhancer@chr16:31129616-31130225 [rs9925964]	rs9925964	chr16:31129616-31130225	enhancer@chr16:31129616-31130225	0	0.15	0.435257	0.66
p@chr12:112212004..112212016,+ [rs2238151]			p@chr12:112212004..112212016,+ [rs2238151]	rs2238151	chr12:112212004..112212016,+	p@chr12:112211973..112211988,+, p@chr12:112212004..112212016,+	0	0.14	0.449323	0.67
p4@GSTM4 [rs1010167]			p4@GSTM4 [rs1010167]	rs1010167	chr1:110198761..110198791,+	p2@GSTM2,p5@GSTM4, p1@GSTM4, p4@GSTM4, p3@GSTM4, p2@GSTM4	0	0.14	0.455239	0.67
p@chr17:76377571..76377602,- [rs4082919]			p@chr17:76377571..76377602,- [rs4082919]	rs4082919, rs4366775	chr17:76377571..76377602,-	enhancer@chr17:76377337-76378350, p@chr17:76377496..76377519,-, p@chr17:76377547..76377554,-, p@chr17:76377571..76377602,-, enhancer@chr17:76382008-76383398, p@chr17:76382279..76382292,+	0	0.13	0.513606	0.74
p@chr1:109784420..109784424,+ [rs688386]			p@chr1:109784420..109784424,+ [rs688386]	rs688386, rs12746961, rs1337248, rs6698843, rs464218, rs2228604, rs3768494, rs3768493, rs10858091	chr1:109784420..109784424,+	p@chr1:109784420..109784424,+, enhancer@chr1:109800134-109800539, p8@CELSR2, p4@CELSR2, p2@CELSR2, p10@CELSR2, p@chr1:109856077..109856090,-, p@chr1:109856117..109856176,-, p@chr1:109856200..109856211,-, p@chr1:109884725..109884745,-, p@chr1:109935515..109935518,-	0	0.12	0.527803	0.75
p@chr4:88057279..88057283,+ [rs1408]			p@chr4:88057279..88057283,+ [rs1408]	rs1408	chr4:88057279..88057283,+	p@chr4:88057279..88057283,+	0	0.12	0.549231	0.76
p6@SYN2 [rs3773364]			p6@SYN2 [rs3773364]	rs3773364	chr3:12190041..12190062,+	p4@SYN2, p19@SYN2, p6@SYN2	0	0.11	0.576969	0.78
chr19:10742301..10742328,+ [rs2288904, rs1560711]			chr19:10742301..10742328,+ [rs2288904, rs1560711]	rs2288904, rs1560711	chr19:10742301..10742328,+	chr19:10742301..10742328,+	0	0.11	0.585645	0.78
chr6:31808499..31808514,+ [rs599707]			chr6:31808499..31808514,+ [rs599707]	rs599707	chr6:31808499..31808514,+	chr6:31808499..31808514,+	0	0.1	0.588143	0.78
p1@ERGIC2 [rs2278093]			p1@ERGIC2 [rs2278093]	rs2278093	chr12:29534074..29534127,-	p1@ERGIC2, p2@ERGIC2	0	0.1	0.610227	0.8
p2@HLA-L [rs9391806]			p2@HLA-L [rs9391806]	rs9391806	chr6:30227370..30227387,+	p1@HLA-L, p2@HLA-L	0	0.09	0.635862	0.81
p6@PHC1 [rs3809218]			p6@PHC1 [rs3809218]	rs3809218	chr12:9066514..9066528,+	p6@PHC1, p1@PHC1	0	0.09	0.641251	0.81
p@chr5:74964235..74964256,+ [rs7715739, rs369034591]			p@chr5:74964235..74964256,+ [rs7715739, rs369034591]	rs7715739, rs369034591	chr5:74964235..74964256,+	p@chr5:74964235..74964256,+	0	0.09	0.660444	0.81
p@chr17:37405559..37405561,- [rs2061342]			p@chr17:37405559..37405561,- [rs2061342]	rs2061342	chr17:37405559..37405561,-	p@chr17:37405559..37405561,-	0	0.08	0.667937	0.81
p@chr2:28124429..28124474,+ [rs10177845]			p@chr2:28124429..28124474,+ [rs10177845]	rs2305929, rs10177845	chr2:28124429..28124474,+	p1@LOC100302650, p@chr2:28114209..28114224,+, enhancer@chr2:28124092-28124474, p@chr2:28124429..28124474,+	0	0.08	0.681215	0.81
enhancer@chr22:35708559-35708961 [rs138774]			enhancer@chr22:35708559-35708961 [rs138774]	rs138774	chr22:35708559-35708961	enhancer@chr22:35708559-35708961	0	0.08	0.699224	0.82
p@chr2:216286896..216286912,- [rs1250248]			p@chr2:216286896..216286912,- [rs1250248]	rs1250248	chr2:216286896..216286912,-	p@chr2:216286835..216286854,-, p@chr2:216286866..216286877,-, p@chr2:216286896..216286912,-, p@chr2:216286925..216286942,-, p@chr2:216286951..216286963,-	0	0.07	0.750099	0.87
p@chr2:135893438..135893485,+ [rs10445686]			p@chr2:135893438..135893485,+ [rs10445686]	rs10445686	chr2:135893438..135893485,+	p@chr2:135893438..135893485,+	0	0.06	0.769817	0.87
enhancer@chr17:37836315-37836462 [rs9303274]			enhancer@chr17:37836315-37836462 [rs9303274]	rs2941505, rs9303274	chr17:37836315-37836462	enhancer@chr17:37832582-37832871, enhancer@chr17:37836315-37836462	0	0.06	0.779414	0.87
		rs9303274:rs1053651 D'=0.91; rsquared=0.65. p@chr17:37822585..37822591,+ [rs1053651]	p@chr17:37822585..37822591,+ [rs1053651]	rs113612868, rs1053651	chr17:37822585..37822591,+	p1@TCAP, p@chr17:37822165..37822185,-, p@chr17:37822260..37822273,+, p@chr17:37822314..37822323,+, p@chr17:37822397..37822419,+, p@chr17:37822426..37822439,+, p@chr17:37822456..37822461,+, p@chr17:37822481..37822514,+, p@chr17:37822552..37822559,+, p@chr17:37822572..37822583,+, p@chr17:37822585..37822591,+	0	0.01	0.975943	0.99
enhancer@chr15:58712788-58712944 [rs11854624]			enhancer@chr15:58712788-58712944 [rs11854624]	rs11854624	chr15:58712788-58712944	enhancer@chr15:58712788-58712944	0	0.06	0.782437	0.87
		rs11854624:rs17821310 D'=1.0; rsquared=0.86. p1@LIPC [rs17821310]	p1@LIPC [rs17821310]	rs17821310	chr15:58702742..58702777,+	p1@LIPC	0	0.01	0.964375	0.99
enhancer@chr8:59311673-59312115 [rs1030431]			enhancer@chr8:59311673-59312115 [rs1030431]	rs1030431	chr8:59311673-59312115	enhancer@chr8:59311673-59312115	0	0.05	0.81609	0.9
p@chr20:34001017..34001019,- [rs6087704]			p@chr20:34001017..34001019,- [rs6087704]	rs6087704	chr20:34001017..34001019,-	p@chr20:34001017..34001019,-	0	0.05	0.819903	0.9
enhancer@chr11:61713558-61713889 [rs1534842]			enhancer@chr11:61713558-61713889 [rs1534842]	rs1534842	chr11:61713558-61713889	enhancer@chr11:61713558-61713889	0	0.04	0.846326	0.91
p1@GPR61 [rs552101]			p1@GPR61 [rs552101]	rs552101	chr1:110082487..110082535,+	p1@GPR61, p2@GPR61	0	0.04	0.847377	0.91
p@chr3:12704956..12704973,- [rs904453]			p@chr3:12704956..12704973,- [rs904453]	rs904453	chr3:12704956..12704973,-	p@chr3:12704956..12704973,-, p@chr3:12704990..12705013,-	0	0.04	0.859472	0.92
p2@CU690121 [rs12225230]			p2@CU690121 [rs12225230]	rs12225230	chr11:116728907..116728948,+	p2@CU690121	0	0.04	0.870777	0.92
enhancer@chr1:92668364-92668570 [rs3131816]			enhancer@chr1:92668364-92668570 [rs3131816]	rs3131816	chr1:92668364-92668570	enhancer@chr1:92668364-92668570	0	0.03	0.913369	0.96
p2@PACSIN1 [rs11758326]			p2@PACSIN1 [rs11758326]	rs11758326	chr6:34482630..34482655,+	p3@PACSIN1, p2@PACSIN1	0	0.01	0.952807	0.98
p1@ATXN2 [rs695871]			p1@ATXN2 [rs695871]	rs695871	chr12:112037077..112037130,-	p8@ATXN2, p6@ATXN2, p1@ATXN2	0	0	1	1
Triglycerides
Top promoter[SNPs in top promoter]		Linkage	Top promoter[SNPs in top promoter]	promoter snps in region	chosen promoter id	promoters	original p	Corrected coexpression score	raw p(perm)	FDR
p67@APOB [rs676210]			p67@APOB [rs676210]	rs1801695, rs1042034, rs676210, rs693, rs533617, rs673548, rs1367117	chr2:21231237..21231246,-	p@chr2:21224617..21224627,-, p@chr2:21224794..21224805,-, p@chr2:21224850..21224851,-, p@chr2:21224881..21224895,-, p@chr2:21224901..21224912,-, p@chr2:21224940..21224950,-, p@chr2:21224999..21225013,-, p@chr2:21225044..21225056,-, p44@APOB, p60@APOB, p3@APOB, p19@APOB, p67@APOB, p84@APOB, p35@APOB, p32@APOB, p20@APOB, p13@APOB, p5@APOB, p7@APOB, p2@BC172787, p5@BC172787, p1@BC172787, p3@BC172787…	0	0.63	0	0
p@chr2:165603346..165603357,- [rs10178921]			p@chr2:165603346..165603357,- [rs10178921]	rs10178921	chr2:165603346..165603357,-	p@chr2:165603312..165603317,-, p@chr2:165603346..165603357,-	0	0.56	0.000186532	0.01
p@chr2:27528919..27528940,+ [rs4665963]			p@chr2:27528919..27528940,+ [rs4665963]	rs4665963	chr2:27528919..27528940,+	p@chr2:27528919..27528940,+	0	0.53	0.000373065	0.01
		rs4665963:rs11684134 D'=0.8; rsquared=0.3. p1@LOC100505624 [rs11684134]	p1@LOC100505624 [rs11684134]	rs1275528, rs11608, rs181601000, rs71441063, rs13399758, rs113407226, rs62130714, rs1122227, rs11684134, rs6760828, rs76984581, rs62130724, rs7563162, rs780100	chr2:27558436..27558447,+	p17@SLC5A6, p3@SLC5A6, p1@SLC5A6, p5@CAD, p1@CAD, p2@CAD, p@chr2:27444648..27444652,+, p6@CAD, p1@SLC30A3, p2@SLC30A3, chr2:27485962..27485992,-, p@chr2:27486045..27486062,+, p@chr2:27486147..27486194,+, p@chr2:27532637..27532688,-, p@chr2:27532693..27532706,-, p@chr2:27532775..27532797,-, chr2:27544229..27544230,+, p20@GTF3C2, p2@LOC100505624, p1@LOC100505624, p5@GTF3C2, p1@ENST00000447070, p@ch…	0	0.42	0.00298452	0.02
p@chr7:73106975..73106980,+ [rs2293490]			p@chr7:73106975..73106980,+ [rs2293490]	rs1178979, rs2074754, rs35332062, rs55747707, rs1128349, rs2293490	chr7:73106975..73106980,+	p5@BAZ1B, p@chr7:72891445..72891467,-, p@chr7:72891534..72891567,-, p@chr7:72891569..72891580,-, p@chr7:72891699..72891721,-, p@chr7:72891817..72891855,-, chr7:73011960..73011982,+, enhancer@chr7:73037168-73037552, p1@AK303989, p1@DNAJC30, p1@WBSCR22, p@chr7:73106975..73106980,+	0	0.52	0.000373065	0.01
p32@ACSL5 [rs11195943]			p32@ACSL5 [rs11195943]	rs11195943	chr10:114154704..114154719,+	p32@ACSL5	0	0.51	0.000373065	0.01
p@chr11:116691448..116691464,- [rs5110, rs675]			p@chr11:116691448..116691464,- [rs5110, rs675]	rs651821, rs5110, rs675	chr11:116691448..116691464,-	p1@APOA5, p@chr11:116691448..116691464,-, p@chr11:116691490..116691522,-, p@chr11:116691672..116691682,-	0	0.5	0.000373065	0.01
p@chr19:45411878..45411884,- [rs7412]			p@chr19:45411878..45411884,- [rs7412]	rs405509, rs7412	chr19:45411878..45411884,-	p1@APOE, p@chr19:45411878..45411884,-, p@chr19:45412009..45412026,+, p3@AJ249921	0	0.5	0.000559597	0.01
p1@ZSWIM1 [rs3746497]			p1@ZSWIM1 [rs3746497]	rs3746497	chr20:44509857..44509880,+	chr20:44509839..44509853,+, p1@ZSWIM1	0	0.5	0.000559597	0.01
p@chr7:17287199..17287204,+ [rs6968554]			p@chr7:17287199..17287204,+ [rs6968554]	rs6968554	chr7:17287199..17287204,+	p@chr7:17287199..17287204,+, p@chr7:17287208..17287213,+, p@chr7:17287217..17287228,+, p@chr7:17287230..17287241,+, p@chr7:17287262..17287269,+	0	0.49	0.000559597	0.01
p@chr6:31254912..31254928,- [rs9468920]			p@chr6:31254912..31254928,- [rs9468920]	rs9468920	chr6:31254912..31254928,-	p@chr6:31254912..31254928,-	0	0.48	0.000559597	0.01
enhancer@chr7:72939749-72940060 [rs80189144]			enhancer@chr7:72939749-72940060 [rs80189144]	rs80189144	chr7:72939749-72940060	enhancer@chr7:72939749-72940060	0	0.48	0.000746129	0.01
p@chr12:124433988..124434017,- [rs2178663]			p@chr12:124433988..124434017,- [rs2178663]	rs2178663	chr12:124433988..124434017,-	p@chr12:124433988..124434017,-	0	0.46	0.00111919	0.01
p1@BAG6 [rs3117582]			p1@BAG6 [rs3117582]	rs2517546, rs3130980, rs3094216, rs3130982, rs1062470, rs3130559, rs1966, rs3869109, rs9264594, rs68037221, rs9264606, rs9264608, rs9264664, rs7767581, rs2074491, rs2524094, rs2844622, rs2074489, rs2844575, rs3099840, rs2523512, rs2523506, rs4645836, rs1800629, rs7769073, rs3132450, rs3117582, rs9267529, rs4569, rs1065356, rs376510, rs400547, rs3131383, rs3101018, rs3115671, rs660594, rs660550, r…	chr6:31620403..31620445,-	enhancer@chr6:31008975-31009347, p4@PSORS1C1, p2@PSORS1C1, p1@PSORS1C1, p3@PSORS1C1, p5@PSORS1C1, p@chr6:31083761..31083775,-, p@chr6:31083817..31083824,-, p@chr6:31083839..31083849,-, p@chr6:31083856..31083866,-, p@chr6:31084453..31084463,-, p@chr6:31084485..31084501,-, p@chr6:31097301..31097322,+, p2@PSORS1C2, p@chr6:31184194..31184242,+, p@chr6:31184444..31184457,+, p@chr6:31236747..31236823,-…	0	0.45	0.00130573	0.01
p@chr6:52617751..52617757,- [rs2180314]			p@chr6:52617751..52617757,- [rs2180314]	rs2180314	chr6:52617751..52617757,-	p@chr6:52617751..52617757,-	0	0.44	0.00149226	0.01
p@chr19:7184803..7184814,- [rs17253937]			p@chr19:7184803..7184814,- [rs17253937]	rs17253937	chr19:7184803..7184814,-	p@chr19:7184762..7184771,-, p@chr19:7184803..7184814,-, p@chr19:7184828..7184838,-	0	0.43	0.00242492	0.02
p1@ENST00000518619 [rs17149760]			p1@ENST00000518619 [rs17149760]	rs17149760	chr8:9183405..9183425,+	p1@ENST00000518619	0	0.42	0.00261145	0.02
p@chr20:44640866..44640875,- [rs3918256]			p@chr20:44640866..44640875,- [rs3918256]	rs378114, rs435306, rs11696196, rs56242234, rs13040272, rs3918253, rs2274755, rs17576, rs2236416, rs3918256, rs13925, rs20544	chr20:44640866..44640875,-	p@chr20:44538235..44538254,-, p@chr20:44574464..44574477,+, p@chr20:44574497..44574511,+, p@chr20:44574577..44574612,+, p@chr20:44574643..44574652,+, p@chr20:44574660..44574683,+, p@chr20:44574687..44574695,+, p@chr20:44627201..44627212,+, enhancer@chr20:44632907-44633142, p@chr20:44639404..44639426,+, p@chr20:44639498..44639509,+, p@chr20:44639584..44639604,+, p@chr20:44639616..44639619,+, p@chr…	0	0.4	0.00484984	0.03
p@chr4:88057279..88057283,+ [rs1408]			p@chr4:88057279..88057283,+ [rs1408]	rs11097127, rs236985, rs236984, rs1408, rs28571134	chr4:88057279..88057283,+	p@chr4:87990444..87990448,+, enhancer@chr4:88008599-88008816, p@chr4:88057279..88057283,+, p1@KLHL8, p2@KLHL8	0	0.4	0.00522291	0.03
		rs1408:rs3755980 D'=1.0; rsquared=0.14. p@chr4:88042092..88042099,- [rs3755980]	p@chr4:88042092..88042099,- [rs3755980]	rs3755980	chr4:88042092..88042099,-	p@chr4:88042092..88042099,-	0	0.18	0.270845	0.45
p1@ENST00000448198, p1@ENST00000455328 [rs3916765]			p1@ENST00000448198, p1@ENST00000455328 [rs3916765]	rs3916765	chr6:32685788..32685800,+	p1@ENST00000448198,p1@ENST00000455328	0	0.38	0.0100727	0.05
enhancer@chr19:19483893-19484092 [rs59148799]			enhancer@chr19:19483893-19484092 [rs59148799]	rs2074296, rs67215661, rs12460764, rs59148799, rs12973258, rs17288409, rs7250658, rs73004933	chr19:19483893-19484092	p4@HAPLN4, p2@HAPLN4, p5@HAPLN4, p1@SUGP1, p1@MAU2, p@chr19:19431888..19431912,-, enhancer@chr19:19483893-19484092, enhancer@chr19:19488658-19488936, chr19:19488822..19488846,+, enhancer@chr19:19504149-19504345, p1@LOC100128429, p@chr19:19675738..19675742,-	0	0.37	0.0108189	0.05
p1@NSUN5 [rs1880948]			p1@NSUN5 [rs1880948]	rs1880948	chr7:72722783..72722837,-	p1@NSUN5	0	0.37	0.0110054	0.05
chr6:30798448..30798455,- [rs1264347]			chr6:30798448..30798455,- [rs1264347]	rs9262143, rs3095340, rs1264350, rs1264347	chr6:30798448..30798455,-	p8@PPP1R18, p13@PPP1R18, p2@PPP1R18, p16@PPP1R18, p@chr6:30652686..30652705,+, enhancer@chr6:30726704-30727354, enhancer@chr6:30796195-30796565, p1@LINC00243, p2@LINC00243, chr6:30798448..30798455,-	0	0.37	0.0113785	0.05
		rs1264347:rs886422 D'=1.0; rsquared=1.0. p23@DDR1 [rs886422]	p23@DDR1 [rs886422]	rs886422	chr6:30864435..30864457,+	p23@DDR1	0	0.05	0.762731	0.82
p2@LIPC [rs2070895]			p2@LIPC [rs2070895]	rs2070895	chr15:58724184..58724197,+	p3@LIPC, p2@LIPC	0	0.37	0.0134303	0.05
p@chr19:45487536..45487571,+ [rs16979600]			p@chr19:45487536..45487571,+ [rs16979600]	rs1531517, rs3852857, rs16979600	chr19:45487536..45487571,+	enhancer@chr19:45242034-45242469, p@chr19:45242084..45242119,-, p@chr19:45242401..45242412,+, p@chr19:45242420..45242462,+, enhancer@chr19:45373382-45373614, p@chr19:45487536..45487571,+, p@chr19:45487573..45487606,+, p@chr19:45487650..45487661,+	0	0.36	0.0147361	0.06
		rs16979600:rs3760629 D'=1.0; rsquared=0.05. p3@CLPTM1 [rs3760629]	p3@CLPTM1 [rs3760629]	rs1135062, rs3760629	chr19:45458237..45458260,+	p@chr19:45322971..45322990,+, p@chr19:45323016..45323031,+, p@chr19:45458158..45458217,-, p3@CLPTM1, p4@CLPTM1	0	0.13	0.457004	0.61
p2@LY6G6C [rs805292]			p2@LY6G6C [rs805292]	rs805292	chr6:31689797..31689829,-	p2@LY6G6C	0	0.36	0.0160418	0.06
p@chr4:87873088..87873092,+ [rs1992876]			p@chr4:87873088..87873092,+ [rs1992876]	rs1992876	chr4:87873088..87873092,+	p@chr4:87873088..87873092,+	0	0.35	0.0182802	0.07
p@chr8:19782798..19782817,- [rs28522139]			p@chr8:19782798..19782817,- [rs28522139]	rs28522139, rs1800590, rs3779787, rs1534649, rs1801177, rs73667469, rs343, rs303, rs3289, rs1059507, rs3735964, rs3200218	chr8:19782798..19782817,-	p@chr8:19782798..19782817,-, p1@LPL, p2@LPL, p3@LPL, enhancer@chr8:19797796-19798054, enhancer@chr8:19799323-19799727, p@chr8:19799565..19799589,-, chr8:19805701..19805712,+, p@chr8:19805739..19805766,-, p@chr8:19805751..19805767,+, chr8:19810816..19810835,+, chr8:19817317..19817319,+, p@chr8:19823146..19823158,+, p@chr8:19823393..19823436,+, chr8:19824080..19824096,+, chr8:19824121..19824133,+	0	0.34	0.0223839	0.08
p@chr8:11396776..11396795,+ [rs2409784]			p@chr8:11396776..11396795,+ [rs2409784]	rs1382567, rs2409784	chr8:11396776..11396795,+	p@chr8:11350850..11350859,+, p10@BLK, p@chr8:11396776..11396795,+	0	0.33	0.0272337	0.09
chr2:28203328..28203338,+ [rs898031]			chr2:28203328..28203338,+ [rs898031]	rs898031	chr2:28203328..28203338,+	p@chr2:28203275..28203307,+, chr2:28203328..28203338,+, p@chr2:28203353..28203364,+	0	0.33	0.028726	0.09
		rs898031:rs2305929 D'=1.0; rsquared=0.1. p@chr2:28114209..28114224,+ [rs2305929]	p@chr2:28114209..28114224,+ [rs2305929]	rs78911608, rs2305929, rs10177845	chr2:28114209..28114224,+	p11@BRE, p1@LOC100302650, p@chr2:28114209..28114224,+, enhancer@chr2:28124092-28124474, p@chr2:28124429..28124474,+	0	0.1	0.549151	0.68
p1@HAX1 [rs11556341]			p1@HAX1 [rs11556341]	rs11556341	chr1:154245073..154245147,+	p1@HAX1	0	0.33	0.034322	0.11
		same SNP, different promoter: p@chr1:154244875..154244901,- [rs11556341]	p@chr1:154244875..154244901,- [rs11556341]	rs11556341	chr1:154244875..154244901,-	p@chr1:154244875..154244901,-	0	0.14	0.415221	0.61
p@chr2:28634997..28635008,+ [rs12624279]			p@chr2:28634997..28635008,+ [rs12624279]	rs144417401, rs9309662, rs7606480, rs12624279	chr2:28634997..28635008,+	p@chr2:28628940..28628943,+, enhancer@chr2:28629645-28630316, enhancer@chr2:28632075-28632521, p@chr2:28632148..28632162,-, p@chr2:28634997..28635008,+	0	0.32	0.0348816	0.11
p1@ZNF646 [rs2303222]			p1@ZNF646 [rs2303222]	rs2303222, rs9925964, rs1978487	chr16:31085714..31085783,+	p1@ZNF668, p1@ZNF646, enhancer@chr16:31129616-31130225	0	0.32	0.0371199	0.11
p2@F2 [rs2070852]			p2@F2 [rs2070852]	rs2070852	chr11:46745010..46745020,+	p2@F2	0	0.3	0.0539079	0.15
		rs2070852:rs7932354 D'=1.0; rsquared=1.0. p1@ARHGAP1 [rs7932354]	p1@ARHGAP1 [rs7932354]	rs7932354	chr11:46722117..46722183,-	p1@ARHGAP1, p3@ARHGAP1	0	0.13	0.437045	0.61
enhancer@chr15:58712788-58712944 [rs11854624]			enhancer@chr15:58712788-58712944 [rs11854624]	rs11854624	chr15:58712788-58712944	enhancer@chr15:58712788-58712944	0	0.3	0.0581981	0.16
		rs11854624:rs17821310 D'=1.0; rsquared=0.86. p1@LIPC [rs17821310]	p1@LIPC [rs17821310]	rs17821310	chr15:58702742..58702777,+	p1@LIPC	0	0.1	0.544861	0.68
p1@ENST00000519197 [rs28597716]			p1@ENST00000519197 [rs28597716]	rs28597716, rs11204085	chr8:19936740..19936760,+	p3@ENST00000519197, p1@ENST00000519197, p2@ENST00000519197, enhancer@chr8:19940572-19940865	0	0.29	0.0678978	0.18
enhancer@chr11:47109490-47109615 [rs4319472]			enhancer@chr11:47109490-47109615 [rs4319472]	rs4319472, rs747650	chr11:47109490-47109615	enhancer@chr11:47109490-47109615, p@chr11:47109565..47109602,-, p3@C11orf49	0	0.28	0.0759187	0.2
p1@NAT2 [rs4646246]			p1@NAT2 [rs4646246]	rs4646246	chr8:18248786..18248805,+	p2@NAT2, p1@NAT2	0	0.28	0.0830069	0.21
enhancer@chr16:56985400-56985562 [rs72786786, rs12448528]			enhancer@chr16:56985400-56985562 [rs72786786, rs12448528]	rs72786786, rs12448528	chr16:56985400-56985562	enhancer@chr16:56985400-56985562	0	0.27	0.0925201	0.23
p@chr6:33153425..33153432,- [rs9277934]			p@chr6:33153425..33153432,- [rs9277934]	rs9277934	chr6:33153425..33153432,-	p@chr6:33153425..33153432,-	0	0.27	0.0941988	0.23
		rs9277934:rs2076311 D'=1.0; rsquared=1.0. p@chr6:33145331..33145378,- [rs2076311]	p@chr6:33145331..33145378,- [rs2076311]	rs2076311, rs9277934	chr6:33145331..33145378,-	p@chr6:33145331..33145378,-, chr6:33153519..33153559,-	0	0.07	0.699496	0.79
enhancer@chr8:11032163-11032532 [rs6986032]			enhancer@chr8:11032163-11032532 [rs6986032]	rs6986032	chr8:11032163-11032532	enhancer@chr8:11032163-11032532	0	0.27	0.0975564	0.23
p@chr1:62928606..62928608,+ [rs998403]			p@chr1:62928606..62928608,+ [rs998403]	rs631106, rs646179, rs998403, rs1305521	chr1:62928606..62928608,+	p4@USP1, p1@USP1, p11@USP1, p23@USP1, enhancer@chr1:62928310-62928608, p@chr1:62928606..62928608,+, enhancer@chr1:62948948-62949316	0	0.27	0.100354	0.23
p@chr1:63112277..63112278,+ [rs1168085]			p@chr1:63112277..63112278,+ [rs1168085]	rs1168085	chr1:63112277..63112278,+	p@chr1:63112277..63112278,+	0	0.26	0.103152	0.23
p@chr6:32411003..32411021,- [rs3135391]			p@chr6:32411003..32411021,- [rs3135391]	rs3135391, rs3135388	chr6:32411003..32411021,-	p4@HLA-DQA1, p@chr6:32411003..32411021,-, p@chr6:32411062..32411086,-, p3@HLA-DQA1, p6@HLA-DQA1, p10@HLA-DQA1, p@chr6:32412808..32412821,-	0	0.26	0.114531	0.25
p11@SIDT2 [rs474339]			p11@SIDT2 [rs474339]	rs4938354, rs474339	chr11:117059709..117059733,+	enhancer@chr11:117050933-117051273, p11@SIDT2	0	0.25	0.120686	0.26
		rs474339:rs10892074 D'=1.0; rsquared=0.25. p@chr11:116980715..116980720,- [rs10892074]	p@chr11:116980715..116980720,- [rs10892074]	rs10892074	chr11:116980715..116980720,-	p@chr11:116980715..116980720,-	0	0.14	0.419698	0.61
		rs474339:rs508487 D'=1.0; rsquared=0.37. p@chr11:117075245..117075293,- [rs508487]	p@chr11:117075245..117075293,- [rs508487]	rs664971, rs641620, rs2269397, rs508487	chr11:117075245..117075293,-	p4@TAGLN, p@chr11:117074100..117074165,+, chr11:117074489..117074503,+, chr11:117074504..117074555,+, p@chr11:117075245..117075293,-	0	0.05	0.758068	0.82
p@chr19:19640431..19640450,+ [rs4808967]			p@chr19:19640431..19640450,+ [rs4808967]	rs4808967	chr19:19640431..19640450,+	p@chr19:19640431..19640450,+, p@chr19:19640454..19640461,+	0	0.24	0.141392	0.3
		rs4808967:rs1063966 D'=1.0; rsquared=1.0. p@chr19:19616795..19616800,+ [rs1063966]	p@chr19:19616795..19616800,+ [rs1063966]	rs1063966	chr19:19616795..19616800,+	p@chr19:19616795..19616800,+	0	0.17	0.299011	0.48
p@chr8:19830089..19830095,+ [rs1569209]			p@chr8:19830089..19830095,+ [rs1569209]	rs1569209	chr8:19830089..19830095,+	p@chr8:19830089..19830095,+	0	0.24	0.149785	0.31
p1@TIMD4 [rs6882076]			p1@TIMD4 [rs6882076]	rs6882076	chr5:156390230..156390246,-	p1@TIMD4	0	0.23	0.155755	0.31
enhancer@chr11:116722234-116722744 [rs689243]			enhancer@chr11:116722234-116722744 [rs689243]	rs689243, rs2080586, rs11216164	chr11:116722234-116722744	enhancer@chr11:116722234-116722744, p@chr11:116733003..116733018,-, p@chr11:116734451..116734464,-	0	0.23	0.163962	0.32
p@chr11:47303410..47303414,+ [rs326217]			p@chr11:47303410..47303414,+ [rs326217]	rs1449627, rs326217	chr11:47303410..47303414,+	p3@MADD, p2@MADD, p@chr11:47303410..47303414,+	0	0.22	0.17646	0.34
p@chr8:126442070..126442090,- [rs4871594]			p@chr8:126442070..126442090,- [rs4871594]	rs4871594, rs2980874, rs2385114, rs2235108, rs17405319, rs72647352	chr8:126442070..126442090,-	p@chr8:126442070..126442090,-, p@chr8:126444674..126444689,-, p19@TRIB1, p15@TRIB1, enhancer@chr8:126446642-126447323, p@chr8:126447258..126447275,+, p14@TRIB1, p9@TRIB1, p12@TRIB1, enhancer@chr8:126452500-126452812	0	0.21	0.193807	0.37
p@chr2:27975692..27975750,+ [rs6547796]			p@chr2:27975692..27975750,+ [rs6547796]	rs62138962, rs12615690, rs3749147, rs4666009, rs115386260, rs62139017, rs6547796, rs13013484	chr2:27975692..27975750,+	chr2:27811391..27811432,+, p2@GPN1, p3@CCDC121, p1@CCDC121, p1@GPN1, p@chr2:27858182..27858185,+, p@chr2:27938986..27938991,+, enhancer@chr2:27960575-27961156, p@chr2:27975692..27975750,+, enhancer@chr2:27988549-27989353, p@chr2:27988549..27988557,-	0	0.21	0.199217	0.37
p@chr1:63266602..63266609,- [rs11208033, rs10493328, rs4409690]			p@chr1:63266602..63266609,- [rs11208033, rs10493328, rs4409690]	rs11208033, rs10493328, rs4409690	chr1:63266602..63266609,-	p@chr1:63266602..63266609,-	0	0.21	0.19959	0.37
		rs11208033:rs12122434 D'=1.0; rsquared=0.22. p@chr1:63261897..63261900,+ [rs12122434]; rs10493328:rs12122434 D'=1.0; rsquared=0.22. p@chr1:63261897..63261900,+ [rs12122434]; rs4409690:rs12122434 D'=1.0; rsquared=0.22. p@chr1:63261897..63261900,+ [rs12122434]	p@chr1:63261897..63261900,+ [rs12122434]	rs12122434	chr1:63261897..63261900,+	p@chr1:63261897..63261900,+	0	0.19	0.243052	0.42
p3@FADS2 [rs968567]			p3@FADS2 [rs968567]	rs2269928, rs509360, rs174538, rs174548, rs174549, rs174550, rs174561, rs968567, rs2072114, rs482548	chr11:61595572..61595584,+	p@chr11:61537818..61537845,+, chr11:61548480..61548492,+, p1@C11orf10, p1@FEN1, p14@FADS1, p7@FADS1, p@chr11:61582877..61582920,+, p6@FADS2, p3@FADS2, p1@FADS2, p@chr11:61605283..61605303,+, chr11:61633276..61633310,+, chr11:61633313..61633337,+	0	0.2	0.231673	0.42
chr6:31808499..31808514,+ [rs599707]			chr6:31808499..31808514,+ [rs599707]	rs599707	chr6:31808499..31808514,+	chr6:31808499..31808514,+	0	0.19	0.243425	0.42
enhancer@chr10:65274637-65275000 [rs10761779]			enhancer@chr10:65274637-65275000 [rs10761779]	rs10761779	chr10:65274637-65275000	enhancer@chr10:65274637-65275000	0	0.19	0.266928	0.45
chr6:160770176..160770186,- [rs474513, rs539298]			chr6:160770176..160770186,- [rs474513, rs539298]	rs474513, rs539298, rs3105749	chr6:160770176..160770186,-	chr6:160770176..160770186,-, p@chr6:160821141..160821145,+	0	0.18	0.293602	0.48
enhancer@chr6:32913033-32913520 [rs1480380]			enhancer@chr6:32913033-32913520 [rs1480380]	rs1480380	chr6:32913033-32913520	enhancer@chr6:32913033-32913520	0	0.16	0.334079	0.52
enhancer@chr2:227020272-227020467 [rs13404263]			enhancer@chr2:227020272-227020467 [rs13404263]	rs13404263	chr2:227020272-227020467	enhancer@chr2:227020272-227020467	0	0.16	0.335385	0.52
p1@HLA-DQB1 [rs3891175]			p1@HLA-DQB1 [rs3891175]	rs3129763, rs3891175	chr6:32634425..32634479,-	enhancer@chr6:32590770-32591146, p@chr6:32590879..32590905,-, p1@HLA-DQB1	0	0.15	0.363925	0.56
enhancer@chr3:52531917-52532418 [rs13326165]			enhancer@chr3:52531917-52532418 [rs13326165]	rs13326165	chr3:52531917-52532418	enhancer@chr3:52531917-52532418	0	0.15	0.389293	0.59
p9@IFT172 [rs780104, rs79740025, rs6734392]			p9@IFT172 [rs780104, rs79740025, rs6734392]	rs780104, rs79740025, rs6734392	chr2:27677742..27677746,-	p9@IFT172	0	0.13	0.443014	0.61
p@chr10:65121474..65121480,- [rs12355784]			p@chr10:65121474..65121480,- [rs12355784]	rs12355784	chr10:65121474..65121480,-	p@chr10:65121474..65121480,-	0	0.13	0.443574	0.61
enhancer@chr1:230279464-230279771 [rs4846905]			enhancer@chr1:230279464-230279771 [rs4846905]	rs4846905	chr1:230279464-230279771	enhancer@chr1:230279464-230279771	0	0.13	0.44432	0.61
		rs4846905:rs7551742 D'=0.93; rsquared=0.83. enhancer@chr1:230289705-230290142 [rs7551742]	enhancer@chr1:230289705-230290142 [rs7551742]	rs7551742	chr1:230289705-230290142	enhancer@chr1:230289705-230290142	0	0.08	0.642791	0.77
enhancer@chr2:28319174-28319559 [rs7568903]			enhancer@chr2:28319174-28319559 [rs7568903]	rs7568903	chr2:28319174-28319559	enhancer@chr2:28319174-28319559	0	0.13	0.449356	0.61
chr6:32148013..32148032,+ [rs3134943]			chr6:32148013..32148032,+ [rs3134943]	rs3134943	chr6:32148013..32148032,+	chr6:32148013..32148032,+	0	0.13	0.45775	0.61
		rs3134943:rs3134931 D'=1.0; rsquared=0.08. p@chr6:32190527..32190536,- [rs3134931]	p@chr6:32190527..32190536,- [rs3134931]	rs3134931	chr6:32190527..32190536,-	p@chr6:32190527..32190536,-	0	0.07	0.677112	0.79
		rs3134943:rs3131283 D'=1.0; rsquared=0.92. p3@PRRT1 [rs3131283]	p3@PRRT1 [rs3131283]	rs1150754, rs3131283	chr6:32119877..32119936,-	enhancer@chr6:32050642-32051035, p1@PRRT1, p3@PRRT1	0	0.03	0.849655	0.88
p3@CPEB4 [rs55946741]			p3@CPEB4 [rs55946741]	rs55946741	chr5:173345188..173345213,+	p3@CPEB4, p4@CPEB4	0	0.11	0.511658	0.67
p1@ENST00000451079 [rs12442297]			p1@ENST00000451079 [rs12442297]	rs12442297	chr15:44168470..44168473,-	p1@ENST00000451079	0	0.11	0.526954	0.68
p@chr16:72108093..72108100,+ [rs2000999]			p@chr16:72108093..72108100,+ [rs2000999]	rs2000999	chr16:72108093..72108100,+	p@chr16:72108070..72108089,+, p@chr16:72108093..72108100,+, p@chr16:72108103..72108121,+	0	0.11	0.534975	0.68
enhancer@chr8:19518773-19518959 [rs4921664]			enhancer@chr8:19518773-19518959 [rs4921664]	rs4921664	chr8:19518773-19518959	enhancer@chr8:19518773-19518959	0	0.09	0.600634	0.74
		rs4921664:rs7001715 D'=1.0; rsquared=0.66. p@chr8:19507328..19507329,- [rs7001715]	p@chr8:19507328..19507329,- [rs7001715]	rs7001715	chr8:19507328..19507329,-	p@chr8:19507328..19507329,-	0	0.05	0.759	0.82
p@chr22:38572651..38572665,+ [rs133017]			p@chr22:38572651..38572665,+ [rs133017]	rs2413503, rs133017	chr22:38572651..38572665,+	enhancer@chr22:38568765-38569142, enhancer@chr22:38572177-38572681, p@chr22:38572651..38572665,+	0	0.08	0.641298	0.77
p@chr16:81610493..81610521,+ [rs11642655]			p@chr16:81610493..81610521,+ [rs11642655]	rs11642655	chr16:81610493..81610521,+	p@chr16:81610493..81610521,+	0	0.07	0.673195	0.79
enhancer@chr8:59311673-59312115 [rs1030431]			enhancer@chr8:59311673-59312115 [rs1030431]	rs1030431	chr8:59311673-59312115	enhancer@chr8:59311673-59312115	0	0.07	0.693154	0.79
enhancer@chr15:44289112-44289501 [rs6493092]			enhancer@chr15:44289112-44289501 [rs6493092]	rs6493092, rs8041487	chr15:44289112-44289501	enhancer@chr15:44289112-44289501, enhancer@chr15:44319631-44319819	0	0.07	0.701548	0.79
enhancer@chr3:170695585-170695919 [rs7635100]			enhancer@chr3:170695585-170695919 [rs7635100]	rs7635100	chr3:170695585-170695919	enhancer@chr3:170695585-170695919	0	0.05	0.764223	0.82
enhancer@chr11:61746281-61746413 [rs10792320]			enhancer@chr11:61746281-61746413 [rs10792320]	rs10792320	chr11:61746281-61746413	enhancer@chr11:61746281-61746413	0	0.05	0.777094	0.83
p@chr2:28524175..28524215,+ [rs12621972]			p@chr2:28524175..28524215,+ [rs12621972]	rs12621972	chr2:28524175..28524215,+	p@chr2:28524175..28524215,+	0	0.04	0.812908	0.86
enhancer@chr6:127481688-127482073 [rs9491700]			enhancer@chr6:127481688-127482073 [rs9491700]	rs9491700	chr6:127481688-127482073	enhancer@chr6:127481688-127482073	0	0.04	0.82354	0.86
enhancer@chr2:227172292-227172683 [rs2713556]			enhancer@chr2:227172292-227172683 [rs2713556]	rs2713556	chr2:227172292-227172683	enhancer@chr2:227172292-227172683	0	0.02	0.892744	0.91
enhancer@chr15:44431053-44431468 [rs2555389]			enhancer@chr15:44431053-44431468 [rs2555389]	rs2555389	chr15:44431053-44431468	enhancer@chr15:44431053-44431468	0	0.01	0.933968	0.94
p8@MAPK10 [rs2869433]			p8@MAPK10 [rs2869433]	rs2869433	chr4:87278886..87278898,-	p8@MAPK10	0	0	1	1
Crohn's disease
Top promoter[SNPs in top promoter]		Linkage	Top promoter[SNPs in top promoter]	promoter snps in region	chosen promoter id	promoters	original p	Corrected coexpression score	raw p(perm)	FDR
p@chr5:131820136..131820148,- [rs2070727]			p@chr5:131820136..131820148,- [rs2070727]	rs274548, rs2548993, rs2070727	chr5:131820136..131820148,-	p@chr5:131730919..131730923,+, p1@ENST00000443093, p@chr5:131820136..131820148,-	0	0.68	0	0
enhancer@chr2:61112067-61112568 [rs6545835]			enhancer@chr2:61112067-61112568 [rs6545835]	rs6545835, rs10185028	chr2:61112067-61112568	enhancer@chr2:61112067-61112568, p1@AB464350	0	0.62	0	0
p@chr1:67896878..67896883,+ [rs3762313, rs3762314]			p@chr1:67896878..67896883,+ [rs3762313, rs3762314]	rs3762313, rs3762314	chr1:67896878..67896883,+	p@chr1:67896878..67896883,+	0	0.61	0	0
enhancer@chr5:40486540-40486993 [rs7720838]			enhancer@chr5:40486540-40486993 [rs7720838]	rs11742570, rs6451494, rs1545334, rs4957300, rs7720838, rs10440635, rs9283753, rs10941516	chr5:40486540-40486993	enhancer@chr5:40410103-40410947, p@chr5:40410378..40410401,-, p@chr5:40410410..40410423,-, p@chr5:40410427..40410436,-, p@chr5:40410450..40410478,-, p@chr5:40410557..40410561,+, enhancer@chr5:40411118-40411409, p@chr5:40411307..40411326,+, enhancer@chr5:40430020-40430156, p@chr5:40463662..40463667,+, enhancer@chr5:40486540-40486993, p@chr5:40486577..40486605,-, enhancer@chr5:40490442-40491221, p@…	0	0.57	0	0
p4@TAP2 [rs241448, rs241447, rs241452, rs17034, rs241451, rs241449]			p4@TAP2 [rs241448, rs241447, rs241452, rs17034, rs241451, rs241449]	rs9469220, rs2071551, rs7768538, rs2071469, rs241448, rs241447, rs241452, rs17034, rs241451, rs241449	chr6:32796444..32796464,-	p@chr6:32658073..32658091,-, p1@M95729, p3@M95729, p2@M95729, p1@HLA-DOB, p2@HLA-DOB, p3@HLA-DOB, p4@TAP2	0	0.55	0	0
enhancer@chr22:30591785-30593544 [rs713875]			enhancer@chr22:30591785-30593544 [rs713875]	rs714027, rs713875	chr22:30591785-30593544	enhancer@chr22:30577606-30578240, enhancer@chr22:30591785-30593544, p@chr22:30592512..30592515,+, chr22:30592541..30592552,+, p@chr22:30592605..30592610,+	0	0.52	0	0
p@chr6:31240851..31240879,- [rs7759127]			p@chr6:31240851..31240879,- [rs7759127]	rs1049853, rs7759127	chr6:31240851..31240879,-	p@chr6:31236747..31236823,-, enhancer@chr6:31240851-31241006, p@chr6:31240851..31240879,-	0	0.52	0	0
p@chr10:35484899..35484906,- [rs1057108]			p@chr10:35484899..35484906,- [rs1057108]	rs12761675, rs1057108, rs17591857, rs12242110	chr10:35484899..35484906,-	enhancer@chr10:35438214-35438795, p2@CREM, p@chr10:35484899..35484906,-, p15@CREM, enhancer@chr10:35498991-35499412, p5@CCNY	0	0.49	0	0
p@chr17:32635480..32635483,- [rs16969454]			p@chr17:32635480..32635483,- [rs16969454]	rs1860190, rs1024611, rs4586, rs16969454	chr17:32635480..32635483,-	enhancer@chr17:32576443-32576937, p@chr17:32576606..32576634,-, p@chr17:32576792..32576804,+, p@chr17:32576831..32576849,+, enhancer@chr17:32579434-32580053, p@chr17:32579618..32579631,-, p@chr17:32579871..32579887,+, p@chr17:32579919..32579930,+, p2@CCL2, p@chr17:32583293..32583323,-, chr17:32583408..32583421,+, enhancer@chr17:32635447-32635773, p@chr17:32635480..32635483,-, p@chr17:32635485..32…	0	0.48	0	0
p@chr17:37970009..37970013,- [rs9909593]			p@chr17:37970009..37970013,- [rs9909593]	rs907091, rs907092, rs9909593, rs12936231	chr17:37970009..37970013,-	p@chr17:37921587..37921593,-, p@chr17:37922281..37922314,-, enhancer@chr17:37969952-37970167, p@chr17:37970009..37970013,-, p@chr17:38029166..38029196,+	0	0.46	0	0
enhancer@chr15:67468171-67468380 [rs17294280]			enhancer@chr15:67468171-67468380 [rs17294280]	rs17293632, rs17294280	chr15:67468171-67468380	enhancer@chr15:67442347-67443164, p@chr15:67442515..67442533,-, p@chr15:67442542..67442554,-, enhancer@chr15:67468171-67468380	0	0.44	0	0
enhancer@chr14:88472465-88473193 [rs8005161]			enhancer@chr14:88472465-88473193 [rs8005161]	rs8005161	chr14:88472465-88473193	enhancer@chr14:88472465-88473193	0	0.43	0.000328084	0
enhancer@chr10:82253401-82253904 [rs7900536]			enhancer@chr10:82253401-82253904 [rs7900536]	rs7900536	chr10:82253401-82253904	enhancer@chr10:82253401-82253904	0	0.41	0.000984252	0
p1@DAP3 [rs1058207]			p1@DAP3 [rs1058207]	rs1058207	chr1:155658865..155658889,+	p3@YY1AP1, p1@DAP3	0	0.41	0.000984252	0
p@chr6:32405128..32405175,- [rs3135395]			p@chr6:32405128..32405175,- [rs3135395]	rs3135395, rs3129883	chr6:32405128..32405175,-	enhancer@chr6:32405012-32405514, p@chr6:32405128..32405175,-, p@chr6:32405184..32405194,-, p@chr6:32405482..32405514,+, p3@HLA-DRA, p5@HLA-DRA, p2@HLA-DRA, p6@HLA-DRA	0	0.41	0.00131234	0.01
p1@RPL37 [rs10065570]			p1@RPL37 [rs10065570]	rs10065570	chr5:40835303..40835335,-	p1@RPL37	0	0.38	0.0019685	0.01
enhancer@chr21:45627966-45628150 [rs2838522]			enhancer@chr21:45627966-45628150 [rs2838522]	rs2838522	chr21:45627966-45628150	enhancer@chr21:45627966-45628150	0	0.38	0.00229659	0.01
p@chr14:69261497..69261515,+ [rs2236262]			p@chr14:69261497..69261515,+ [rs2236262]	rs2236262, rs10873217	chr14:69261497..69261515,+	p5@ZFP36L1, p@chr14:69261497..69261515,+, enhancer@chr14:69301401-69301774	0	0.34	0.00459318	0.02
p@chr2:43521231..43521252,+ [rs1322]			p@chr2:43521231..43521252,+ [rs1322]	rs1322	chr2:43521231..43521252,+	p@chr2:43520885..43520897,-, p@chr2:43521231..43521252,+	0	0.34	0.00688976	0.03
p8@LNPEP [rs2351010]			p8@LNPEP [rs2351010]	rs1363974, rs2351010	chr5:96294145..96294180,+	p10@LNPEP, p21@LNPEP, p15@LNPEP, p8@LNPEP	0	0.32	0.00885827	0.03
p1@C6orf48 [rs9368699]			p1@C6orf48 [rs9368699]	rs9368699	chr6:31802687..31802705,+	chr6:31802314..31802346,-, p1@C6orf48	0	0.32	0.00918635	0.03
enhancer@chr1:206939730-206940044 [rs3024505]			enhancer@chr1:206939730-206940044 [rs3024505]	rs3024505	chr1:206939730-206940044	enhancer@chr1:206939730-206940044, p@chr1:206940013..206940044,+	0	0.32	0.00918635	0.03
p3@CISD1 [rs2790189]			p3@CISD1 [rs2790189]	rs2251039, rs2790189	chr10:60042657..60042682,+	p2@CISD1, p1@CISD1, p3@CISD1	0	0.31	0.0134514	0.04
p@chr2:102931037..102931044,+ [rs12712135]			p@chr2:102931037..102931044,+ [rs12712135]	rs12712135, rs17026974, rs1420101, rs12905	chr2:102931037..102931044,+	p@chr2:102931017..102931024,+, p@chr2:102931037..102931044,+, p@chr2:102931045..102931058,+, enhancer@chr2:102952325-102952611, chr2:102957643..102957647,+, p@chr2:102960064..102960089,+	0	0.29	0.0275591	0.08
p@chr20:62366061..62366072,+ [rs2427533]			p@chr20:62366061..62366072,+ [rs2427533]	rs2427533	chr20:62366061..62366072,+	p5@ZGPAT, p8@ZGPAT, p@chr20:62366022..62366027,+, p@chr20:62366029..62366032,+, p@chr20:62366043..62366057,+, p@chr20:62366061..62366072,+, p@chr20:62366083..62366102,+	0	0.28	0.0318241	0.09
p@chr10:64397428..64397447,- [rs16917546, rs10761652]			p@chr10:64397428..64397447,- [rs16917546, rs10761652]	rs16917546, rs10761652, rs12766391, rs10761659	chr10:64397428..64397447,-	p@chr10:64397428..64397447,-, enhancer@chr10:64441011-64441399, p@chr10:64441325..64441347,+, enhancer@chr10:64445329-64445644	0	0.27	0.0334646	0.09
p4@CD244 [rs12036607, rs7410867, rs12036670]			p4@CD244 [rs12036607, rs7410867, rs12036670]	rs12036607, rs7410867, rs12036670	chr1:160832568..160832579,-	p2@CD244, p4@CD244, p3@CD244, p5@CD244, p1@CD244	0	0.26	0.0479003	0.12
p@chr1:7886661..7886674,+ [rs697693]			p@chr1:7886661..7886674,+ [rs697693]	rs697693, rs2640908	chr1:7886661..7886674,+	p@chr1:7886629..7886648,+, p@chr1:7886661..7886674,+, chr1:7889877..7889927,+	0	0.23	0.0826772	0.2
p21@SEC16A [rs3812591]			p21@SEC16A [rs3812591]	rs3812591	chr9:139341675..139341679,-	p21@SEC16A	0	0.23	0.0846457	0.2
		rs3812591:rs3812584 D'=1.0; rsquared=0.38. p3@PMPCA [rs3812584]	p3@PMPCA [rs3812584]	rs3812584	chr9:139313013..139313034,+	p4@PMPCA, p3@PMPCA	0	0.17	0.222769	0.36
p@chr10:81053715..81053725,+ [rs1250560, rs1250559]			p@chr10:81053715..81053725,+ [rs1250560, rs1250559]	rs1250559, rs1250560, rs1250552	chr10:81053715..81053725,+	p@chr10:81053629..81053644,-, p@chr10:81053715..81053725,+, p@chr10:81053775..81053786,+, p@chr10:81053827..81053838,+, p@chr10:81058206..81058225,+	0	0.23	0.0958005	0.22
enhancer@chr2:43745392-43745589 [rs10189235]			enhancer@chr2:43745392-43745589 [rs10189235]	rs7570242, rs10189235	chr2:43745392-43745589	enhancer@chr2:43705862-43706134, enhancer@chr2:43745392-43745589	0	0.22	0.106955	0.23
p1@RNU86 [rs12484030]			p1@RNU86 [rs12484030]	rs12484030	chr22:39712867..39712899,-	p1@RNU86	0	0.22	0.108596	0.23
p1@AK131570 [rs9252]			p1@AK131570 [rs9252]	rs9252	chr17:40554672..40554683,-	p1@AK131570	0	0.22	0.110236	0.23
p3@SCAMP3 [rs1046188]			p3@SCAMP3 [rs1046188]	rs4072037, rs2990245, rs1046188, rs2297480	chr1:155232139..155232158,-	p1@uc009wqh.2, p10@MUC1, p4@GBAP1, p2@GBAP1, p5@GBAP1, p3@GBAP1, p6@SCAMP3, p2@SCAMP3, p1@SCAMP3, p5@SCAMP3, p4@SCAMP3, p7@SCAMP3, p3@SCAMP3, p@chr1:155232276..155232286,+, p4@FDPS	0	0.21	0.121063	0.25
p@chr3:49360037..49360041,- [rs9873994]			p@chr3:49360037..49360041,- [rs9873994]	rs9873994	chr3:49360037..49360041,-	p@chr3:49360037..49360041,-	0	0.19	0.152559	0.29
p6@HIPK1 [rs3811019]			p6@HIPK1 [rs3811019]	rs3811019	chr1:114471809..114471855,+	p6@HIPK1	0	0.19	0.152887	0.29
enhancer@chr1:155951073-155951535 [rs1889532]			enhancer@chr1:155951073-155951535 [rs1889532]	rs928596, rs1889532, rs10796955	chr1:155951073-155951535	p3@ARHGEF2, enhancer@chr1:155951073-155951535, p10@ARHGEF2, p17@ARHGEF2	0	0.19	0.155184	0.29
enhancer@chr6:159514738-159514976 [rs654690]			enhancer@chr6:159514738-159514976 [rs654690]	rs654690	chr6:159514738-159514976	enhancer@chr6:159514738-159514976, p@chr6:159514738..159514749,-	0	0.19	0.169948	0.31
p@chr6:31543810..31543821,- [rs3093661]			p@chr6:31543810..31543821,- [rs3093661]	rs3828917, rs3093661, rs2256965	chr6:31543810..31543821,-	p@chr6:31465753..31465756,-, p3@MICB, p1@MICB, p@chr6:31543477..31543499,-, p@chr6:31543519..31543533,-, p@chr6:31543810..31543821,-, p2@LST1, p9@LST1	0	0.18	0.183399	0.33
p3@TNXB [rs8283]			p3@TNXB [rs8283]	rs1150754, rs8283	chr6:32083106..32083116,-	enhancer@chr6:32050642-32051035, p3@TNXB	0	0.18	0.19521	0.34
enhancer@chr6:167411692-167411848 [rs239935]			enhancer@chr6:167411692-167411848 [rs239935]	rs239935	chr6:167411692-167411848	enhancer@chr6:167411692-167411848	0	0.18	0.199803	0.34
p1@ENST00000431069 [rs3780373]			p1@ENST00000431069 [rs3780373]	rs3780373	chr9:5098356..5098369,+	p1@ENST00000431069	0	0.17	0.212927	0.35
enhancer@chr1:155433776-155433971 [rs12724079]			enhancer@chr1:155433776-155433971 [rs12724079]	rs12724079	chr1:155433776-155433971	enhancer@chr1:155433776-155433971	0	0.16	0.238517	0.38
p7@RBM6 [rs6772095]			p7@RBM6 [rs6772095]	rs2280406, rs6772095	chr3:49978342..49978346,+	p1@MST1R, chr3:49941317..49941322,-, p7@RBM6	0	0.16	0.261483	0.41
p2@uc001flf.2 [rs2048431]			p2@uc001flf.2 [rs2048431]	rs2048431	chr1:155618323..155618335,-	p2@uc001flf.2, p1@uc001flf.2	0	0.15	0.291667	0.44
p@chr6:32186154..32186158,- [rs438475]			p@chr6:32186154..32186158,- [rs438475]	rs438475	chr6:32186154..32186158,-	p@chr6:32186154..32186158,-	0	0.14	0.308071	0.46
p@chr1:200877847..200877851,+ [rs7554511]			p@chr1:200877847..200877851,+ [rs7554511]	rs7554511	chr1:200877847..200877851,+	p11@C1orf106, p@chr1:200877847..200877851,+	0	0.13	0.367454	0.54
enhancer@chr6:20811412-20811642 [rs9465900]			enhancer@chr6:20811412-20811642 [rs9465900]	rs9465900	chr6:20811412-20811642	enhancer@chr6:20811412-20811642	0	0.12	0.388123	0.55
p2@ATP2A1 [rs3888190]			p2@ATP2A1 [rs3888190]	rs3888190, rs6565259, rs7189927	chr16:28889703..28889730,+	p2@ATP2A1, p5@ATP2A1, p4@ATP2A1, p@chr16:28913897..28913907,+, p@chr16:28913935..28913946,+	0	0.12	0.399606	0.55
p14@FADS1 [rs174548]			p14@FADS1 [rs174548]	rs174548	chr11:61571172..61571181,-	p14@FADS1	0	0.12	0.407152	0.55
p1@RBM5 [rs2247510]			p1@RBM5 [rs2247510]	rs2247510	chr3:50126345..50126401,+	p1@RBM5	0	0.12	0.407808	0.55
p3@GON4L [rs3820594]			p3@GON4L [rs3820594]	rs3820594	chr1:155829208..155829230,-	p3@GON4L	0	0.1	0.482283	0.62
chr16:50668341..50668342,+ [rs12913]			chr16:50668341..50668342,+ [rs12913]	rs12913	chr16:50668341..50668342,+	chr16:50668341..50668342,+	0	0.09	0.485564	0.62
enhancer@chr5:158848054-158848257 [rs4921496]			enhancer@chr5:158848054-158848257 [rs4921496]	rs4921496	chr5:158848054-158848257	enhancer@chr5:158848054-158848257	0	0.09	0.488845	0.62
p4@SLC9A4 [rs4851011]			p4@SLC9A4 [rs4851011]	rs4851011, rs17027255	chr2:103089739..103089749,+	p3@SLC9A4, p5@SLC9A4, p4@SLC9A4, p2@SLC9A4, p1@SLC9A4, p6@SLC9A4	0	0.09	0.50164	0.63
p1@ZNF300 [rs7724036]			p1@ZNF300 [rs7724036]	rs1820682, rs7724036	chr5:150284532..150284549,-	enhancer@chr5:150261861-150262245, p1@ZNF300	0	0.09	0.516076	0.63
p@chr5:158705320..158705331,+ [rs12520035]			p@chr5:158705320..158705331,+ [rs12520035]	rs12520035	chr5:158705320..158705331,+	p@chr5:158705320..158705331,+	0	0.09	0.533793	0.64
p13@DGKD [rs838718]			p13@DGKD [rs838718]	rs838718, rs13016839	chr2:234296792..234296806,+	p13@DGKD, enhancer@chr2:234357256-234357513	0	0.08	0.544291	0.65
p2@TNFRSF6B [rs2297441]			p2@TNFRSF6B [rs2297441]	rs2297441	chr20:62327738..62327751,+	p2@TNFRSF6B	0	0.08	0.581037	0.68
		rs2297441:rs11696871 D'=0.96; rsquared=0.61. chr20:62387380..62387381,- [rs11696871]	chr20:62387380..62387381,- [rs11696871]	rs11696871	chr20:62387380..62387381,-	chr20:62387380..62387381,-	0	0.01	0.95374	0.97
p2@NKX2-3 [rs10883371]			p2@NKX2-3 [rs10883371]	rs10883371	chr10:101292731..101292741,+	p1@NKX2-3, p2@NKX2-3	0	0.06	0.641076	0.74
p5@LRRK2 [rs1388597]			p5@LRRK2 [rs1388597]	rs1388597	chr12:40618331..40618360,+	p5@LRRK2	0	0.05	0.712598	0.8
p1@SCARNA5 [rs3792109]			p1@SCARNA5 [rs3792109]	rs3792109	chr2:234184368..234184381,+	p1@SCARNA5	0	0.04	0.771982	0.86
p@chr3:49570849..49570853,+ [rs1050088]			p@chr3:49570849..49570853,+ [rs1050088]	rs1050088	chr3:49570849..49570853,+	p@chr3:49570849..49570853,+	0	0.03	0.838911	0.91
		rs1050088:rs3811697 D'=1.0; rsquared=0.32. p@chr3:49591052..49591057,+ [rs3811697]	p@chr3:49591052..49591057,+ [rs3811697]	rs3811697, rs11709525	chr3:49591052..49591057,+	p@chr3:49591052..49591057,+, chr3:49690408..49690421,+	0	0.02	0.871063	0.92
p9@EBF1 [rs7442701]			p9@EBF1 [rs7442701]	rs7442701	chr5:158523357..158523390,-	p9@EBF1, p20@EBF1	0	0.03	0.844816	0.91
enhancer@chr16:50554457-50554868 [rs12930566]			enhancer@chr16:50554457-50554868 [rs12930566]	rs12930566	chr16:50554457-50554868	enhancer@chr16:50554457-50554868	0	0.02	0.891404	0.92
p1@GTF2H4 [rs2074510]			p1@GTF2H4 [rs2074510]	rs2074510	chr6:30875955..30876012,+	p1@GTF2H4	0	0.02	0.897638	0.92
p@chr6:134637878..134637882,- [rs6923743]			p@chr6:134637878..134637882,- [rs6923743]	rs6923743	chr6:134637878..134637882,-	p@chr6:134637878..134637882,-	0	0	1	1
Ulcerative colitis
Top promoter[SNPs in top promoter]		Linkage	Top promoter[SNPs in top promoter]	promoter snps in region	chosen promoter id	promoters	original p	Corrected coexpression score	raw p(perm)	FDR
p1@TRIM40 [rs9261467]			p1@TRIM40 [rs9261467]	rs9261447, rs9261467	chr6:30103907..30103922,+	p3@uc003npj.2, p1@uc003npj.2, p2@uc003npj.2, p2@TRIM40, p1@TRIM40	0	0.67	0	0
		rs9261467:rs9295829 D'=0.84; rsquared=0.6. p3@ZNRD1-AS1 [rs9295829]	p3@ZNRD1-AS1 [rs9295829]	rs3903160, rs9295829	chr6:30028595..30028624,-	p@chr6:29932741..29932763,-, enhancer@chr6:29932777-29932958, p@chr6:29932797..29932817,+, p@chr6:29932843..29932858,+, p3@ZNRD1-AS1, p4@ZNRD1-AS1	0	0.33	0.0132013	0.05
		rs9261467:rs9295829 D'=0.84; rsquared=0.6. p2@ZNRD1 [rs9295829]	p2@ZNRD1 [rs9295829]	rs9295829	chr6:30029008..30029055,+	p2@ZNRD1, p1@ZNRD1, p3@ZNRD1	0	0.16	0.299387	0.45
p4@RNF186 [rs12064796]			p4@RNF186 [rs12064796]	rs12064796, rs12124726	chr1:20141662..20141673,-	p2@RNF186, p4@RNF186, p5@RNF186, p3@RNF186, p1@RNF186, p@chr1:20209280..20209297,-	0	0.61	0	0
p2@HLA-DQA1 [rs9272426]			p2@HLA-DQA1 [rs9272426]	rs17425622, rs2858870, rs9271170, rs660895, rs13204672, rs2097431, rs35399661, rs9271588, rs9272426, rs1129765, rs3891175, rs2856692, rs4642516, rs9469220, rs2067577, rs2857154	chr6:32605195..32605206,+	enhancer@chr6:32571766-32572024, p@chr6:32571766..32571807,-, p@chr6:32571930..32571970,+, p@chr6:32571976..32571986,+, p@chr6:32572305..32572317,-, p@chr6:32572499..32572517,+, enhancer@chr6:32577297-32577935, p@chr6:32577347..32577350,-, p@chr6:32577605..32577616,-, p@chr6:32577619..32577667,-, p@chr6:32577678..32577698,-, p@chr6:32577917..32577935,+, p@chr6:32582541..32582590,-, enhancer@chr6:…	0	0.6	0	0
p11@C1orf106 [rs7554511]			p11@C1orf106 [rs7554511]	rs7554511	chr1:200877618..200877623,+	p11@C1orf106	0	0.56	0	0
		same SNP, different promoter: p@chr1:200877847..200877851,+ [rs7554511]	p@chr1:200877847..200877851,+ [rs7554511]	rs7554511	chr1:200877847..200877851,+	p@chr1:200877847..200877851,+	0	0.19	0.228666	0.37
		rs7554511:rs296533 D'=0.73; rsquared=0.4. enhancer@chr1:200865457-200866265 [rs296533]	enhancer@chr1:200865457-200866265 [rs296533]	rs296533	chr1:200865457-200866265	enhancer@chr1:200865457-200866265	0	0.08	0.61834	0.73
p1@LOC100133445, p1@LOC115110 [rs1886730]			p1@LOC100133445, p1@LOC115110 [rs1886730]	rs3762444, rs1886730	chr1:2488426..2488475,-	p@chr1:2427900..2427911,+, chr1:2488395..2488417,-, p1@LOC100133445,p1@LOC115110, p1@ENST00000452793	0	0.54	0	0
p3@HLA-DQA1 [rs3135391]			p3@HLA-DQA1 [rs3135391]	rs3817969, rs2395175, rs3129883, rs9268658, rs3135391, rs2239804, rs3129888, rs2239803, rs4935356, rs3135388, rs9268833, rs9268835, rs9268831	chr6:32411123..32411172,+	p@chr6:32361485..32361498,-, enhancer@chr6:32405012-32405514, p3@HLA-DRA, p5@HLA-DRA, p2@HLA-DRA, p6@HLA-DRA, p4@HLA-DQA1, p@chr6:32411003..32411021,-, p@chr6:32411062..32411086,-, p3@HLA-DQA1, p6@HLA-DQA1, p10@HLA-DQA1, p4@HLA-DRA, p1@CU687129, p@chr6:32412417..32412458,+, p@chr6:32412534..32412660,+, p@chr6:32412666..32412686,+, p@chr6:32412808..32412821,-, enhancer@chr6:32427743-32428120	0	0.51	0	0
		rs3135391:rs2050188 D'=1.0; rsquared=0.47. p2@C6orf10 [rs2050188]	p2@C6orf10 [rs2050188]	rs2050188	chr6:32339686..32339696,-	p3@C6orf10, p1@C6orf10, p2@C6orf10	0	0.28	0.0528053	0.15
p@chr20:62366043..62366057,+ [rs2427533]			p@chr20:62366043..62366057,+ [rs2427533]	rs2427533	chr20:62366043..62366057,+	p5@ZGPAT, p8@ZGPAT, p@chr20:62366022..62366027,+, p@chr20:62366029..62366032,+, p@chr20:62366043..62366057,+, p@chr20:62366061..62366072,+, p@chr20:62366083..62366102,+	0	0.48	0	0
p@chr11:6461452..6461464,- [rs10839564]			p@chr11:6461452..6461464,- [rs10839564]	rs10839564	chr11:6461452..6461464,-	p@chr11:6461452..6461464,-, p@chr11:6461785..6461799,-	0	0.46	0	0
p2@LSP1 [rs907611]			p2@LSP1 [rs907611]	rs907611, rs11041476	chr11:1874342..1874372,+	chr11:1873974..1873988,+, p@chr11:1874069..1874102,-, p1@LSP1, p2@LSP1, enhancer@chr11:1875032-1875265	0	0.45	0	0
p2@FAM55A [rs661946]			p2@FAM55A [rs661946]	rs661946	chr11:114430570..114430581,-	p2@FAM55A, p1@FAM55A	0	0.44	0	0
p3@X07061, p3@X07062 [rs1058026]			p3@X07061, p3@X07062 [rs1058026]	rs1058026	chr6:31321695..31321745,-	p3@X07061,p3@X07062, p2@X07061,p2@X07062	0	0.4	0.00141443	0.01
p2@NKX2-3 [rs10883371, rs10883373]			p2@NKX2-3 [rs10883371, rs10883373]	rs10883371, rs10883373	chr10:101292731..101292741,+	p1@NKX2-3, p2@NKX2-3	0	0.4	0.00141443	0.01
p@chr1:206943938..206943954,- [rs3024493]			p@chr1:206943938..206943954,- [rs3024493]	rs10863805, rs3024505, rs3024493	chr1:206943938..206943954,-	p27@MAPKAPK2, p6@MAPKAPK2, p22@MAPKAPK2, enhancer@chr1:206939730-206940044, p@chr1:206940013..206940044,+, p@chr1:206943938..206943954,-, p@chr1:206944110..206944138,+, p@chr1:206944141..206944157,+	0	0.39	0.00141443	0.01
p27@CFB [rs1048709]			p27@CFB [rs1048709]	rs1048709	chr6:31914834..31914844,+	p@chr6:31914817..31914830,-, p27@CFB, p10@CFB	0	0.37	0.00330033	0.02
p13@TMBIM1 [rs2382817]			p13@TMBIM1 [rs2382817]	rs4674282, rs2382817, rs13005100, rs13031757, rs992157	chr2:219151278..219151317,-	p5@TMBIM1, p13@TMBIM1, p8@TMBIM1, chr2:219151884..219151889,-, p3@TMBIM1, p@chr2:219152077..219152093,+, p@chr2:219152103..219152123,+, p@chr2:219152127..219152139,+, p7@TMBIM1	0	0.36	0.00471476	0.03
p@chr17:38029166..38029196,+ [rs12936231]			p@chr17:38029166..38029196,+ [rs12936231]	rs12946510, rs907091, rs907092, rs9909593, rs12936231, rs3902025	chr17:38029166..38029196,+	enhancer@chr17:37912171-37912498, p@chr17:37921587..37921593,-, p@chr17:37922281..37922314,-, enhancer@chr17:37969952-37970167, p@chr17:37970009..37970013,-, p@chr17:38029166..38029196,+, p2@GSDMA, p1@GSDMA	0	0.36	0.0049505	0.03
p5@CCNY [rs12242110]			p5@CCNY [rs12242110]	rs12242110	chr10:35535943..35535970,+	p5@CCNY	0	0.36	0.00518623	0.03
p4@PMPCA [rs3812584]			p4@PMPCA [rs3812584]	rs3812584	chr9:139312981..139312986,+	p4@PMPCA	0	0.36	0.00707214	0.03
		same SNP, different promoter: p3@PMPCA [rs3812584]	p3@PMPCA [rs3812584]	rs3812584	chr9:139313013..139313034,+	p3@PMPCA	0	0.29	0.0424328	0.13
enhancer@chr1:151792678-151793001 [rs949969]			enhancer@chr1:151792678-151793001 [rs949969]	rs949969	chr1:151792678-151793001	enhancer@chr1:151792678-151793001	0	0.34	0.0101367	0.04
p7@CREM [rs4934730]			p7@CREM [rs4934730]	rs4934730, rs12761675, rs1057108, rs17591857	chr10:35415761..35415800,+	p9@CREM, p7@CREM, enhancer@chr10:35438214-35438795, p2@CREM, p@chr10:35484899..35484906,-, p15@CREM, enhancer@chr10:35498991-35499412	0	0.34	0.0106082	0.04
p4@CXCR2 [rs4674258]			p4@CXCR2 [rs4674258]	rs4674258, rs4674259, rs11676348, rs13027120	chr2:218990832..218990844,+	p3@CXCR2, p1@CXCR2, p4@CXCR2, p8@CXCR2, enhancer@chr2:219009888-219010209, p@chr2:219010064..219010095,+, enhancer@chr2:219020844-219021165	0	0.33	0.0141443	0.05
p28@TNIP1 [rs2233287]			p28@TNIP1 [rs2233287]	rs2233287	chr5:150440029..150440040,-	p28@TNIP1, p25@TNIP1	0	0.31	0.0261669	0.09
p4@MZB1 [rs9327847]			p4@MZB1 [rs9327847]	rs9327847	chr5:138724331..138724347,-	p4@MZB1, p5@MZB1	0	0.3	0.0330033	0.11
p@chr1:8022209..8022235,- [rs3766606]			p@chr1:8022209..8022235,- [rs3766606]	rs35675666, rs3766606	chr1:8022209..8022235,-	p2@PARK7, p@chr1:8022209..8022235,-	0	0.3	0.0330033	0.11
p@chr6:31464084..31464111,- [rs6916394]			p@chr6:31464084..31464111,- [rs6916394]	rs6916394	chr6:31464084..31464111,-	p@chr6:31464084..31464111,-	0	0.29	0.0391325	0.12
		rs6916394:rs3828912 D'=1.0; rsquared=1.0. p@chr6:31465753..31465756,- [rs3828912, rs3828914]; rs6916394:rs3828914 D'=1.0; rsquared=1.0. p@chr6:31465753..31465756,- [rs3828912, rs3828914]	p@chr6:31465753..31465756,- [rs3828912, rs3828914]	rs3828912, rs3828914, rs6915833	chr6:31465753..31465756,-	p@chr6:31465753..31465756,-, p3@MICB, p1@MICB	0	0.04	0.830033	0.89
p@chr5:498417..498421,- [rs12521198]			p@chr5:498417..498421,- [rs12521198]	rs12521198	chr5:498417..498421,-	p@chr5:498417..498421,-	0	0.29	0.0393682	0.12
enhancer@chr14:98513457-98513851 [rs8008845]			enhancer@chr14:98513457-98513851 [rs8008845]	rs8008845	chr14:98513457-98513851	enhancer@chr14:98513457-98513851	0	0.27	0.0563413	0.16
enhancer@chr2:61095090-61095322 [rs842639]			enhancer@chr2:61095090-61095322 [rs842639]	rs842639, rs3732179	chr2:61095090-61095322	enhancer@chr2:61095090-61095322, p@chr2:61154146..61154157,-	0	0.27	0.0636492	0.17
p1@SLC26A3 [rs2301988, rs2301989]			p1@SLC26A3 [rs2301988, rs2301989]	rs2301988, rs2301989	chr7:107443661..107443675,-	p1@SLC26A3	0	0.26	0.0714286	0.19
p15@GAL3ST1 [rs7286285]			p15@GAL3ST1 [rs7286285]	rs7286285	chr22:30953587..30953595,-	p15@GAL3ST1	0	0.25	0.0855728	0.21
enhancer@chr18:4003748-4003994 [rs16945853]			enhancer@chr18:4003748-4003994 [rs16945853]	rs16945853	chr18:4003748-4003994	enhancer@chr18:4003748-4003994	0	0.25	0.0867515	0.21
enhancer@chr3:49389809-49389972 [rs17080528]			enhancer@chr3:49389809-49389972 [rs17080528]	rs34915642, rs9873994, rs17080528	chr3:49389809-49389972	enhancer@chr3:49358291-49358883, p@chr3:49360037..49360041,-, enhancer@chr3:49389809-49389972	0	0.23	0.117633	0.27
		rs17080528:rs11716445 D'=1.0; rsquared=0.3. p@chr3:49405916..49405955,- [rs11716445]	p@chr3:49405916..49405955,- [rs11716445]	rs11716445	chr3:49405916..49405955,-	p@chr3:49405916..49405955,-	0	0.05	0.752947	0.83
enhancer@chr5:601191-601577 [rs3749615]			enhancer@chr5:601191-601577 [rs3749615]	rs3749615	chr5:601191-601577	enhancer@chr5:601191-601577	0	0.23	0.117869	0.27
		rs3749615:rs7434 D'=1.0; rsquared=1.0. p@chr5:660645..660655,- [rs7434]	p@chr5:660645..660655,- [rs7434]	rs7434	chr5:660645..660655,-	p@chr5:660645..660655,-	0	0.14	0.352664	0.5
enhancer@chr2:61204524-61204872 [rs7608910]			enhancer@chr2:61204524-61204872 [rs7608910]	rs7608910	chr2:61204524-61204872	enhancer@chr2:61204524-61204872	0	0.23	0.123291	0.27
p@chr6:32186154..32186158,- [rs436388]			p@chr6:32186154..32186158,- [rs436388]	rs436388	chr6:32186154..32186158,-	p@chr6:32186154..32186158,-	0	0.23	0.125413	0.27
		rs436388:rs176095 D'=1.0; rsquared=0.21. p@chr6:32158228..32158249,+ [rs176095]	p@chr6:32158228..32158249,+ [rs176095]	rs3134947, rs176095	chr6:32158228..32158249,+	p15@AGPAT1, p@chr6:32158228..32158249,+	0	0.19	0.208392	0.37
		rs436388:rs3134947 D'=0.92; rsquared=0.18. p2@AGPAT1 [rs3134947]	p2@AGPAT1 [rs3134947]	rs3134947, rs3134945, rs204995, rs176095	chr6:32144838..32144908,-	p2@AGPAT1, p9@AGPAT1, p5@AGPAT1, p1@AK311221, p1@ENST00000559458, p4@PBX2, p12@PBX2	0	0.03	0.876709	0.91
p1@GNA12 [rs1636249]			p1@GNA12 [rs1636249]	rs1636249	chr7:2883928..2883993,-	p1@GNA12	0	0.23	0.125648	0.27
enhancer@chr5:40410103-40410947 [rs6451493, rs11742570]			enhancer@chr5:40410103-40410947 [rs6451493, rs11742570]	rs6451493, rs11742570, rs6451494	chr5:40410103-40410947	enhancer@chr5:40410103-40410947, p@chr5:40410378..40410401,-, p@chr5:40410410..40410423,-, p@chr5:40410427..40410436,-, p@chr5:40410450..40410478,-, p@chr5:40410557..40410561,+, enhancer@chr5:40411118-40411409, p@chr5:40411307..40411326,+	0	0.21	0.163602	0.32
p@chr3:49139102..49139119,- [rs35673421]			p@chr3:49139102..49139119,- [rs35673421]	rs35673421	chr3:49139102..49139119,-	p@chr3:49139102..49139119,-	0	0.21	0.164074	0.32
chr2:28203328..28203338,+ [rs898031]			chr2:28203328..28203338,+ [rs898031]	rs898031	chr2:28203328..28203338,+	p@chr2:28203275..28203307,+, chr2:28203328..28203338,+, p@chr2:28203353..28203364,+	0	0.21	0.166667	0.32
p1@ENST00000448198, p1@ENST00000455328 [rs3916765]			p1@ENST00000448198, p1@ENST00000455328 [rs3916765]	rs3916765	chr6:32685788..32685800,+	p1@ENST00000448198,p1@ENST00000455328	0	0.21	0.167845	0.32
p@chr8:135520294..135520308,- [rs16905158]			p@chr8:135520294..135520308,- [rs16905158]	rs16905158	chr8:135520294..135520308,-	p@chr8:135520294..135520308,-	0	0.21	0.171146	0.32
enhancer@chr6:42081758-42081907 [rs9462770]			enhancer@chr6:42081758-42081907 [rs9462770]	rs9462770	chr6:42081758-42081907	enhancer@chr6:42081758-42081907	0	0.2	0.181047	0.33
p1@RBM5 [rs2247510]			p1@RBM5 [rs2247510]	rs2247510	chr3:50126345..50126401,+	p1@RBM5	0	0.19	0.205092	0.37
p11@PNMT [rs876493]			p11@PNMT [rs876493]	rs876493	chr17:37824505..37824516,+	p11@PNMT, p6@PNMT, p15@PNMT, p2@PNMT	0	0.19	0.213343	0.37
p2@TNFRSF6B [rs2297441]			p2@TNFRSF6B [rs2297441]	rs2297441	chr20:62327738..62327751,+	p2@TNFRSF6B	0	0.19	0.216879	0.37
enhancer@chr13:37723502-37723846 [rs17054986]			enhancer@chr13:37723502-37723846 [rs17054986]	rs17054986	chr13:37723502-37723846	enhancer@chr13:37723502-37723846	0	0.19	0.220179	0.37
p@chr3:49591052..49591057,+ [rs3811697]			p@chr3:49591052..49591057,+ [rs3811697]	rs3811697, rs11709525	chr3:49591052..49591057,+	p@chr3:49591052..49591057,+, chr3:49690408..49690421,+	0	0.18	0.243989	0.39
p@chr6:29635769..29635797,+ [rs1318631]			p@chr6:29635769..29635797,+ [rs1318631]	rs1318631	chr6:29635769..29635797,+	p@chr6:29635769..29635797,+	0	0.18	0.254833	0.4
p9@MMP23B [rs28456011]			p9@MMP23B [rs28456011]	rs28456011	chr1:1567372..1567385,+	p9@MMP23B, p6@MMP23B, p2@MMP23B	0	0.16	0.300802	0.45
chr3:49941317..49941322,- [rs2280406]			chr3:49941317..49941322,- [rs2280406]	rs2280406	chr3:49941317..49941322,-	p1@MST1R, chr3:49941317..49941322,-	0	0.16	0.300802	0.45
		rs2280406:rs6772095 D'=1.0; rsquared=0.87. p7@RBM6 [rs6772095]	p7@RBM6 [rs6772095]	rs6772095	chr3:49978342..49978346,+	p7@RBM6	0	0.1	0.547383	0.69
enhancer@chr21:40466283-40466718 [rs2836882]			enhancer@chr21:40466283-40466718 [rs2836882]	rs2836882	chr21:40466283-40466718	enhancer@chr21:40466283-40466718, p@chr21:40466627..40466641,+	0	0.15	0.326025	0.47
p@chr4:148535454..148535476,- [rs931779]			p@chr4:148535454..148535476,- [rs931779]	rs931779	chr4:148535454..148535476,-	p@chr4:148535454..148535476,-	0	0.15	0.344884	0.49
p@chr1:110364218..110364229,+ [rs2938616]			p@chr1:110364218..110364229,+ [rs2938616]	rs2938616	chr1:110364218..110364229,+	p@chr1:110364218..110364229,+	0	0.13	0.402876	0.56
p@chr5:149627361..149627384,- [rs7711562]			p@chr5:149627361..149627384,- [rs7711562]	rs7711562	chr5:149627361..149627384,-	p@chr5:149627361..149627384,-	0	0.12	0.451674	0.61
p@chr12:7032510..7032525,+ [rs10849541]			p@chr12:7032510..7032525,+ [rs10849541]	rs10849541, rs7296818, rs7310941	chr12:7032510..7032525,+	p6@ENO2, p@chr12:7032510..7032525,+, chr12:7032701..7032732,+, p21@ATN1	0	0.11	0.474305	0.63
enhancer@chr1:36715455-36715834 [rs11263868]			enhancer@chr1:36715455-36715834 [rs11263868]	rs11263868	chr1:36715455-36715834	enhancer@chr1:36715455-36715834	0	0.1	0.516502	0.68
enhancer@chr5:158826036-158826401 [rs918519]			enhancer@chr5:158826036-158826401 [rs918519]	rs918519	chr5:158826036-158826401	enhancer@chr5:158826036-158826401	0	0.1	0.52546	0.68
p4@PRKAR1B [rs4074132]			p4@PRKAR1B [rs4074132]	rs4074132	chr7:751078..751162,-	p4@PRKAR1B	0	0.1	0.535596	0.68
p1@ENST00000431069 [rs3780373]			p1@ENST00000431069 [rs3780373]	rs3780373	chr9:5098356..5098369,+	p1@ENST00000431069	0	0.09	0.599246	0.73
enhancer@chr6:30716597-30717062 [rs12210092]			enhancer@chr6:30716597-30717062 [rs12210092]	rs12210092	chr6:30716597-30717062	enhancer@chr6:30716597-30717062	0	0.08	0.610561	0.73
enhancer@chr3:138565329-138565569 [rs11716652]			enhancer@chr3:138565329-138565569 [rs11716652]	rs11716652	chr3:138565329-138565569	enhancer@chr3:138565329-138565569	0	0.08	0.617162	0.73
chr2:127816629..127816649,+ [rs17014835]			chr2:127816629..127816649,+ [rs17014835]	rs17014835	chr2:127816629..127816649,+	chr2:127816629..127816649,+	0	0.07	0.676803	0.79
p1@MLH3 [rs175083]			p1@MLH3 [rs175083]	rs175083	chr14:75518129..75518188,-	p1@MLH3	0	0.06	0.689062	0.79
p12@LAMB1 [rs2158836]			p12@LAMB1 [rs2158836]	rs10232049, rs2158836	chr7:107580627..107580640,-	p@chr7:107566340..107566344,-, p12@LAMB1, p5@LAMB1	0	0.06	0.692598	0.79
enhancer@chr17:25691108-25691369 [rs322207]			enhancer@chr17:25691108-25691369 [rs322207]	rs322207	chr17:25691108-25691369	enhancer@chr17:25691108-25691369	0	0.06	0.73173	0.82
enhancer@chr7:22711367-22711465 [rs17147141]			enhancer@chr7:22711367-22711465 [rs17147141]	rs17147141	chr7:22711367-22711465	enhancer@chr7:22711367-22711465	0	0.04	0.822489	0.89
p1@ZFP90 [rs1170445, rs1170444]			p1@ZFP90 [rs1170445, rs1170444]	rs1170445, rs1170444	chr16:68573182..68573228,+	p1@ZFP90	0	0.03	0.847006	0.9
enhancer@chr12:8147722-8148111 [rs10161016]			enhancer@chr12:8147722-8148111 [rs10161016]	rs10161016	chr12:8147722-8148111	enhancer@chr12:8147722-8148111	0	0.03	0.8529	0.9
p1@SLC38A3 [rs1858828]			p1@SLC38A3 [rs1858828]	rs1858828	chr3:50242680..50242716,+	p1@SLC38A3	0	0.01	0.950024	0.97
p@chr13:77463947..77463954,- [rs17066875]			p@chr13:77463947..77463954,- [rs17066875]	rs17066875	chr13:77463947..77463954,-	p@chr13:77463947..77463954,-	0	0	0.992928	1
p2@RPL22 [rs4908865]			p2@RPL22 [rs4908865]	rs4908865	chr1:6269335..6269436,-	p2@RPL22	0	0	1	1
